# Supplementary material for: Relaxant Activity of 4H-Pyran and 1,6-Dihydropyridine Derivatives on Isolated Rat Trachea
Source: MDPI journal article supplement (doi:10.3390/ddc3020020), 2024-04-11
Supplement: s1 [file s1]

## SUPPLEMENTARY MATERIALS

# Relaxant Activity of 4H-Pyran and 1,6-Dihydropyridine Derivatives on Isolated Rat Trachea

Samuel Estrada-Soto <sup>1,†,\*</sup>, Soledad Alemán-Pantitlán <sup>1</sup>, Emmanuel Gaona-Tovar <sup>1</sup>, Fernando Hernández-Borja <sup>2</sup>, Yolanda Alcaraz <sup>3</sup>, Rafael Villalobos-Molina <sup>4</sup>, and Miguel A. Vázquez <sup>2,†,\*</sup>

<sup>1</sup> Facultad de Farmacia, Universidad Autónoma del Estado de Morelos, Cuernavaca, Mor. 62209, México.

<sup>2</sup> Departamento de Química, División de Ciencias Naturales y Exactas, Universidad de Guanajuato, Gto., 36050, México.

<sup>3</sup> Departamento de Farmacia, Universidad de Guanajuato, Guanajuato, Gto. 36050, México.

<sup>4</sup> Unidad de Biomedicina, Facultad de Estudios Superiores-Iztacala, Universidad Nacional Autónoma de México, Tlalnepantla, México 54090, México.

### Contents

### page

<sup>1</sup>H, <sup>13</sup>C NMR and other NMR data and HRMS

S1-S39

S1

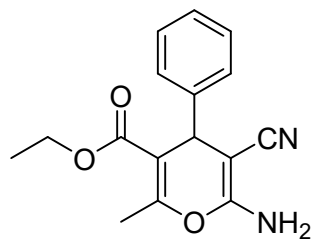

4a

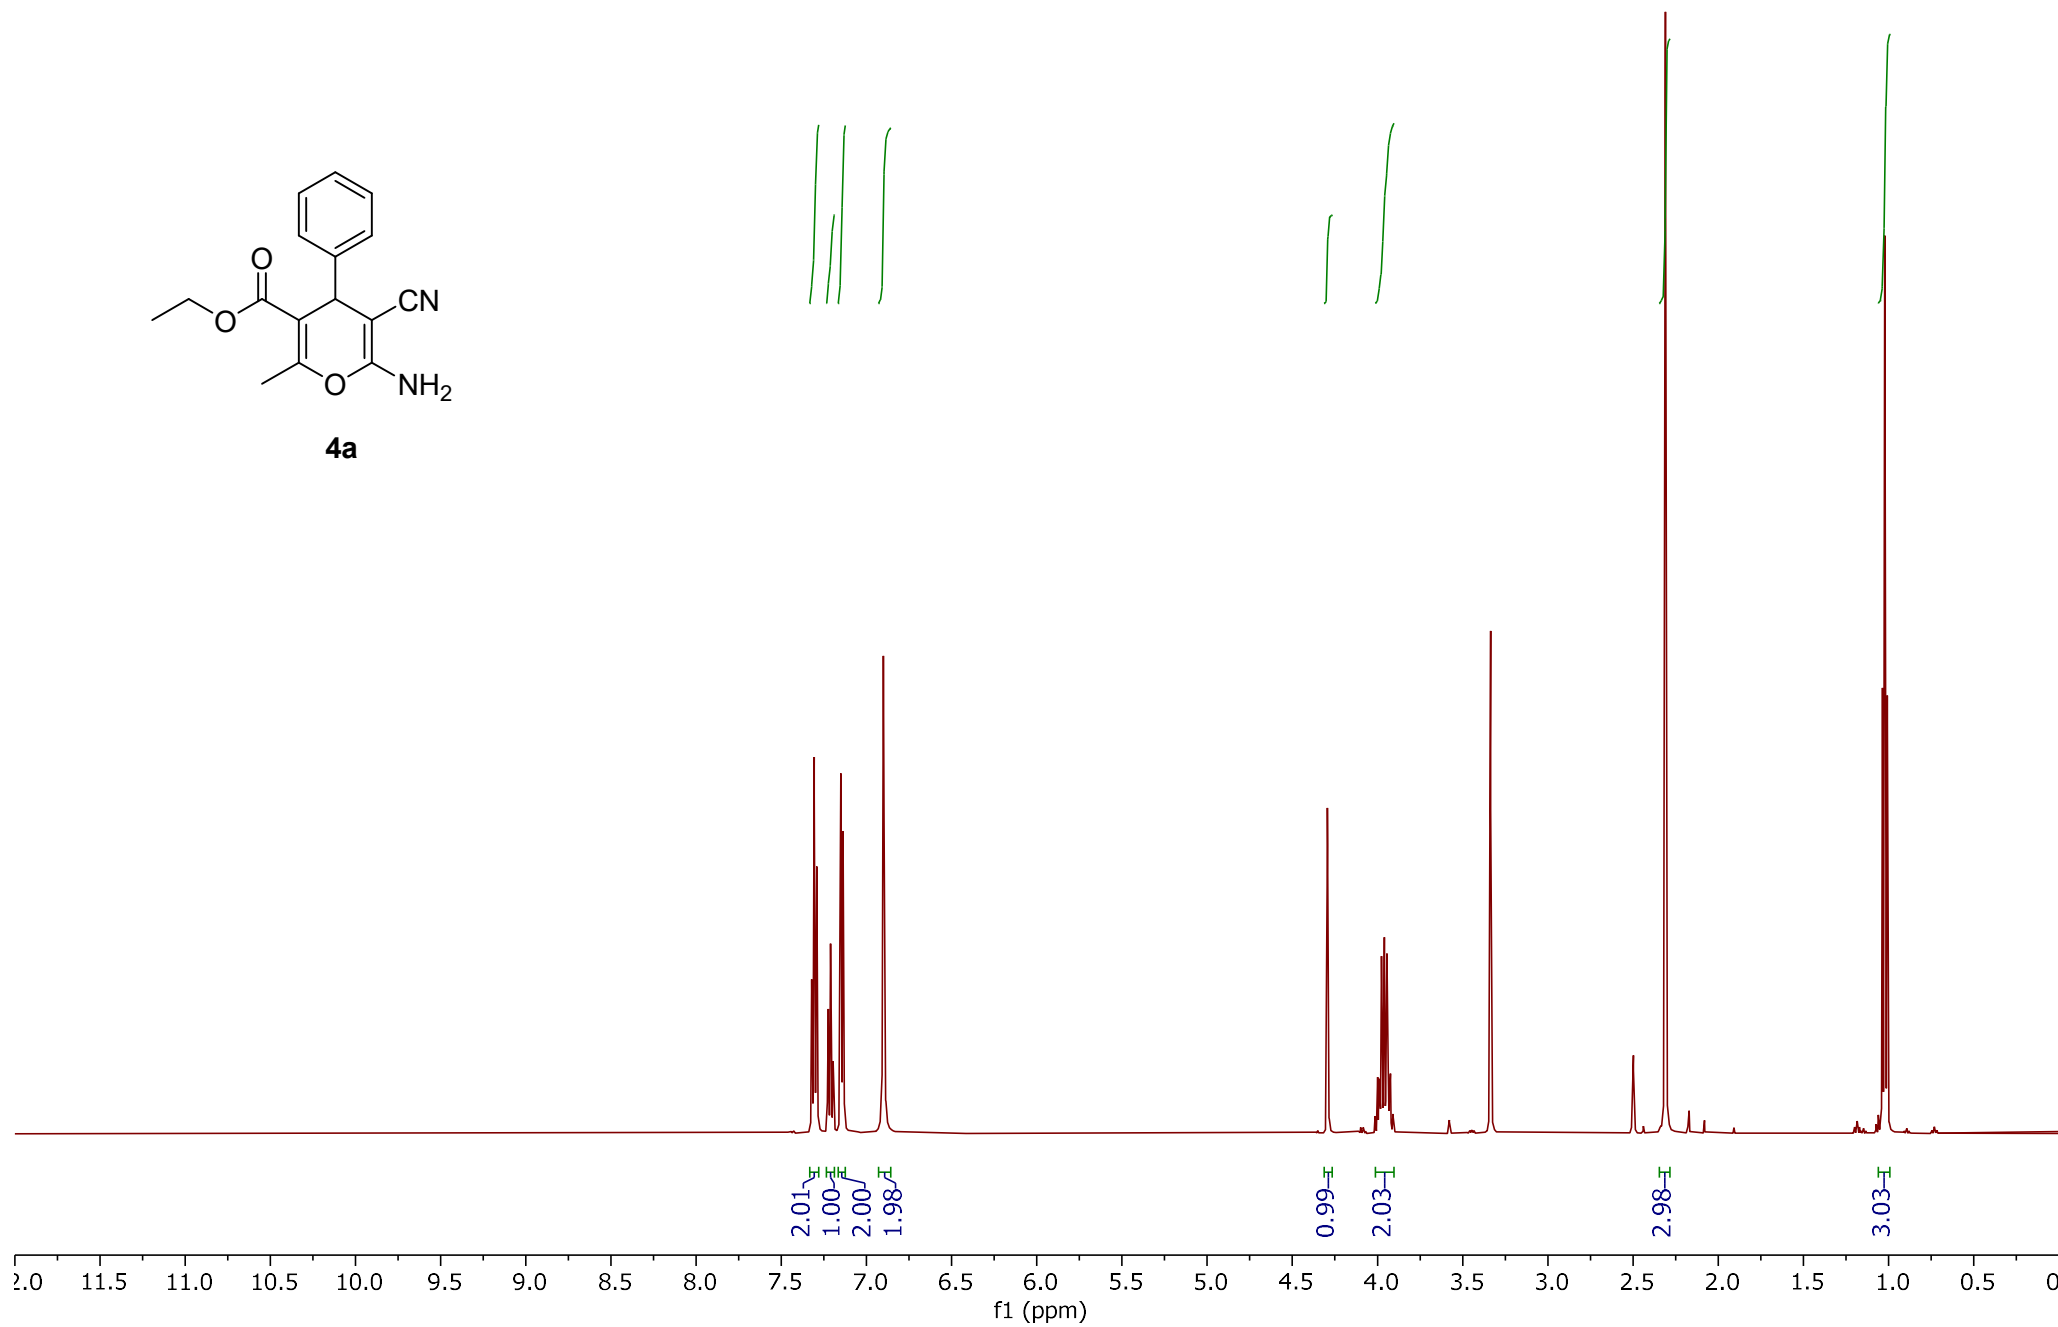

<sup>1</sup>H NMR (DMSO-*d*<sub>6</sub>) 4a

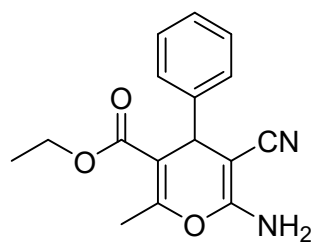**4a**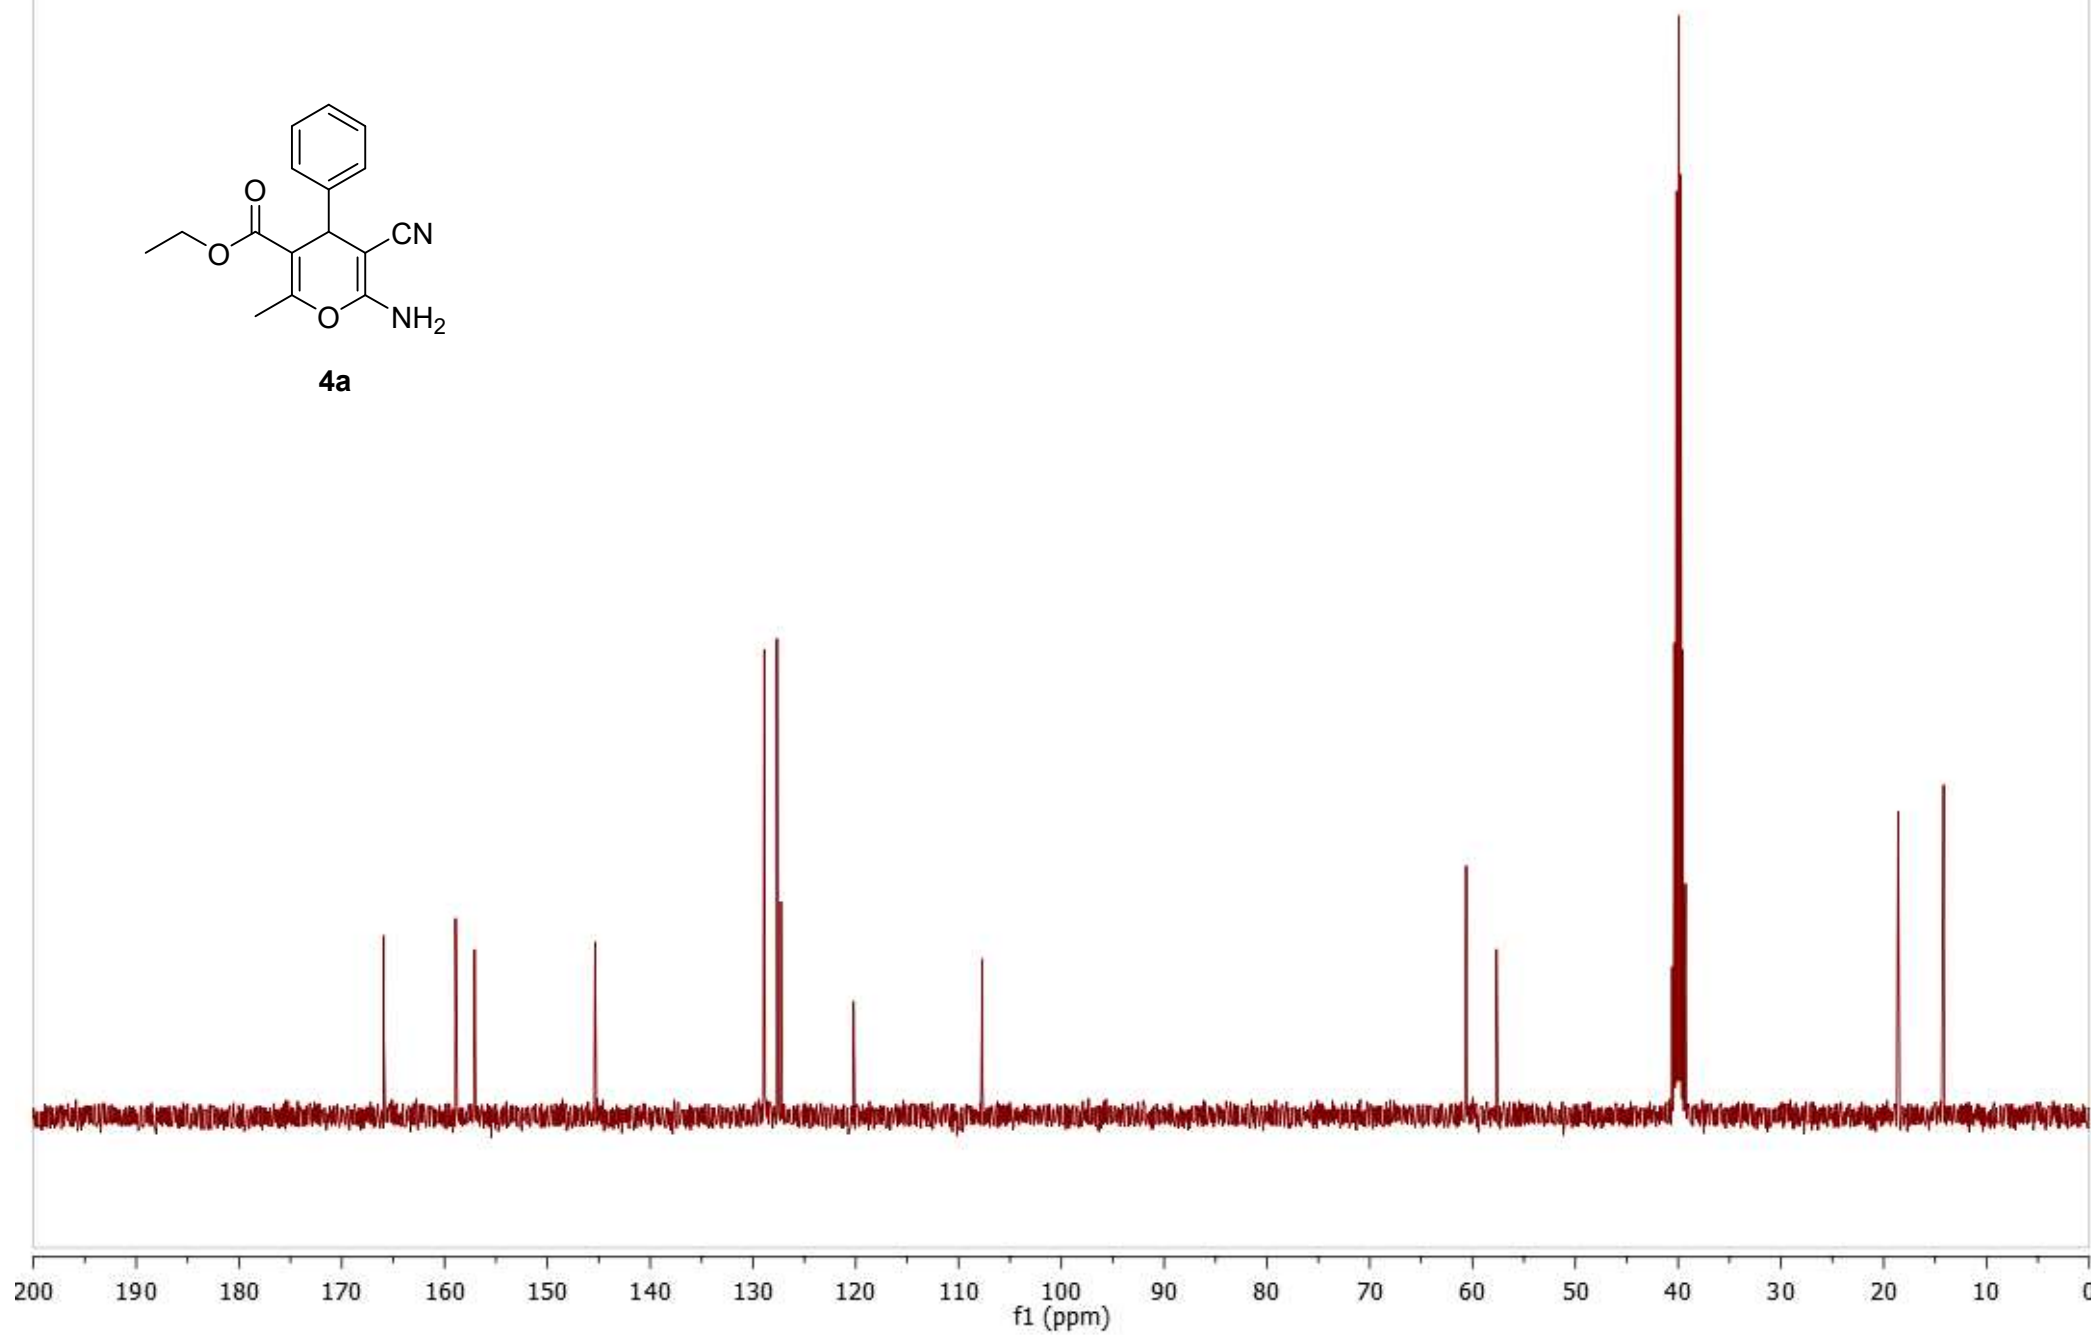<sup>13</sup>C NMR (DMSO-*d*<sub>6</sub>) **4a**

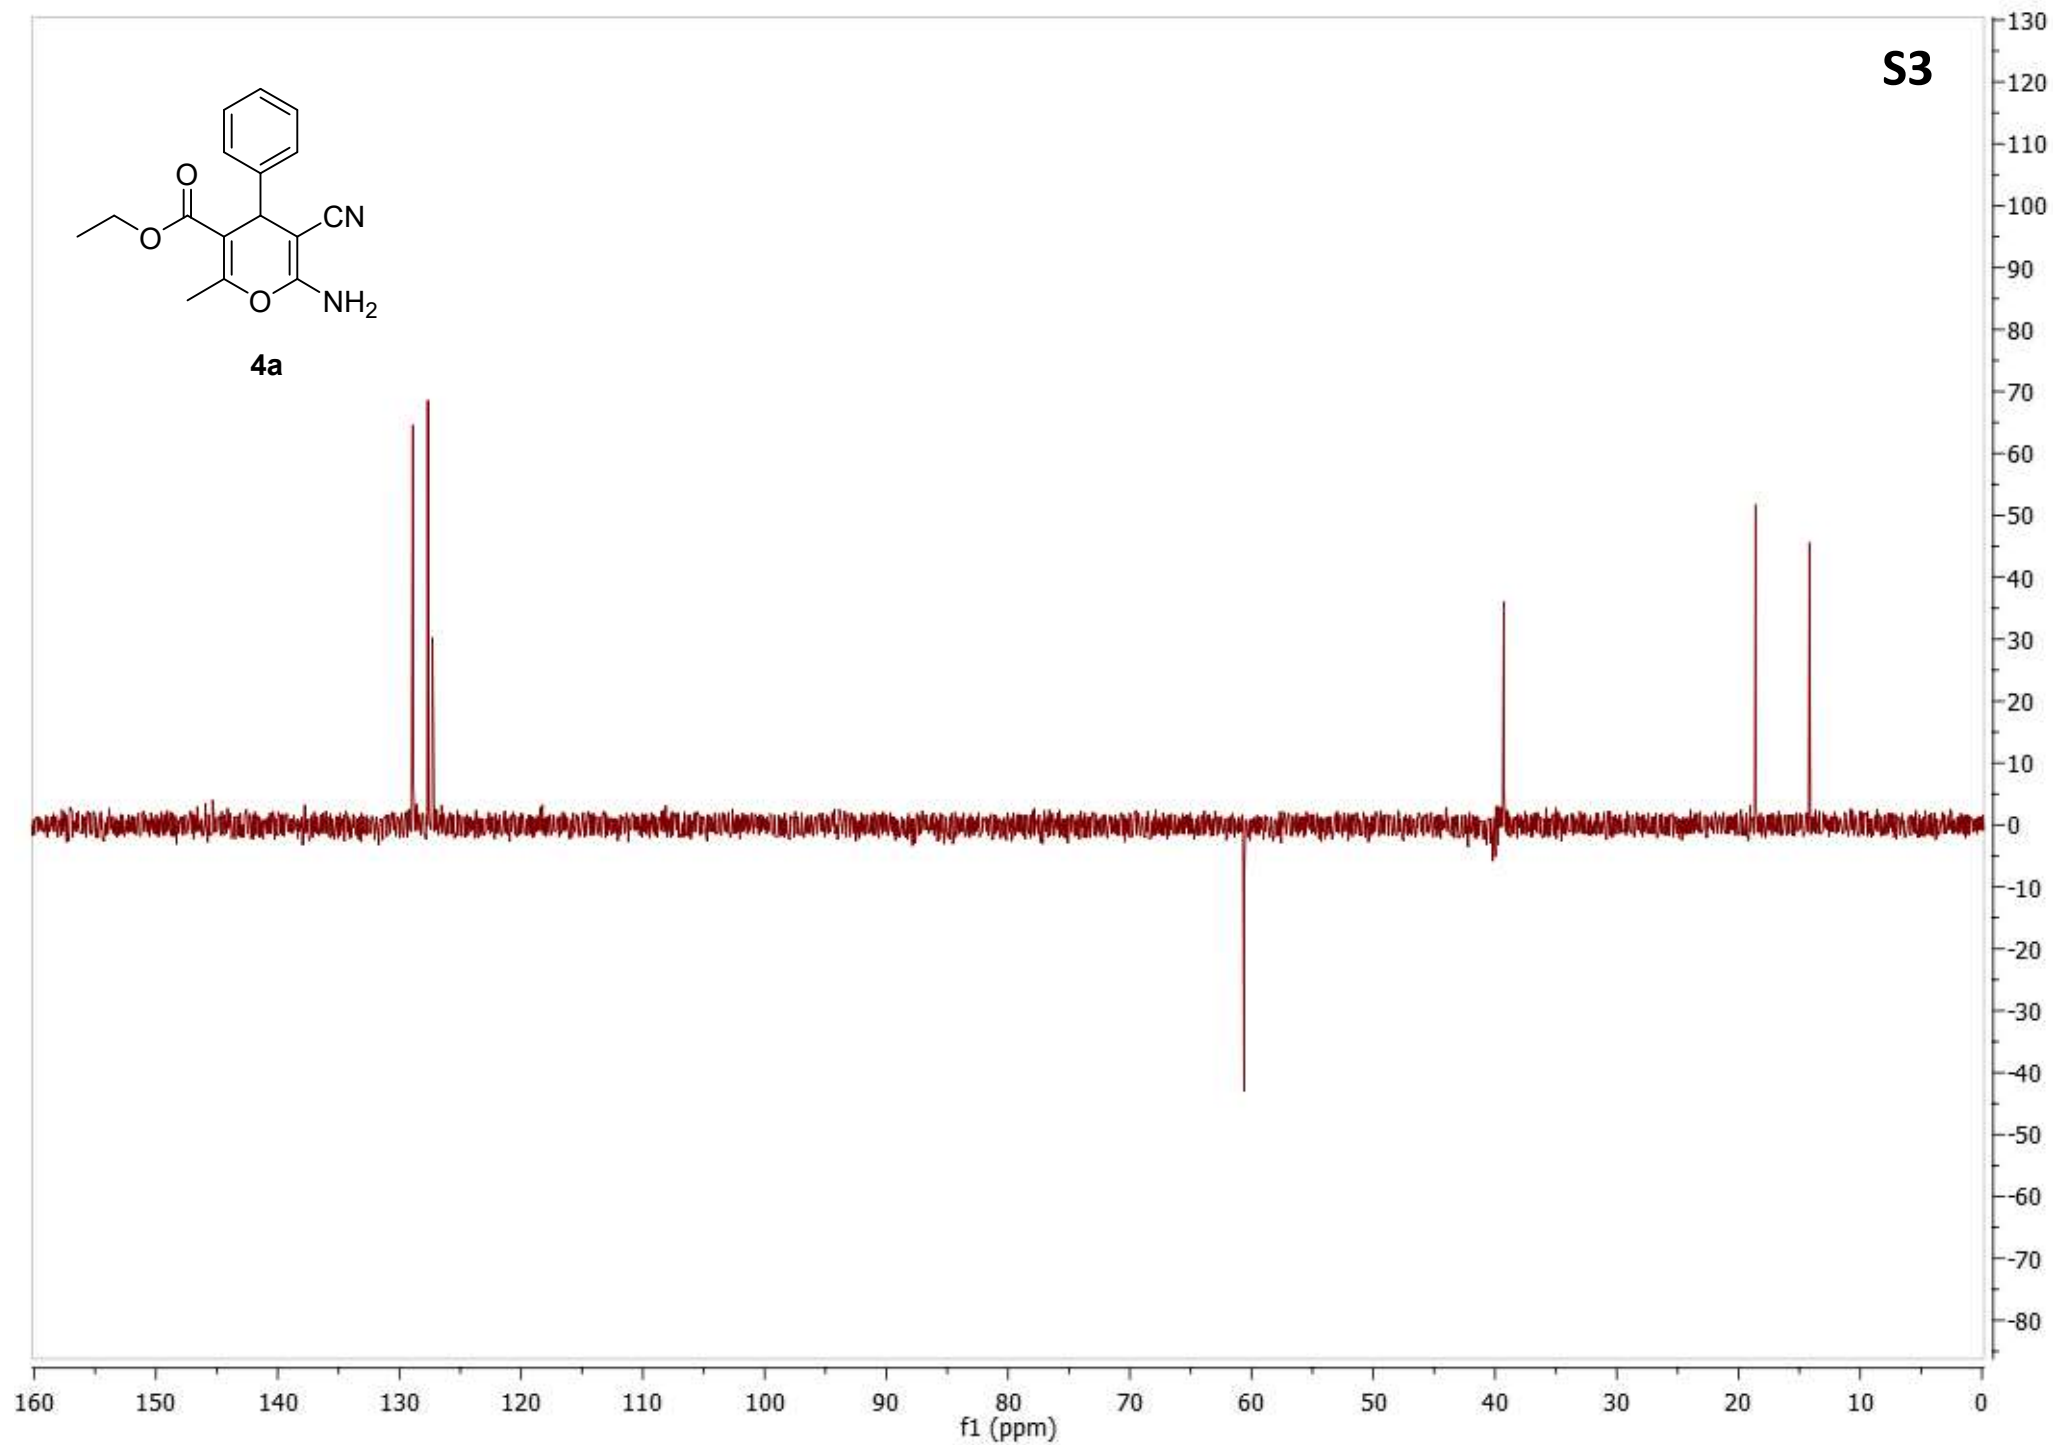

$^{13}\text{C}$  NMR APT (DMSO- $d_6$ ) **4a**

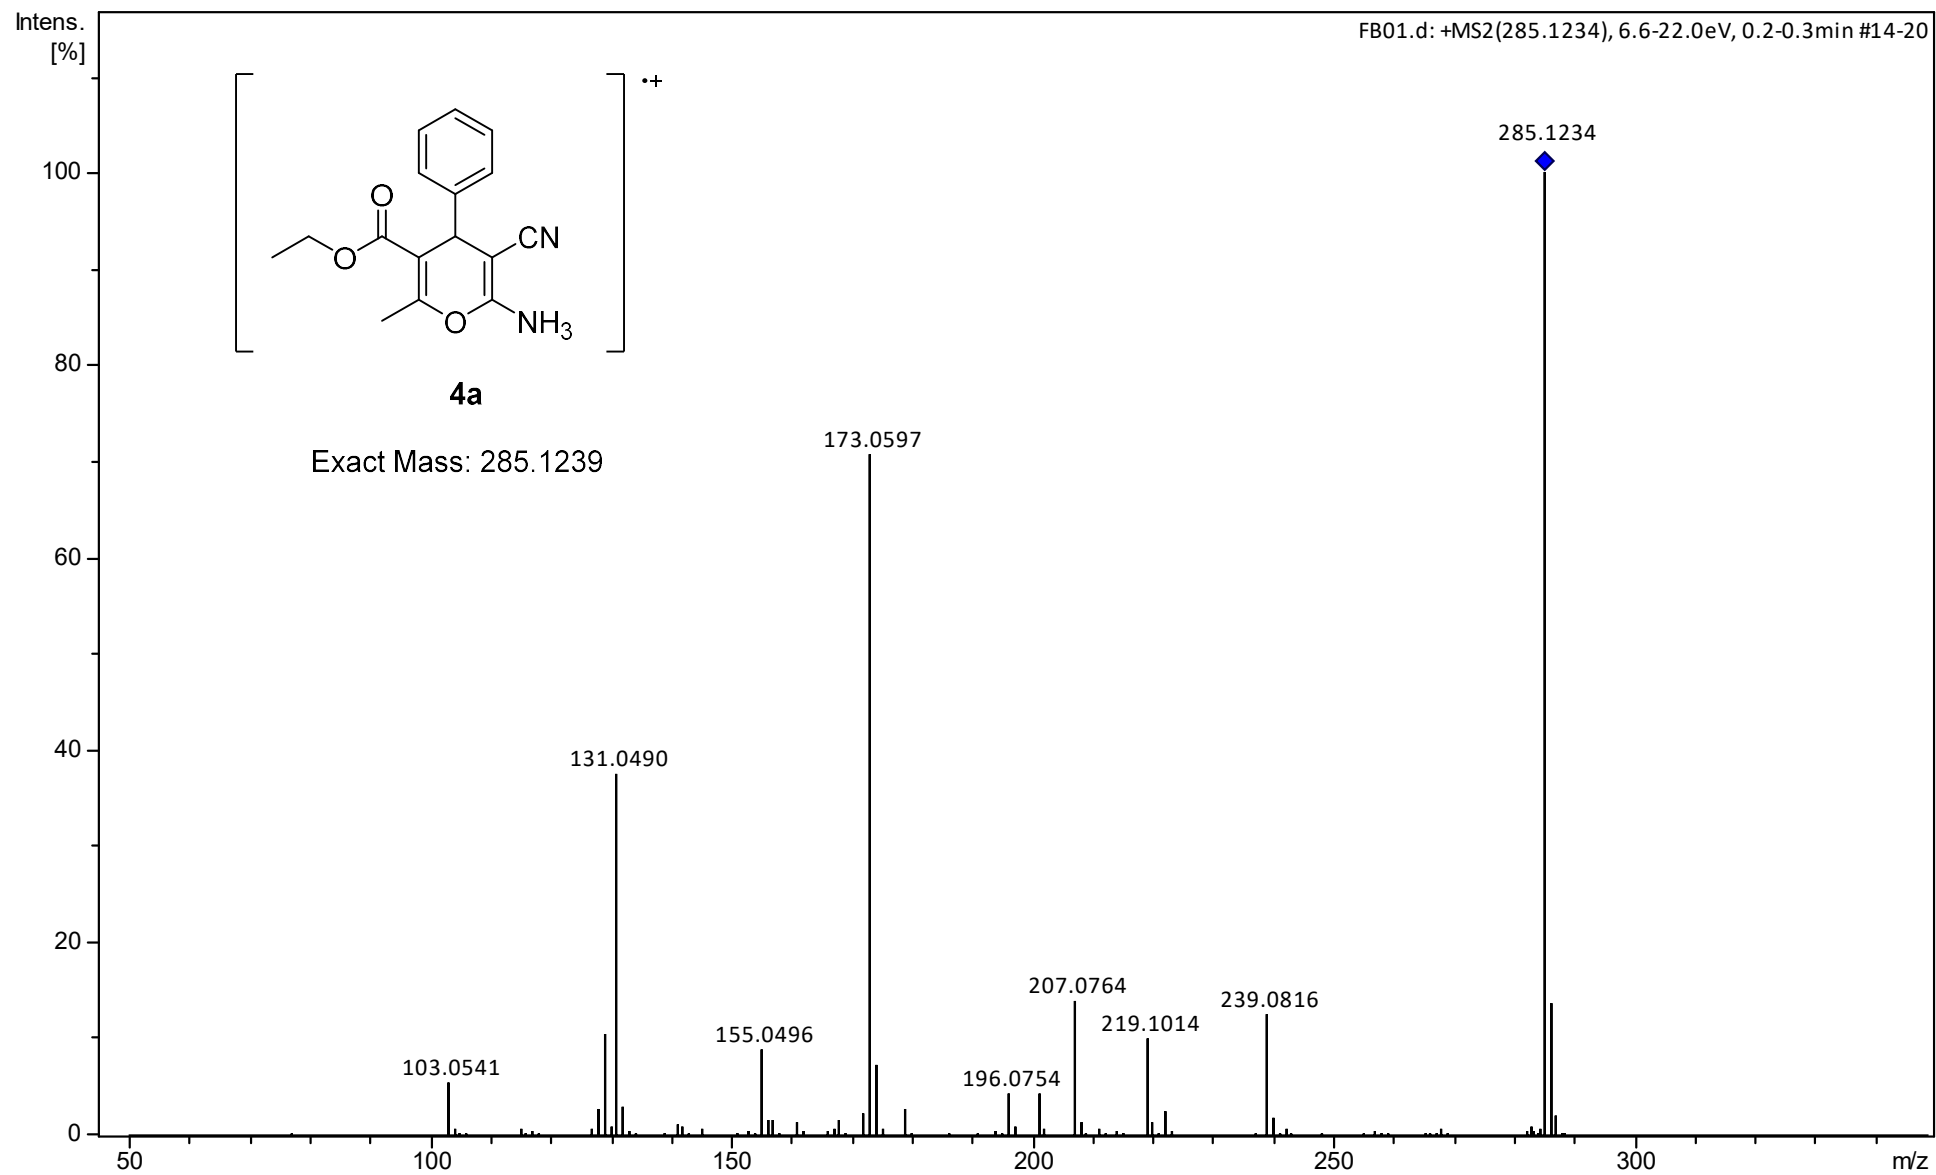HRMS **4a**

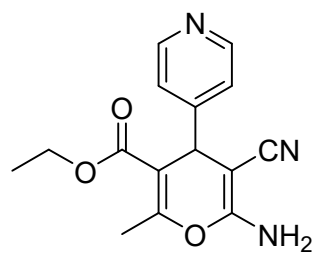**4b**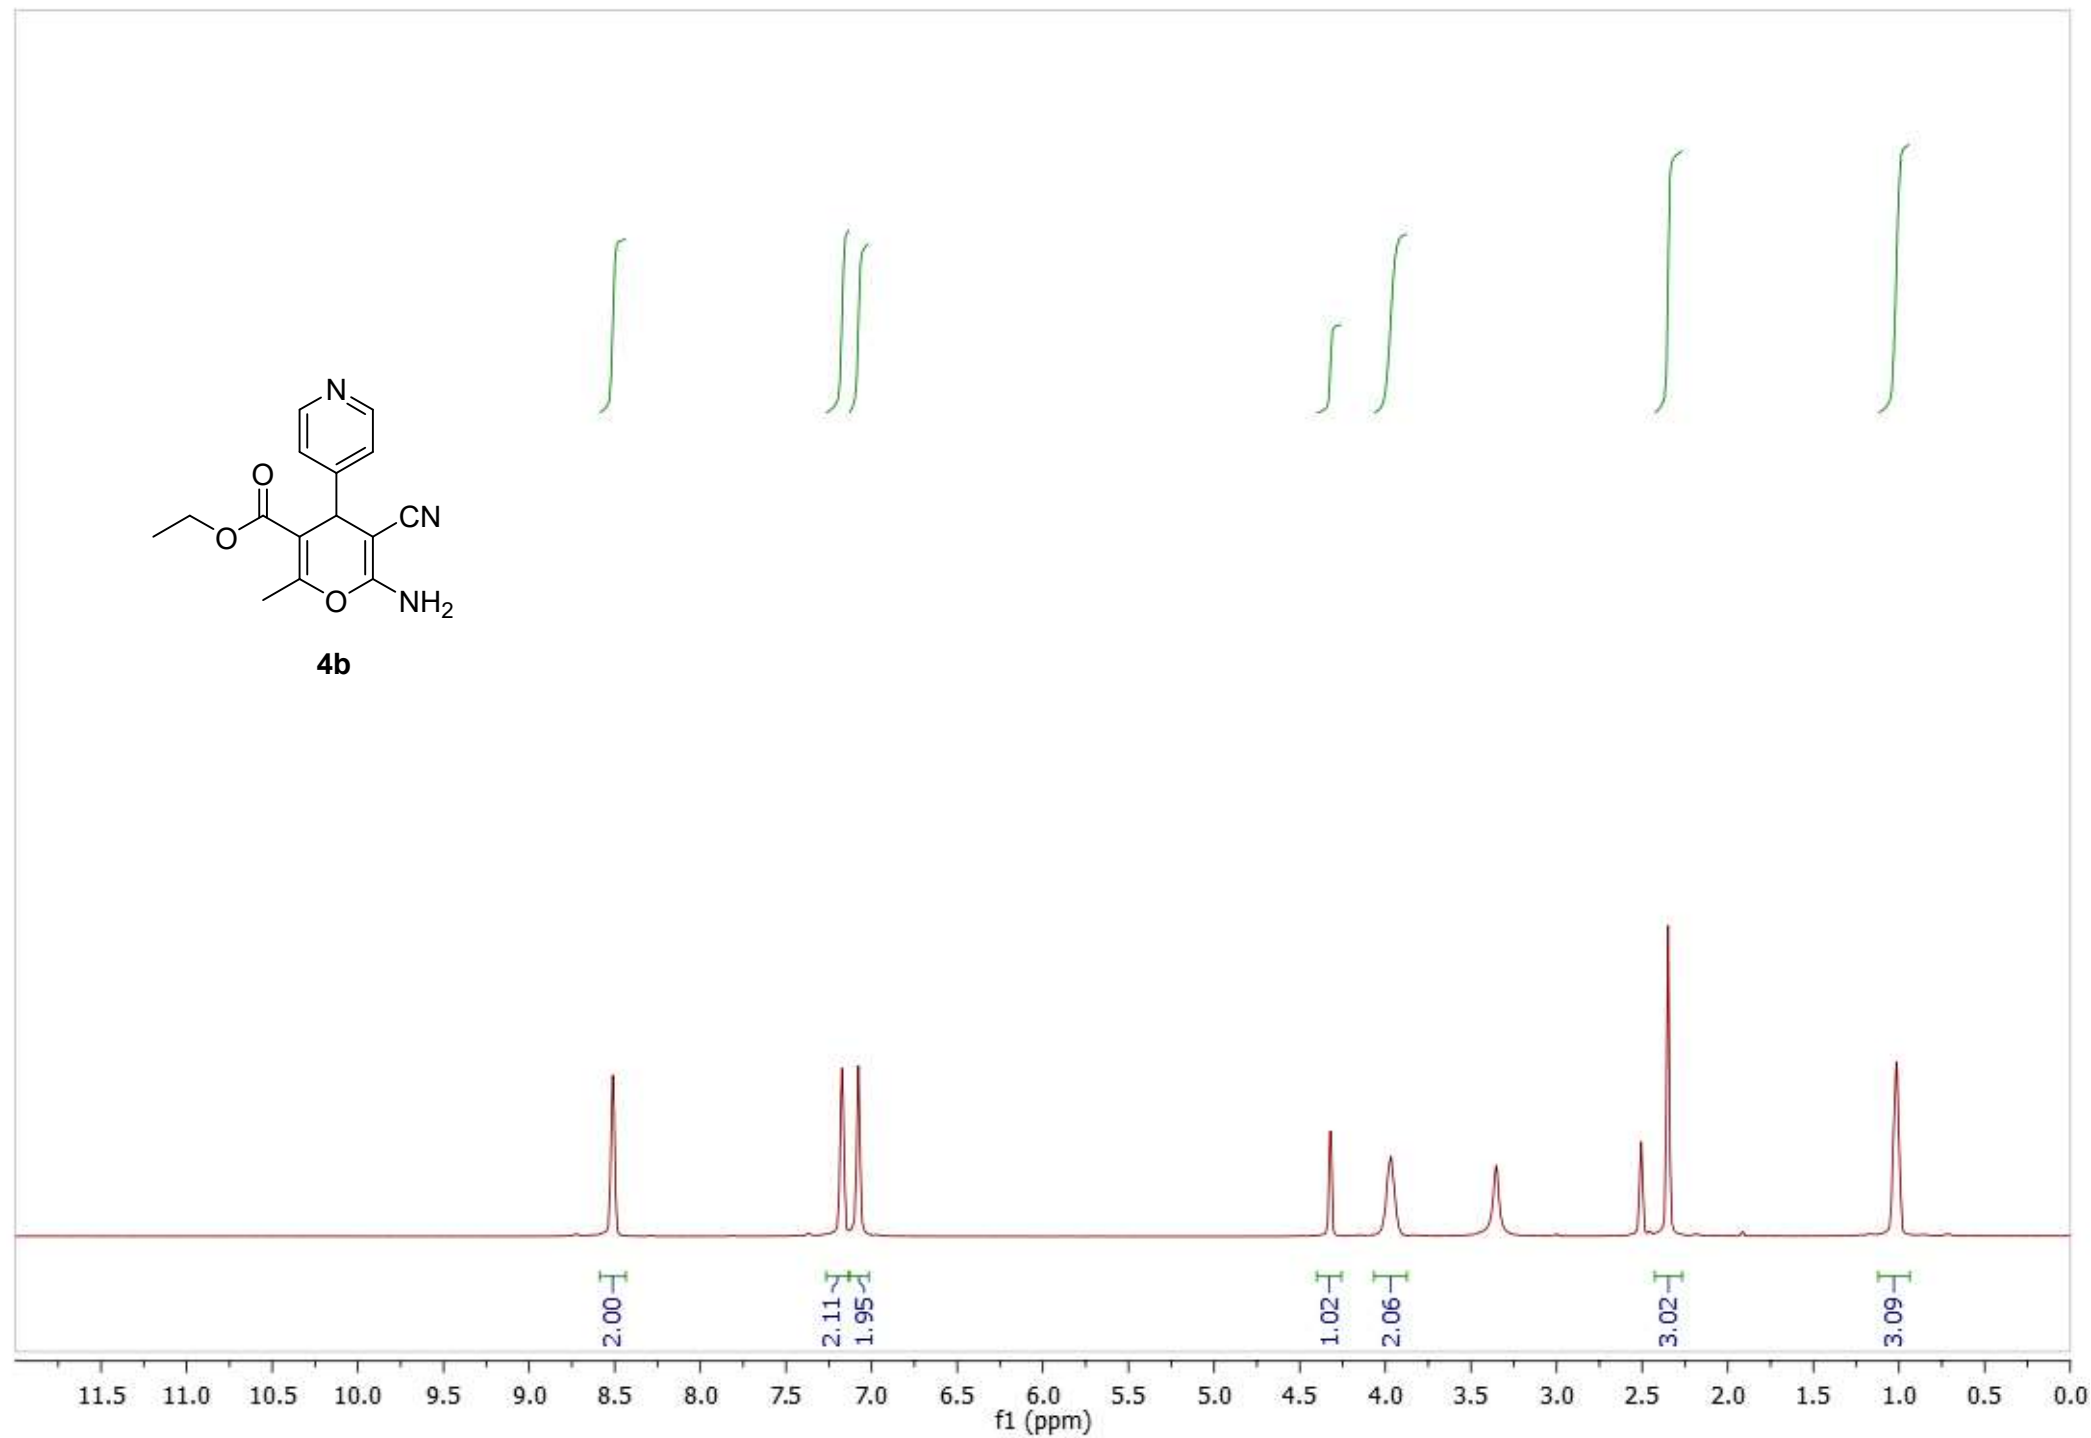<sup>1</sup>H NMR (DMSO-*d*<sub>6</sub>) **4b**

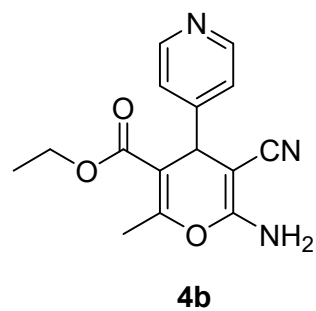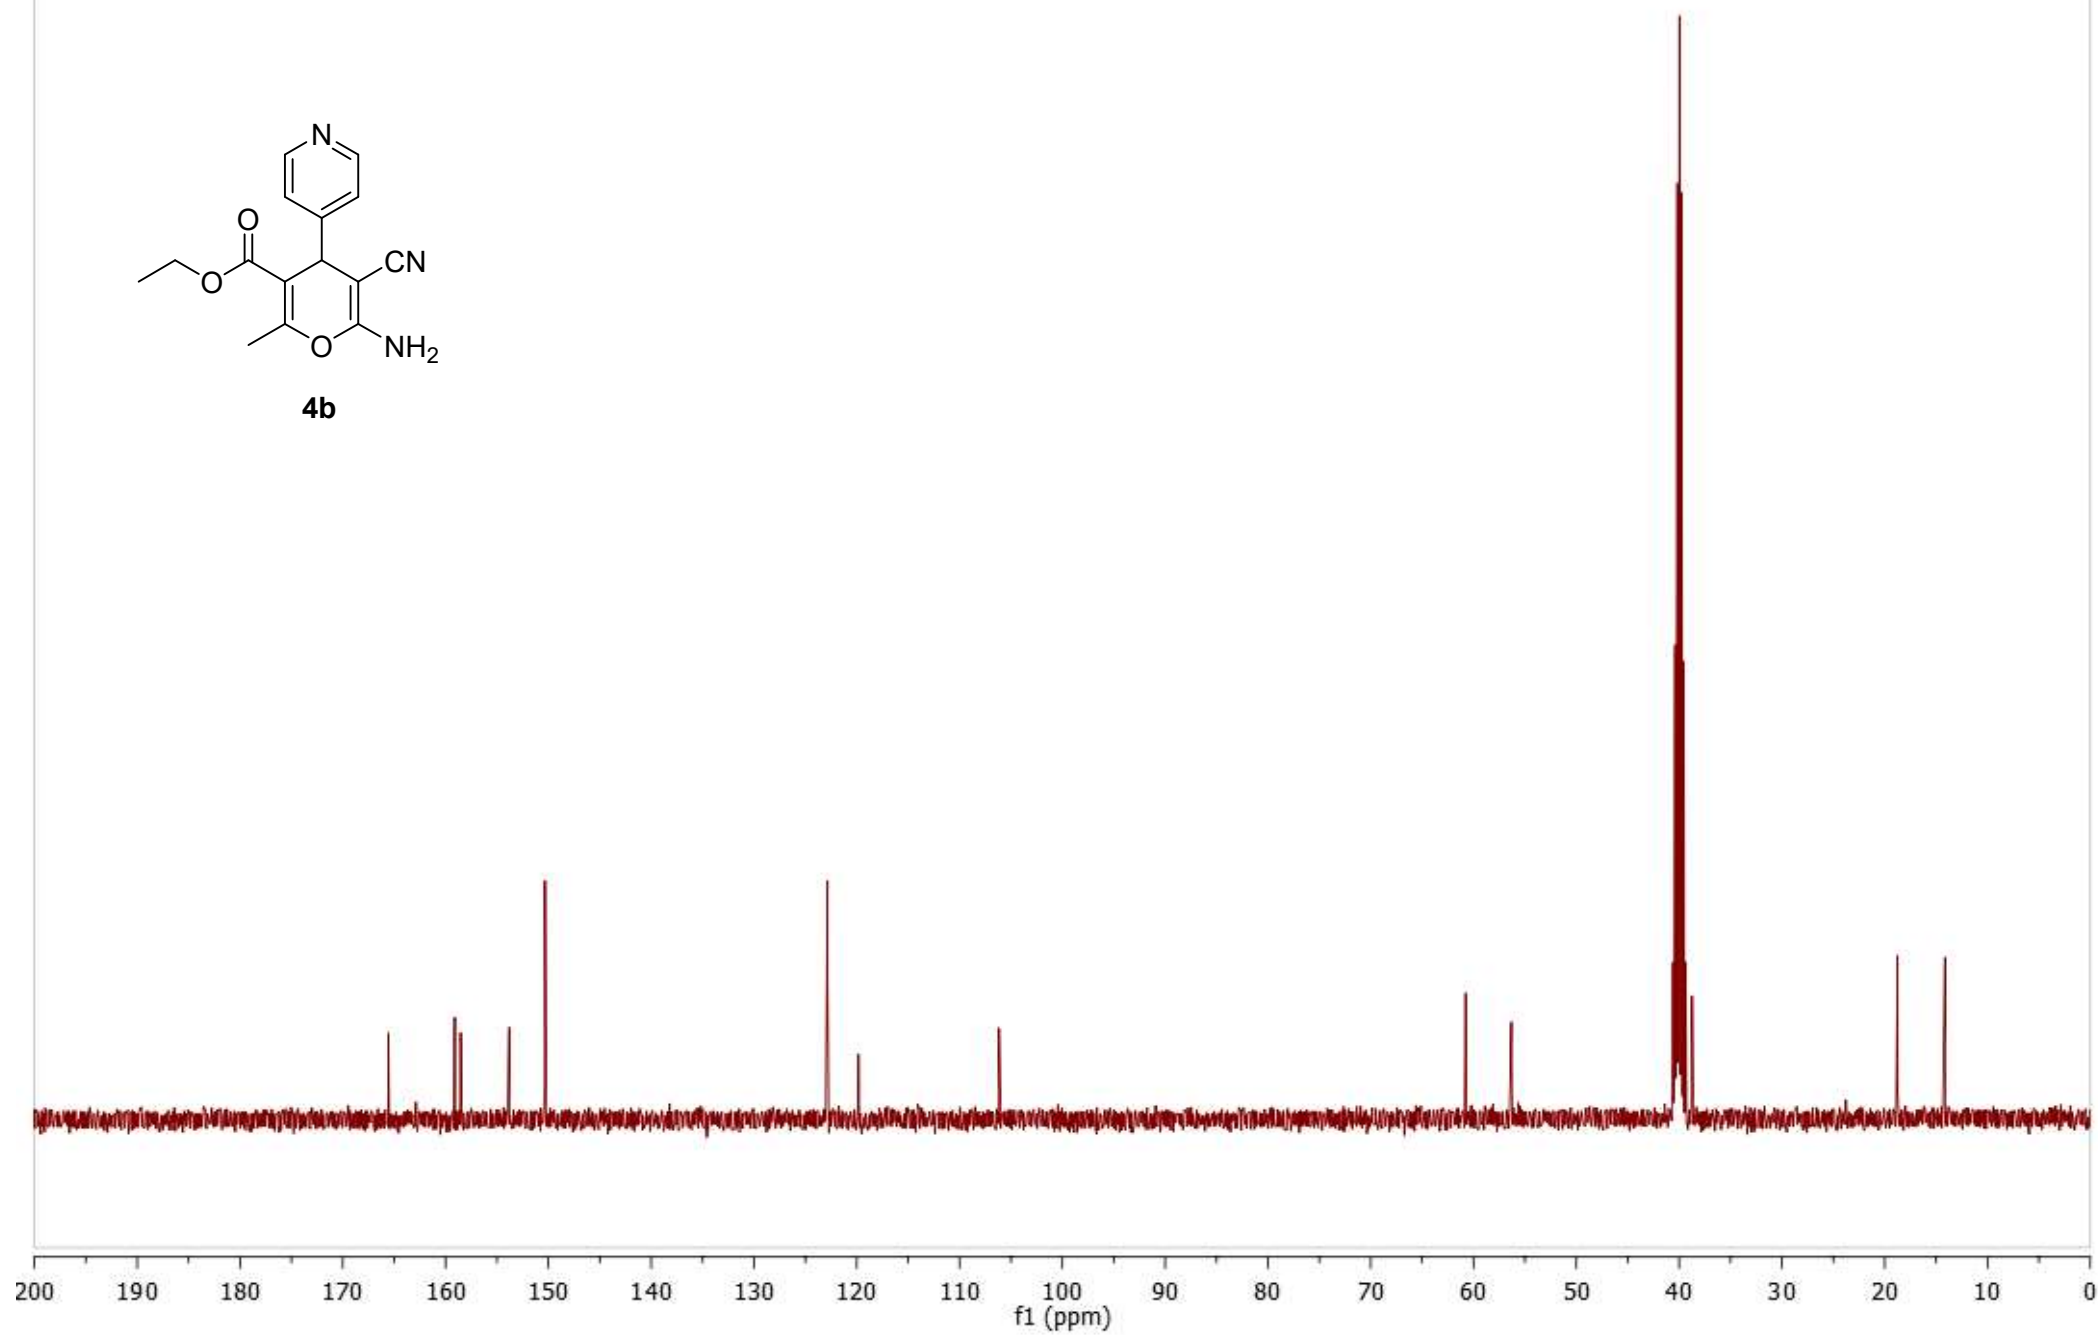

$^{13}\text{C}$  NMR (DMSO- $d_6$ ) **4b**

S7

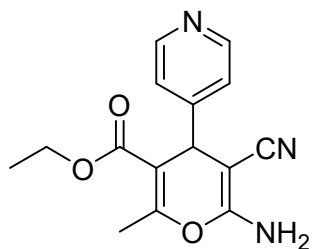

4b

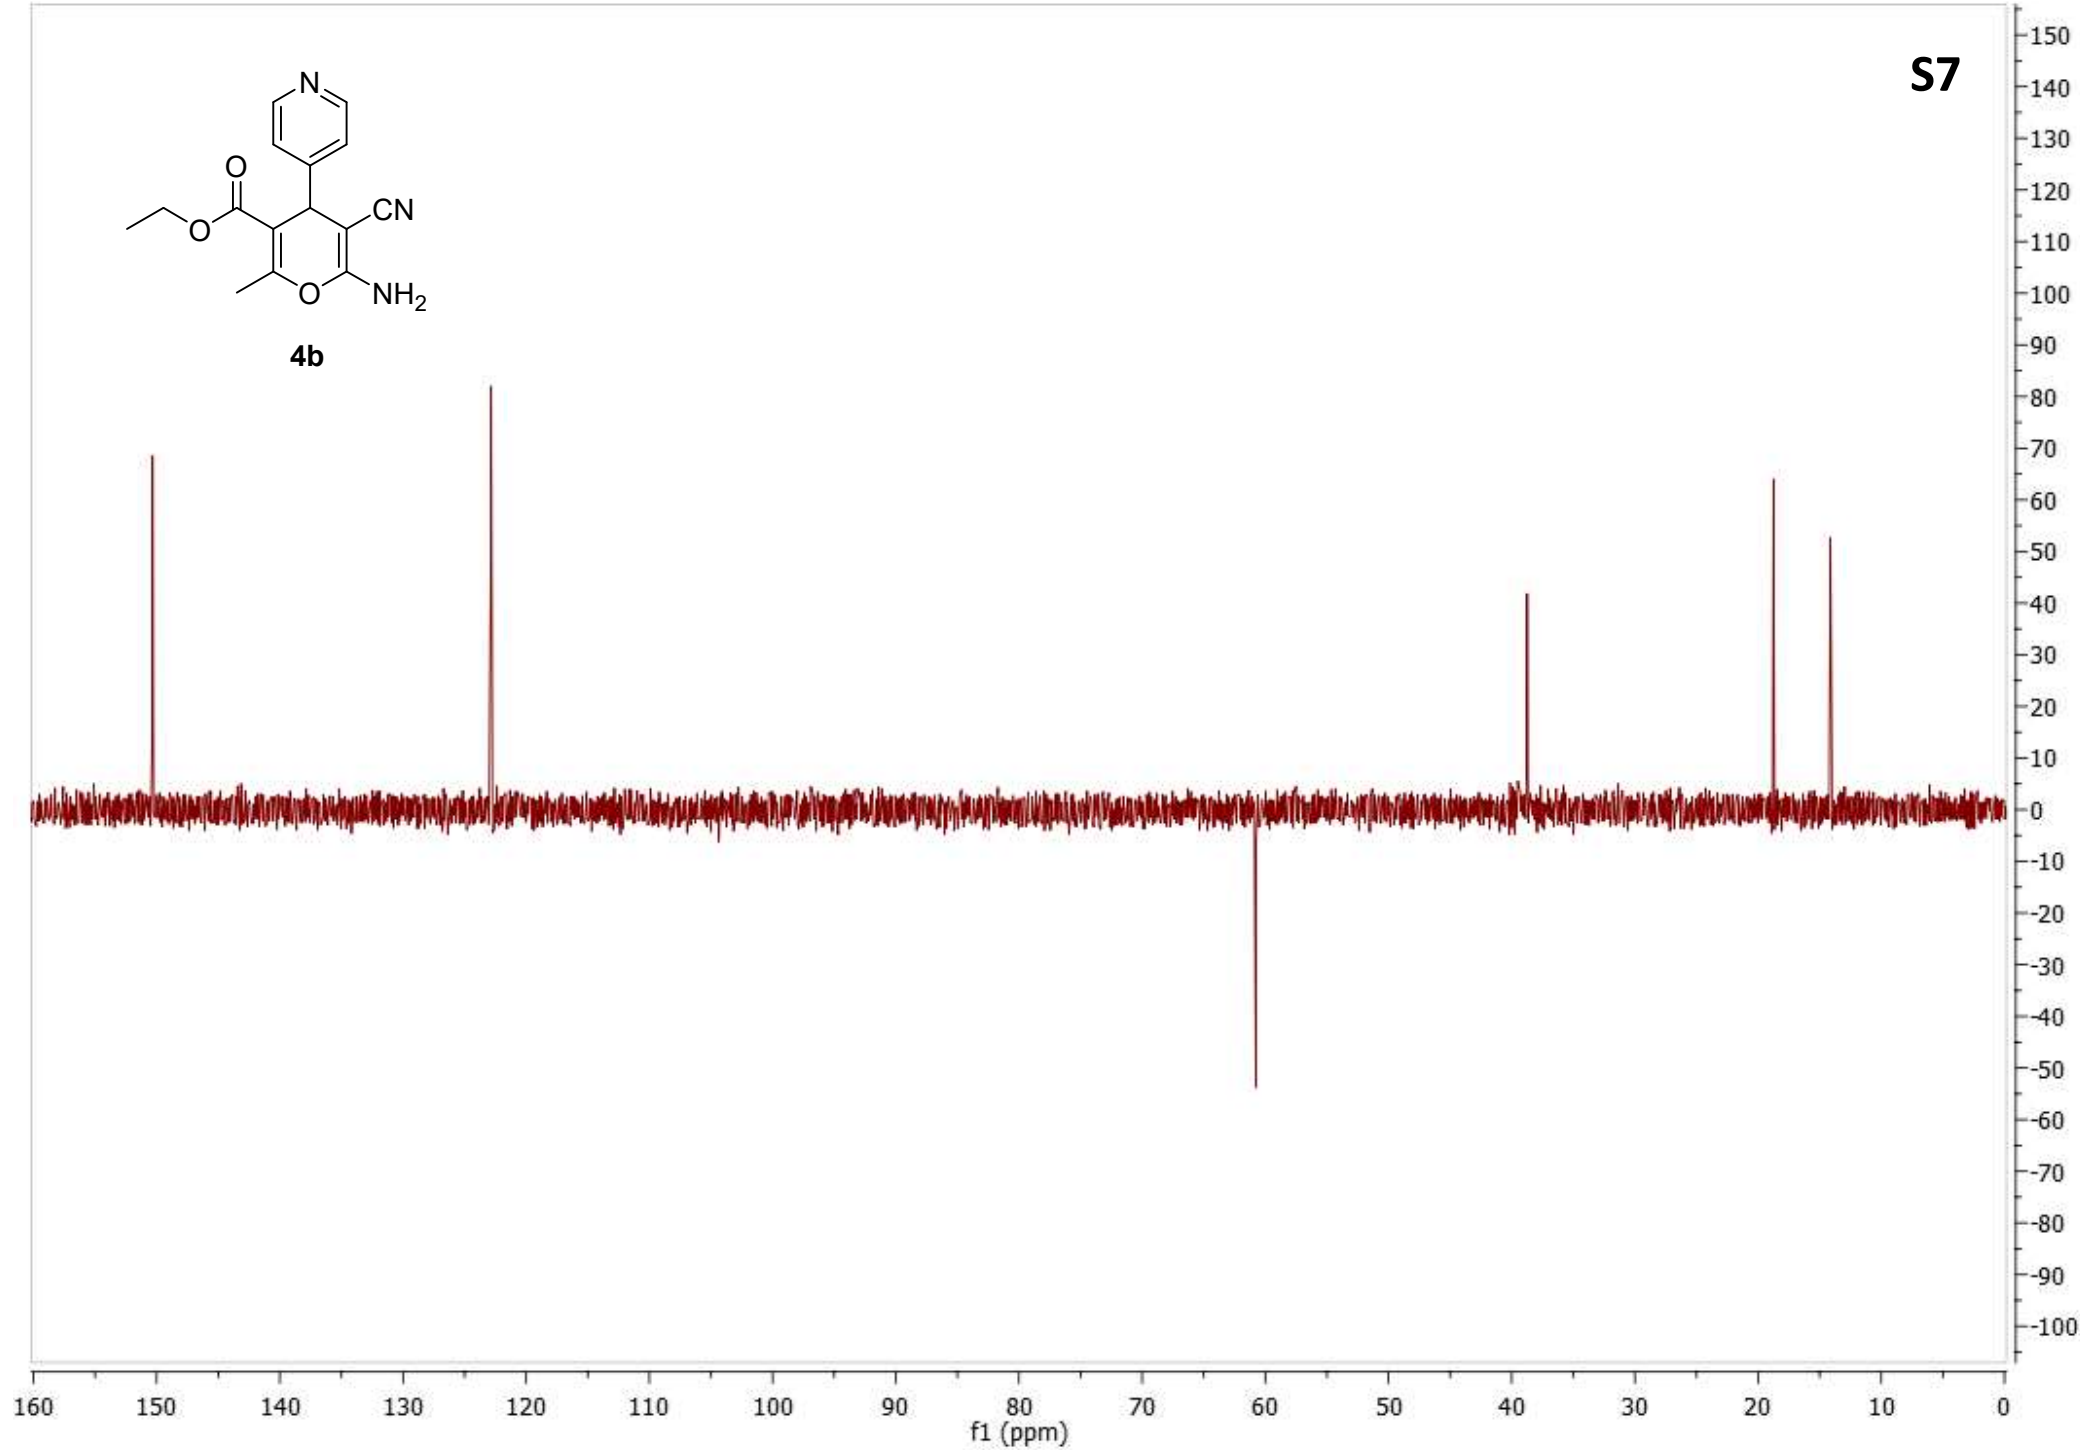

$^{13}\text{C}$  NMR APT (DMSO- $d_6$ ) 4b



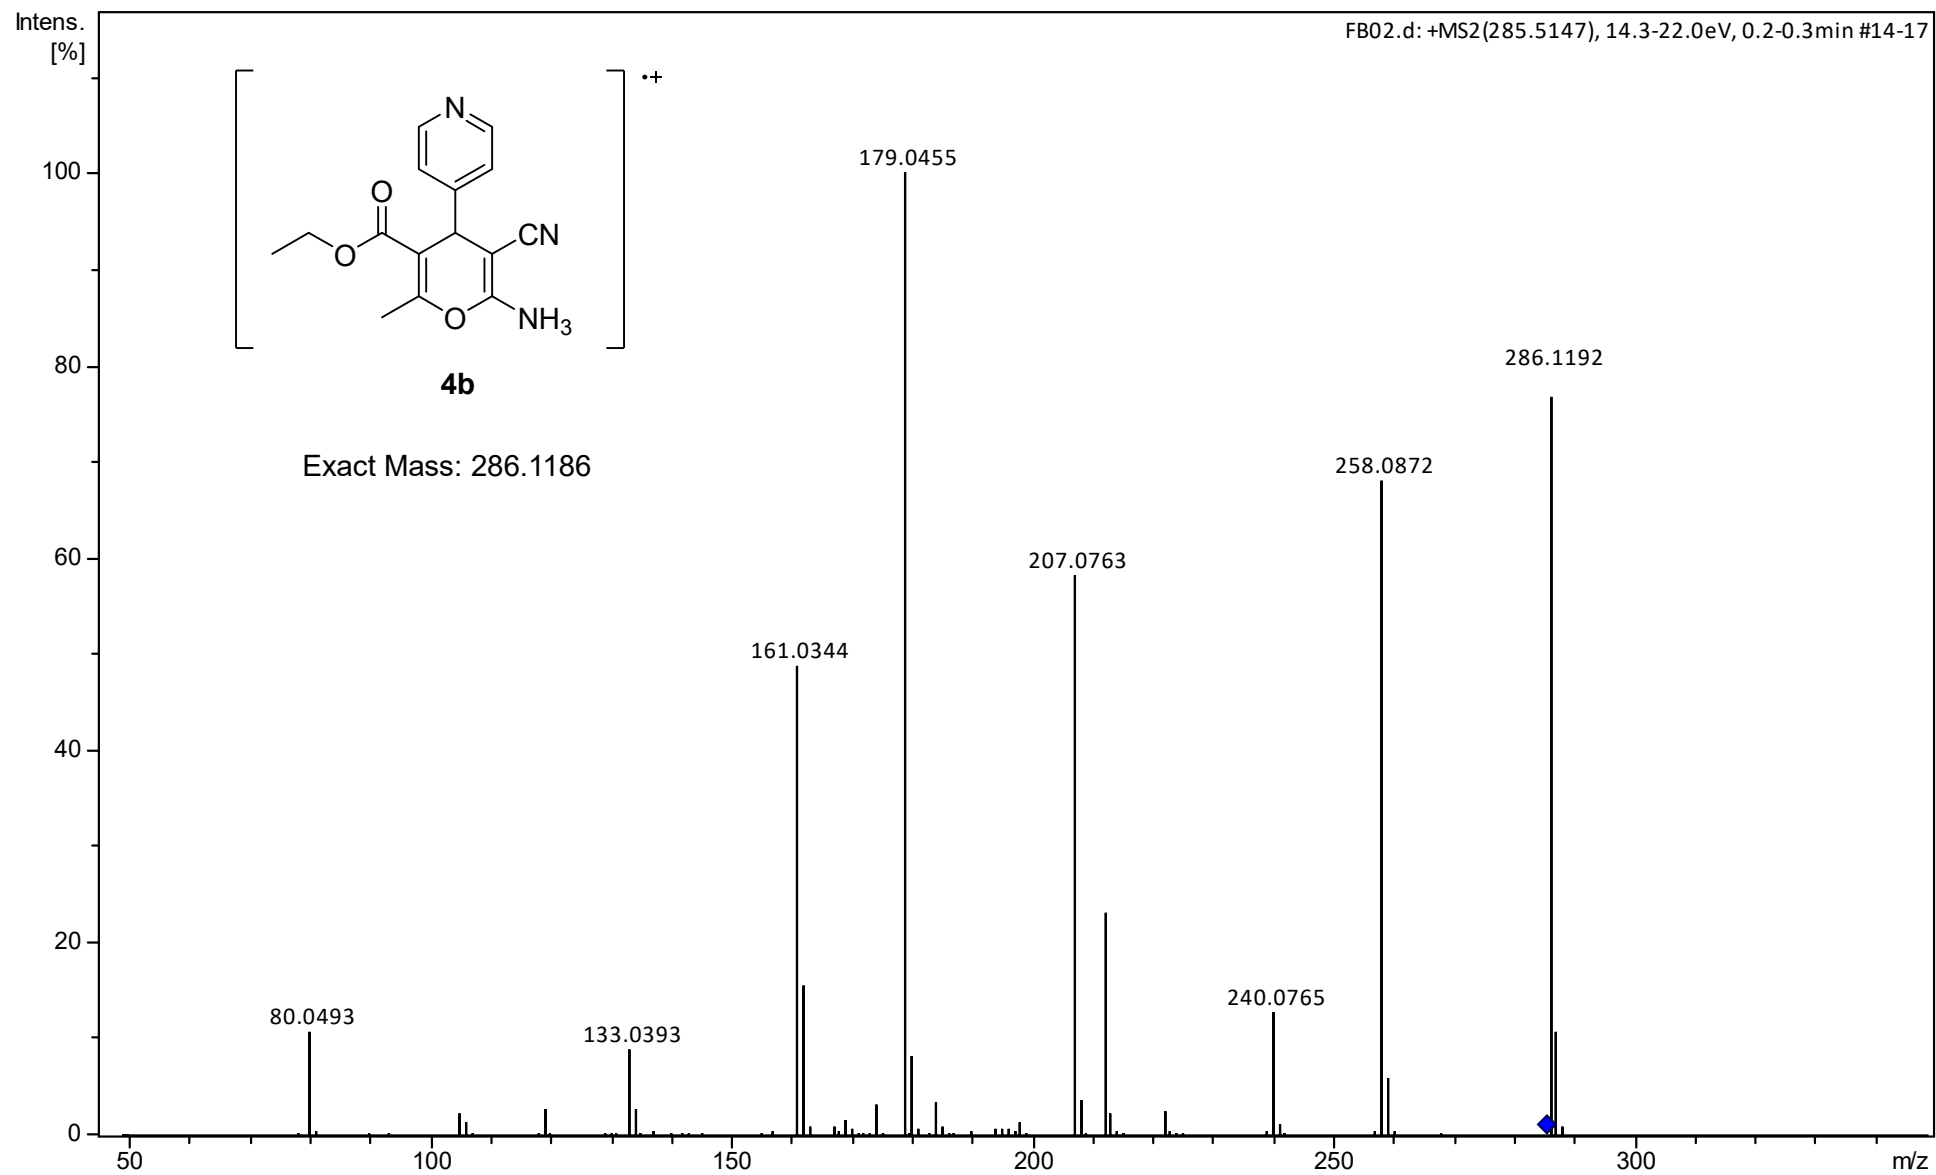HRMS **4b**

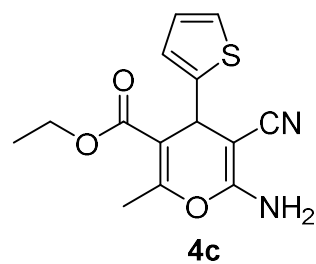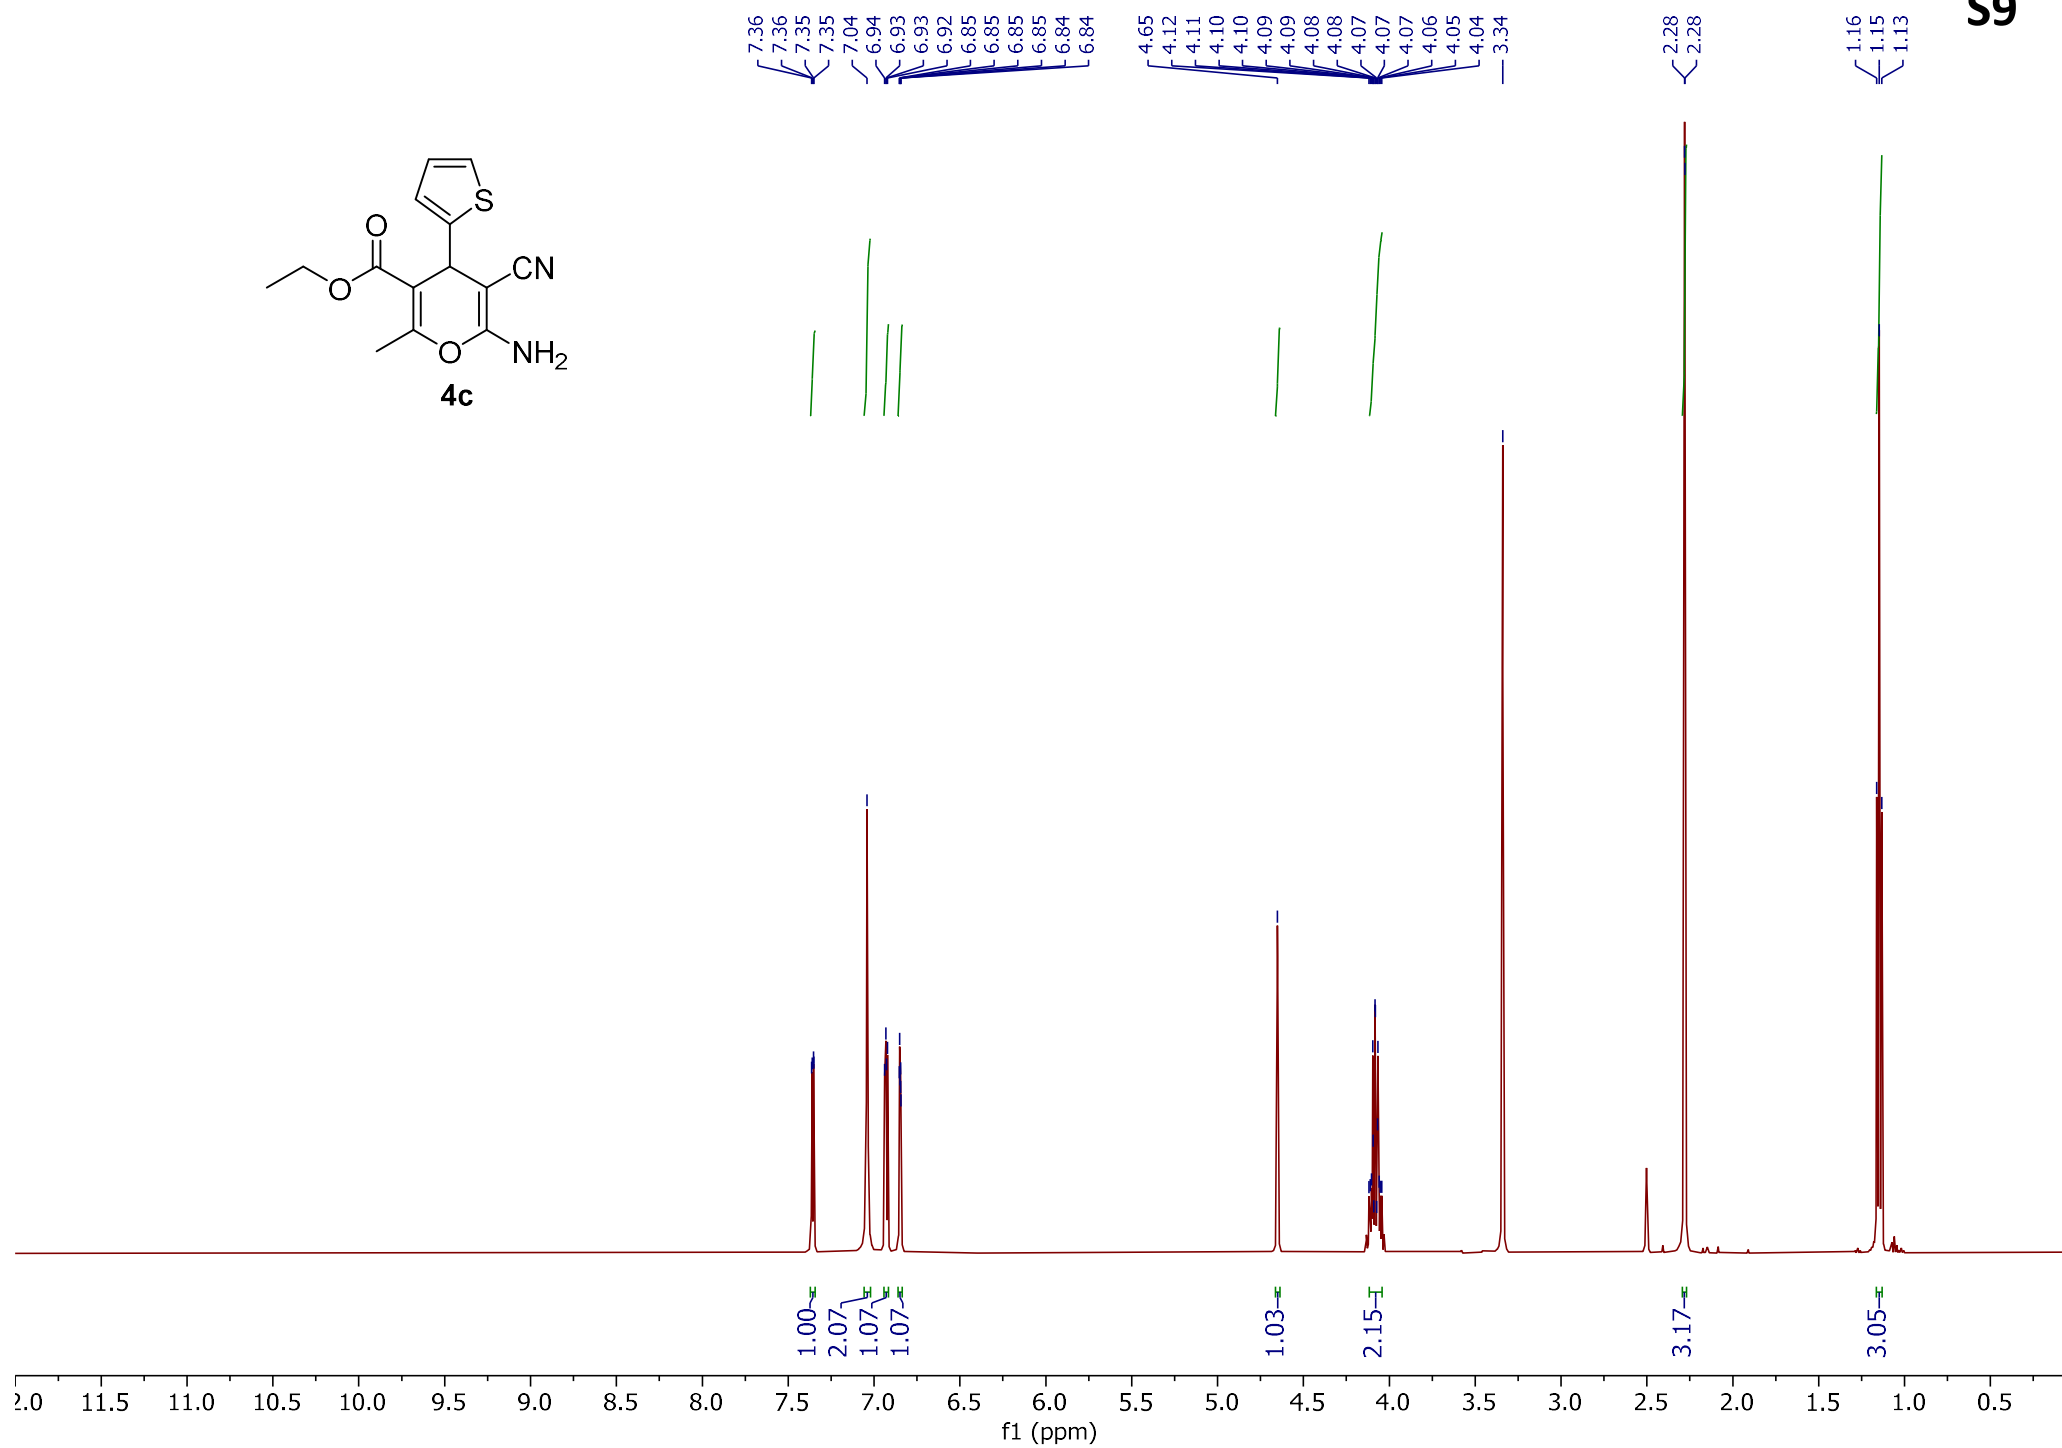

$^1\text{H}$  NMR ( $\text{DMSO}-d_6$ ) **4c**

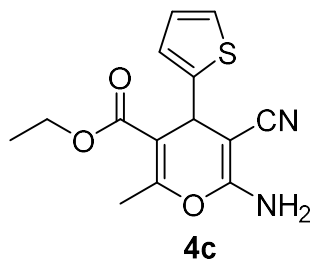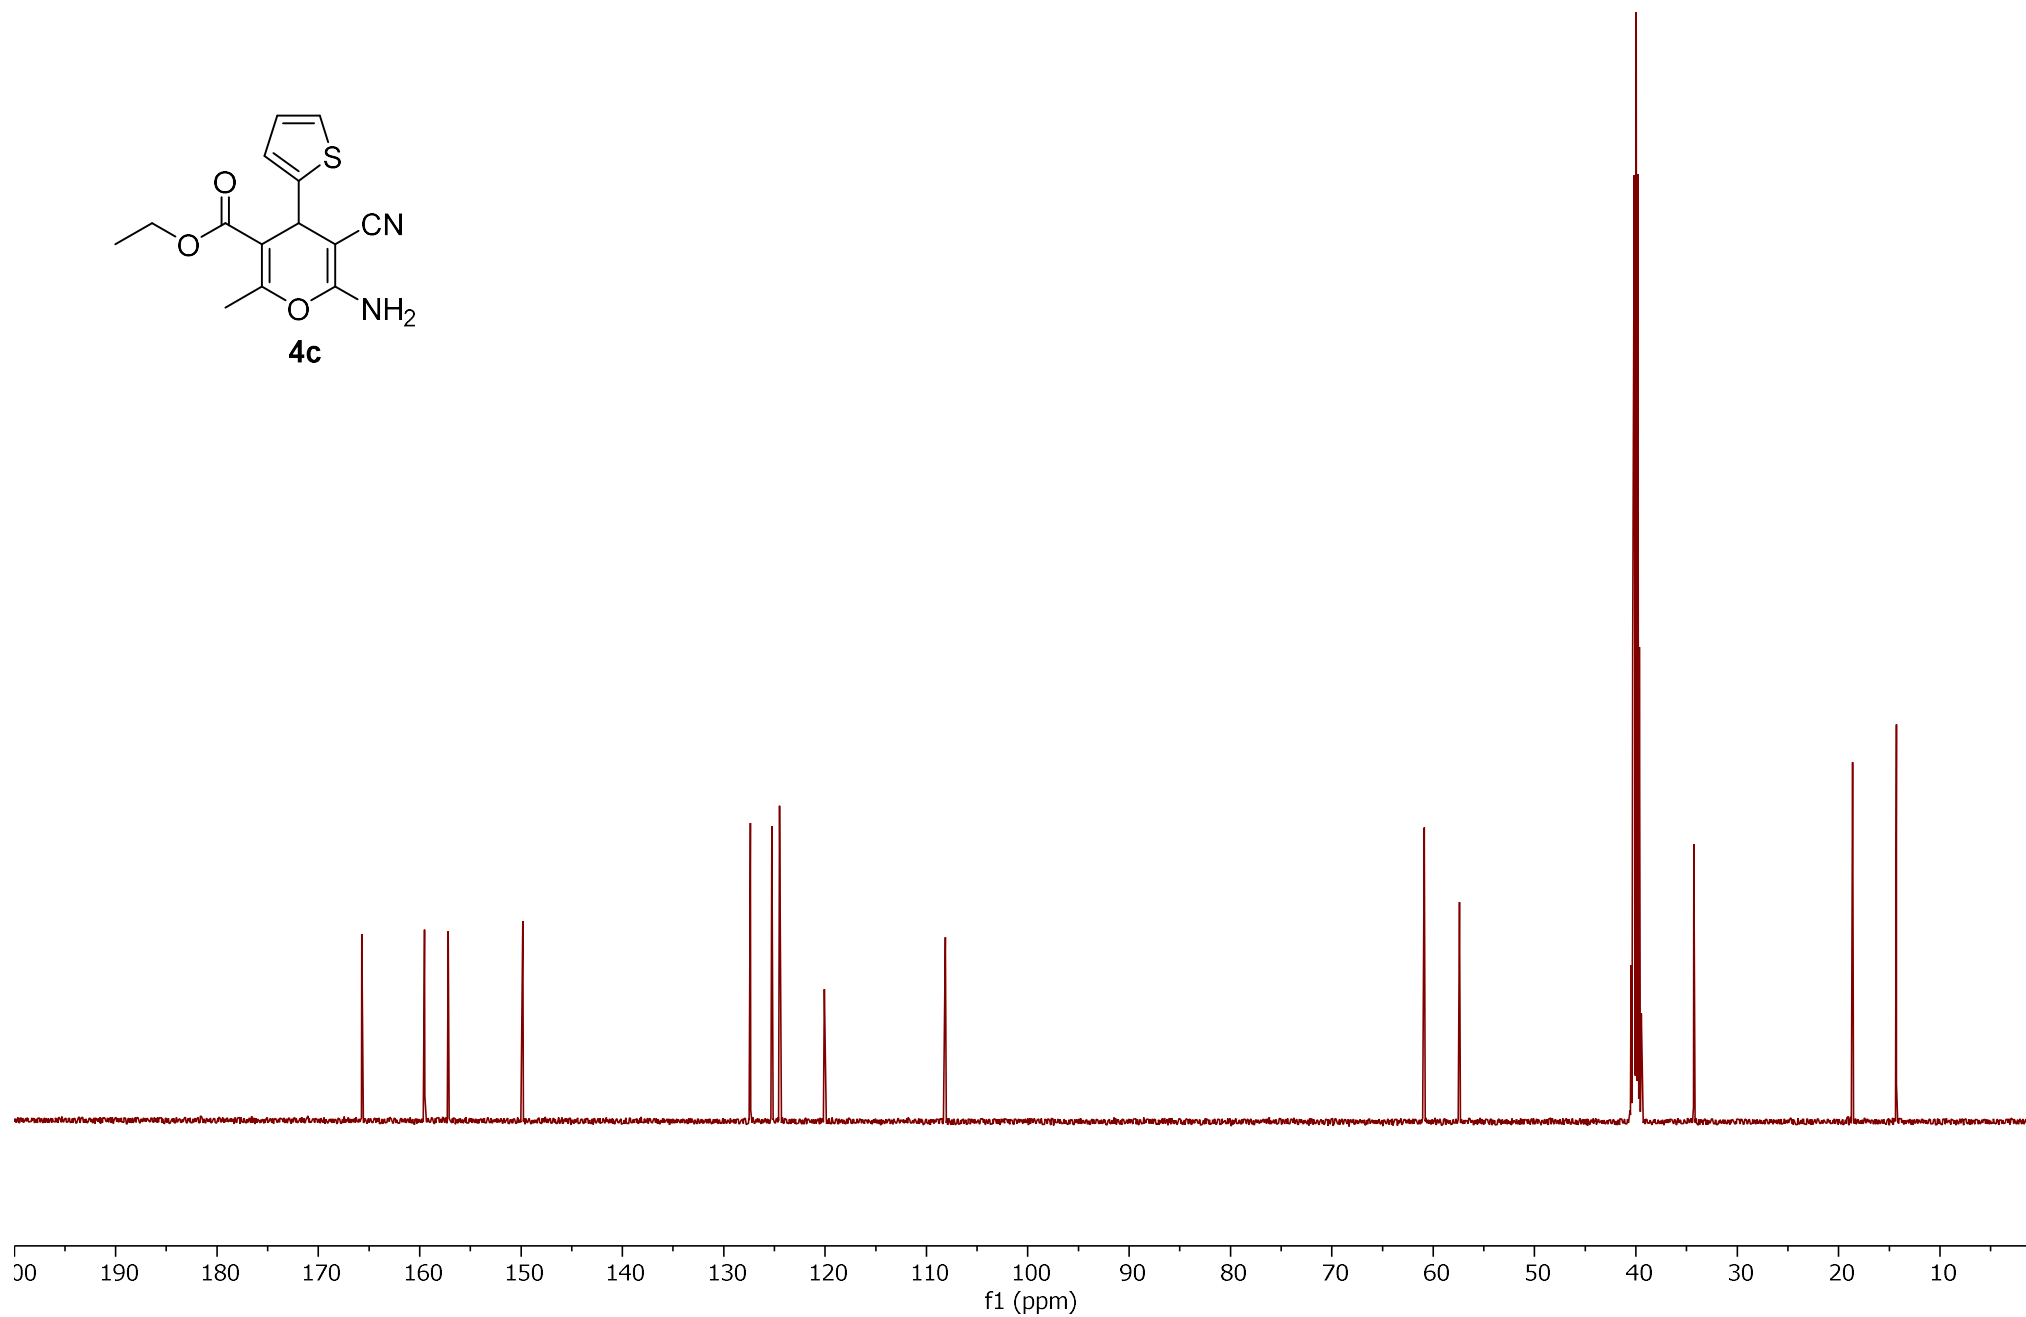

$^{13}\text{C}$  NMR (DMSO- $d_6$ ) **4c**

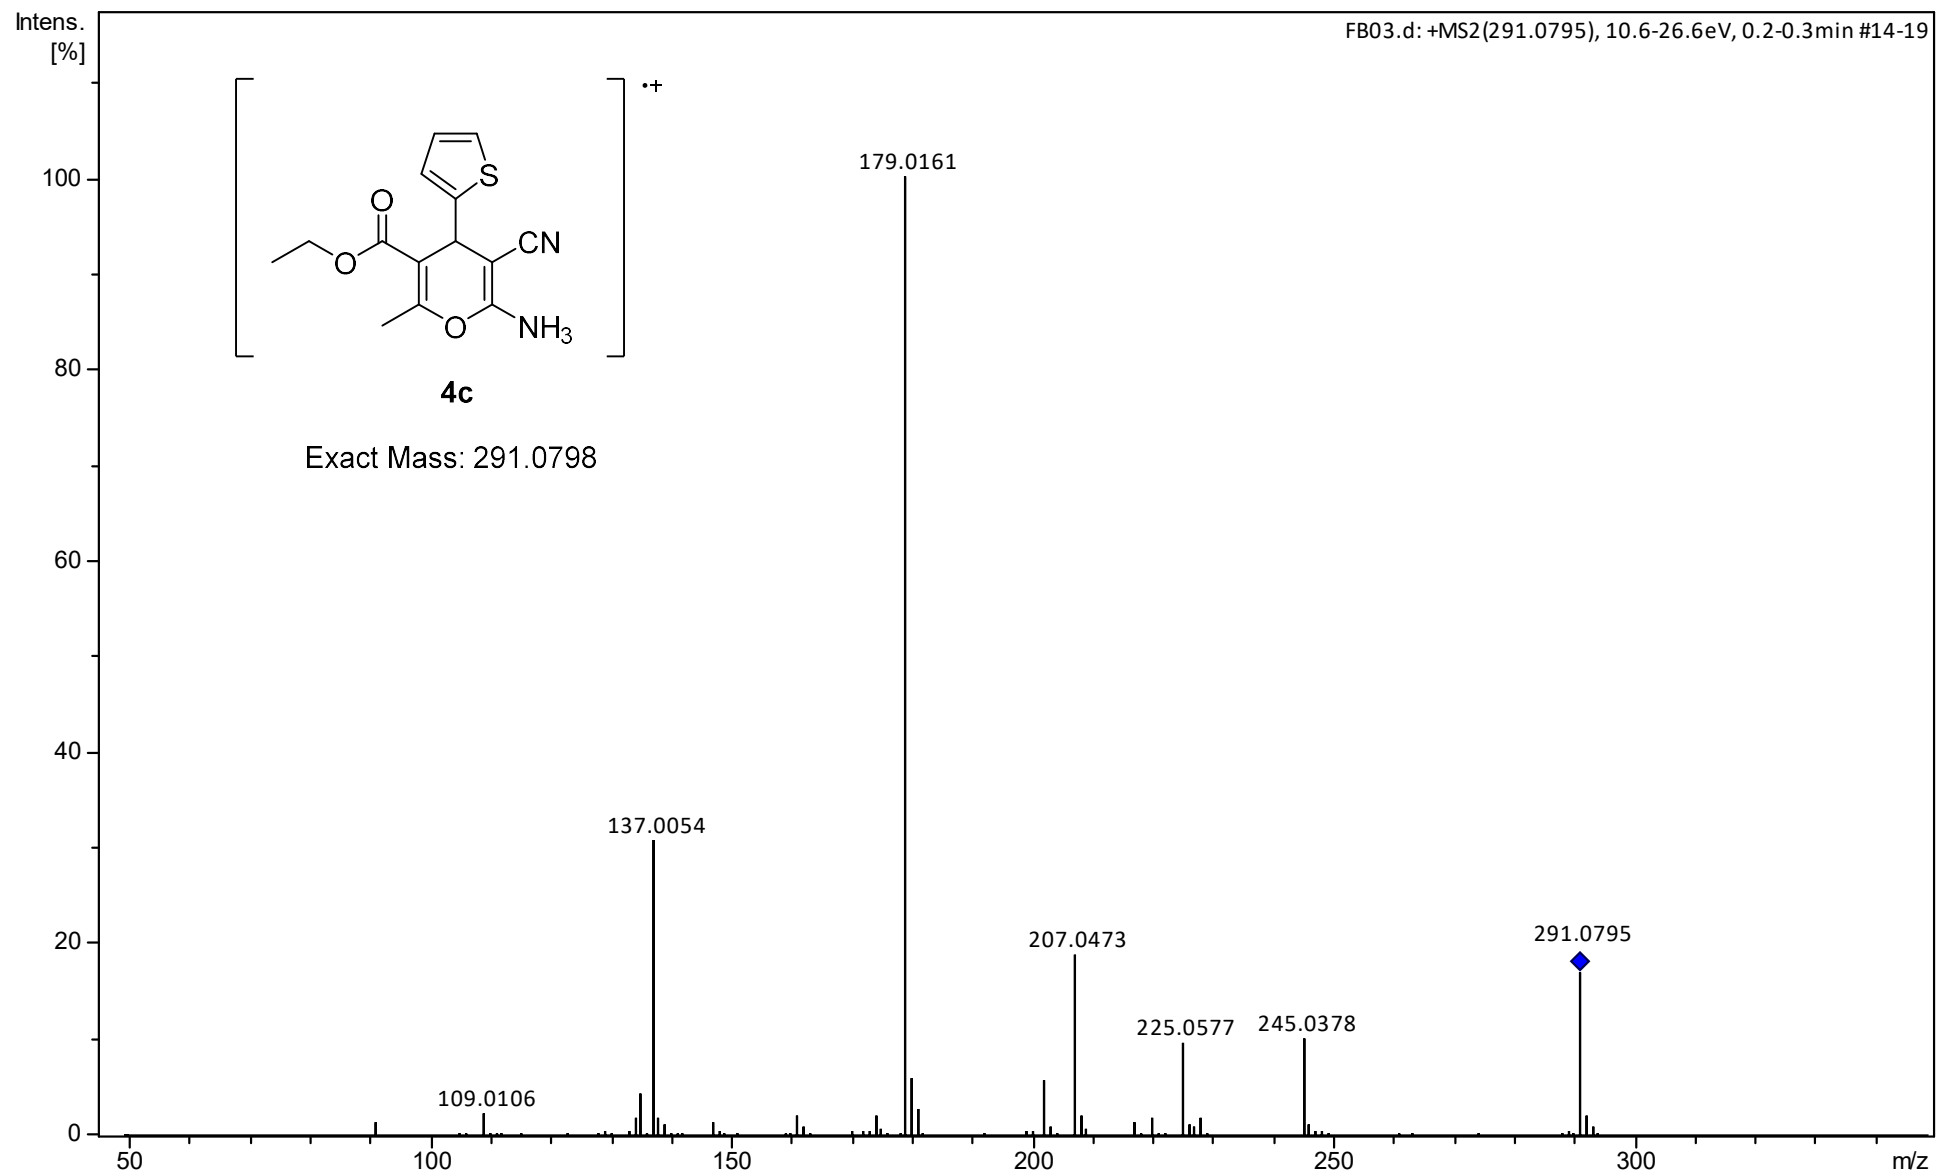HRMS **4c**

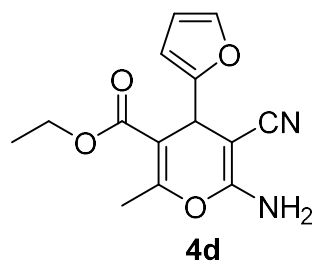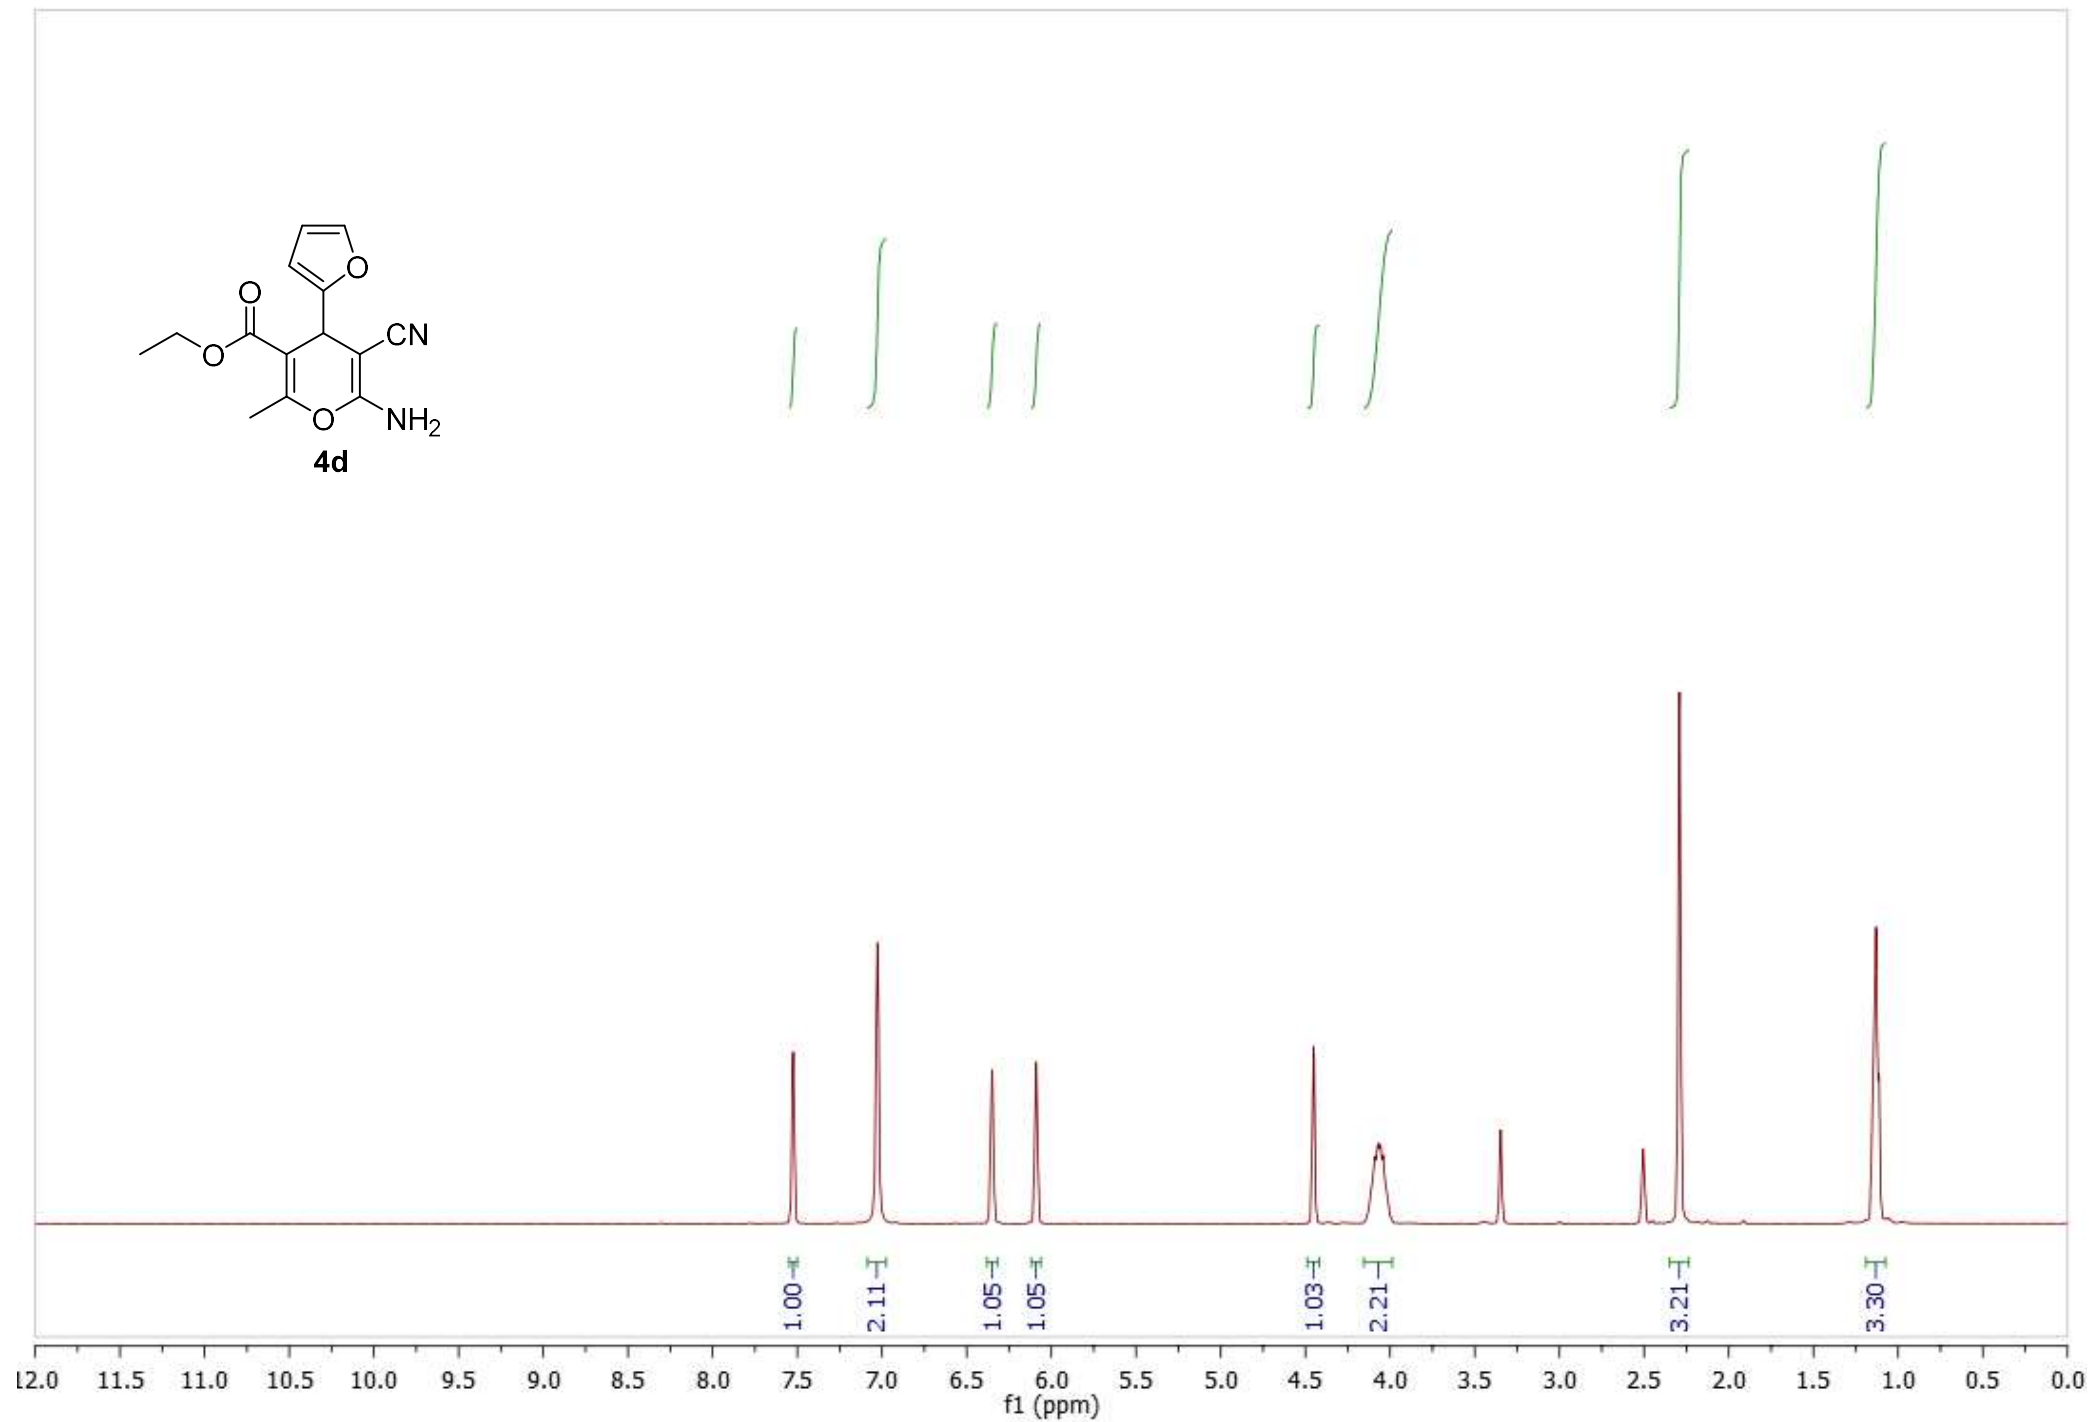 $^1\text{H}$  NMR (DMSO- $d_6$ ) **4d**

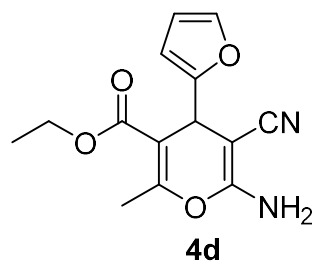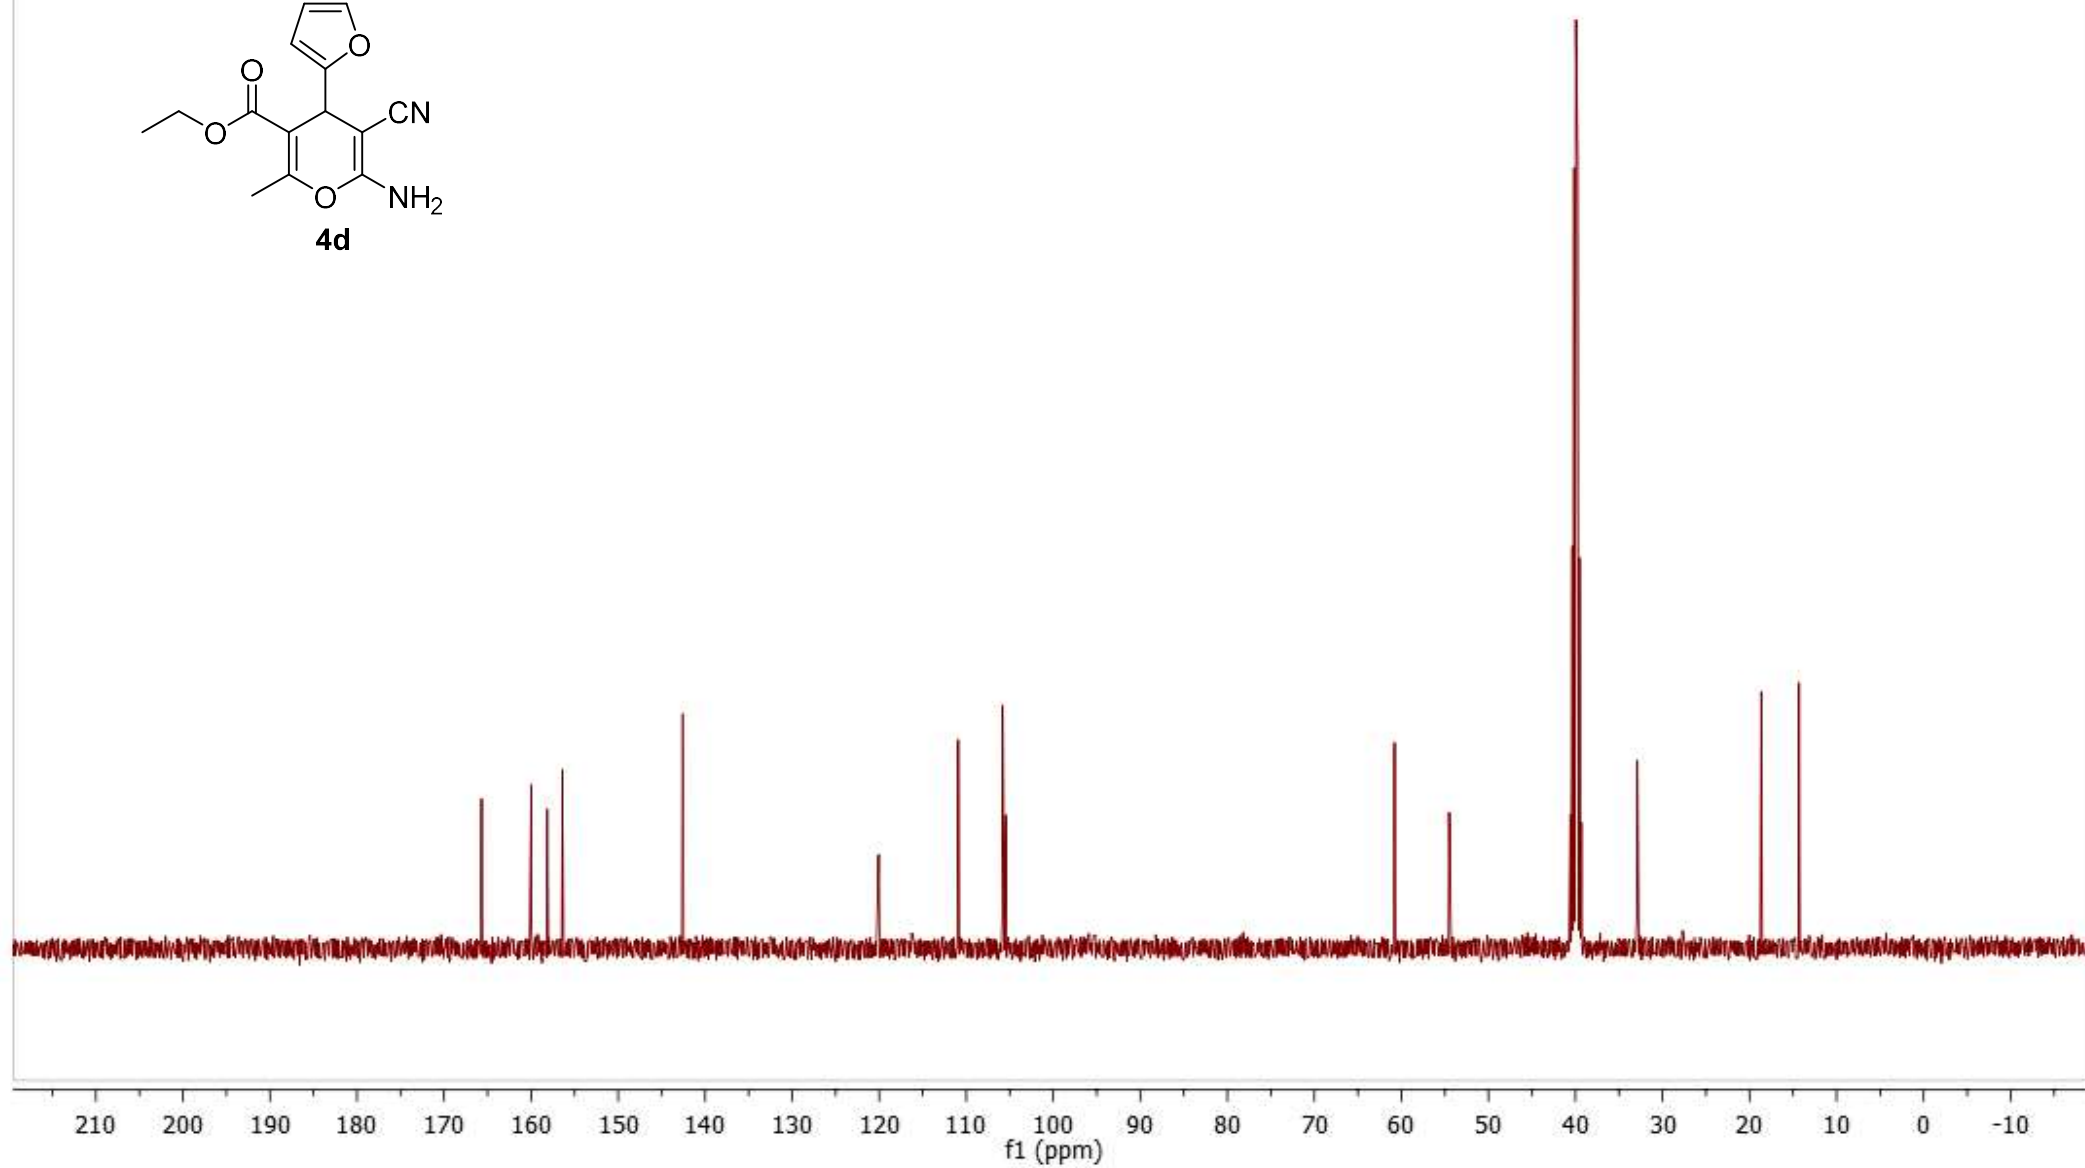

$^{13}\text{C}$  NMR (DMSO- $d_6$ ) **4d**

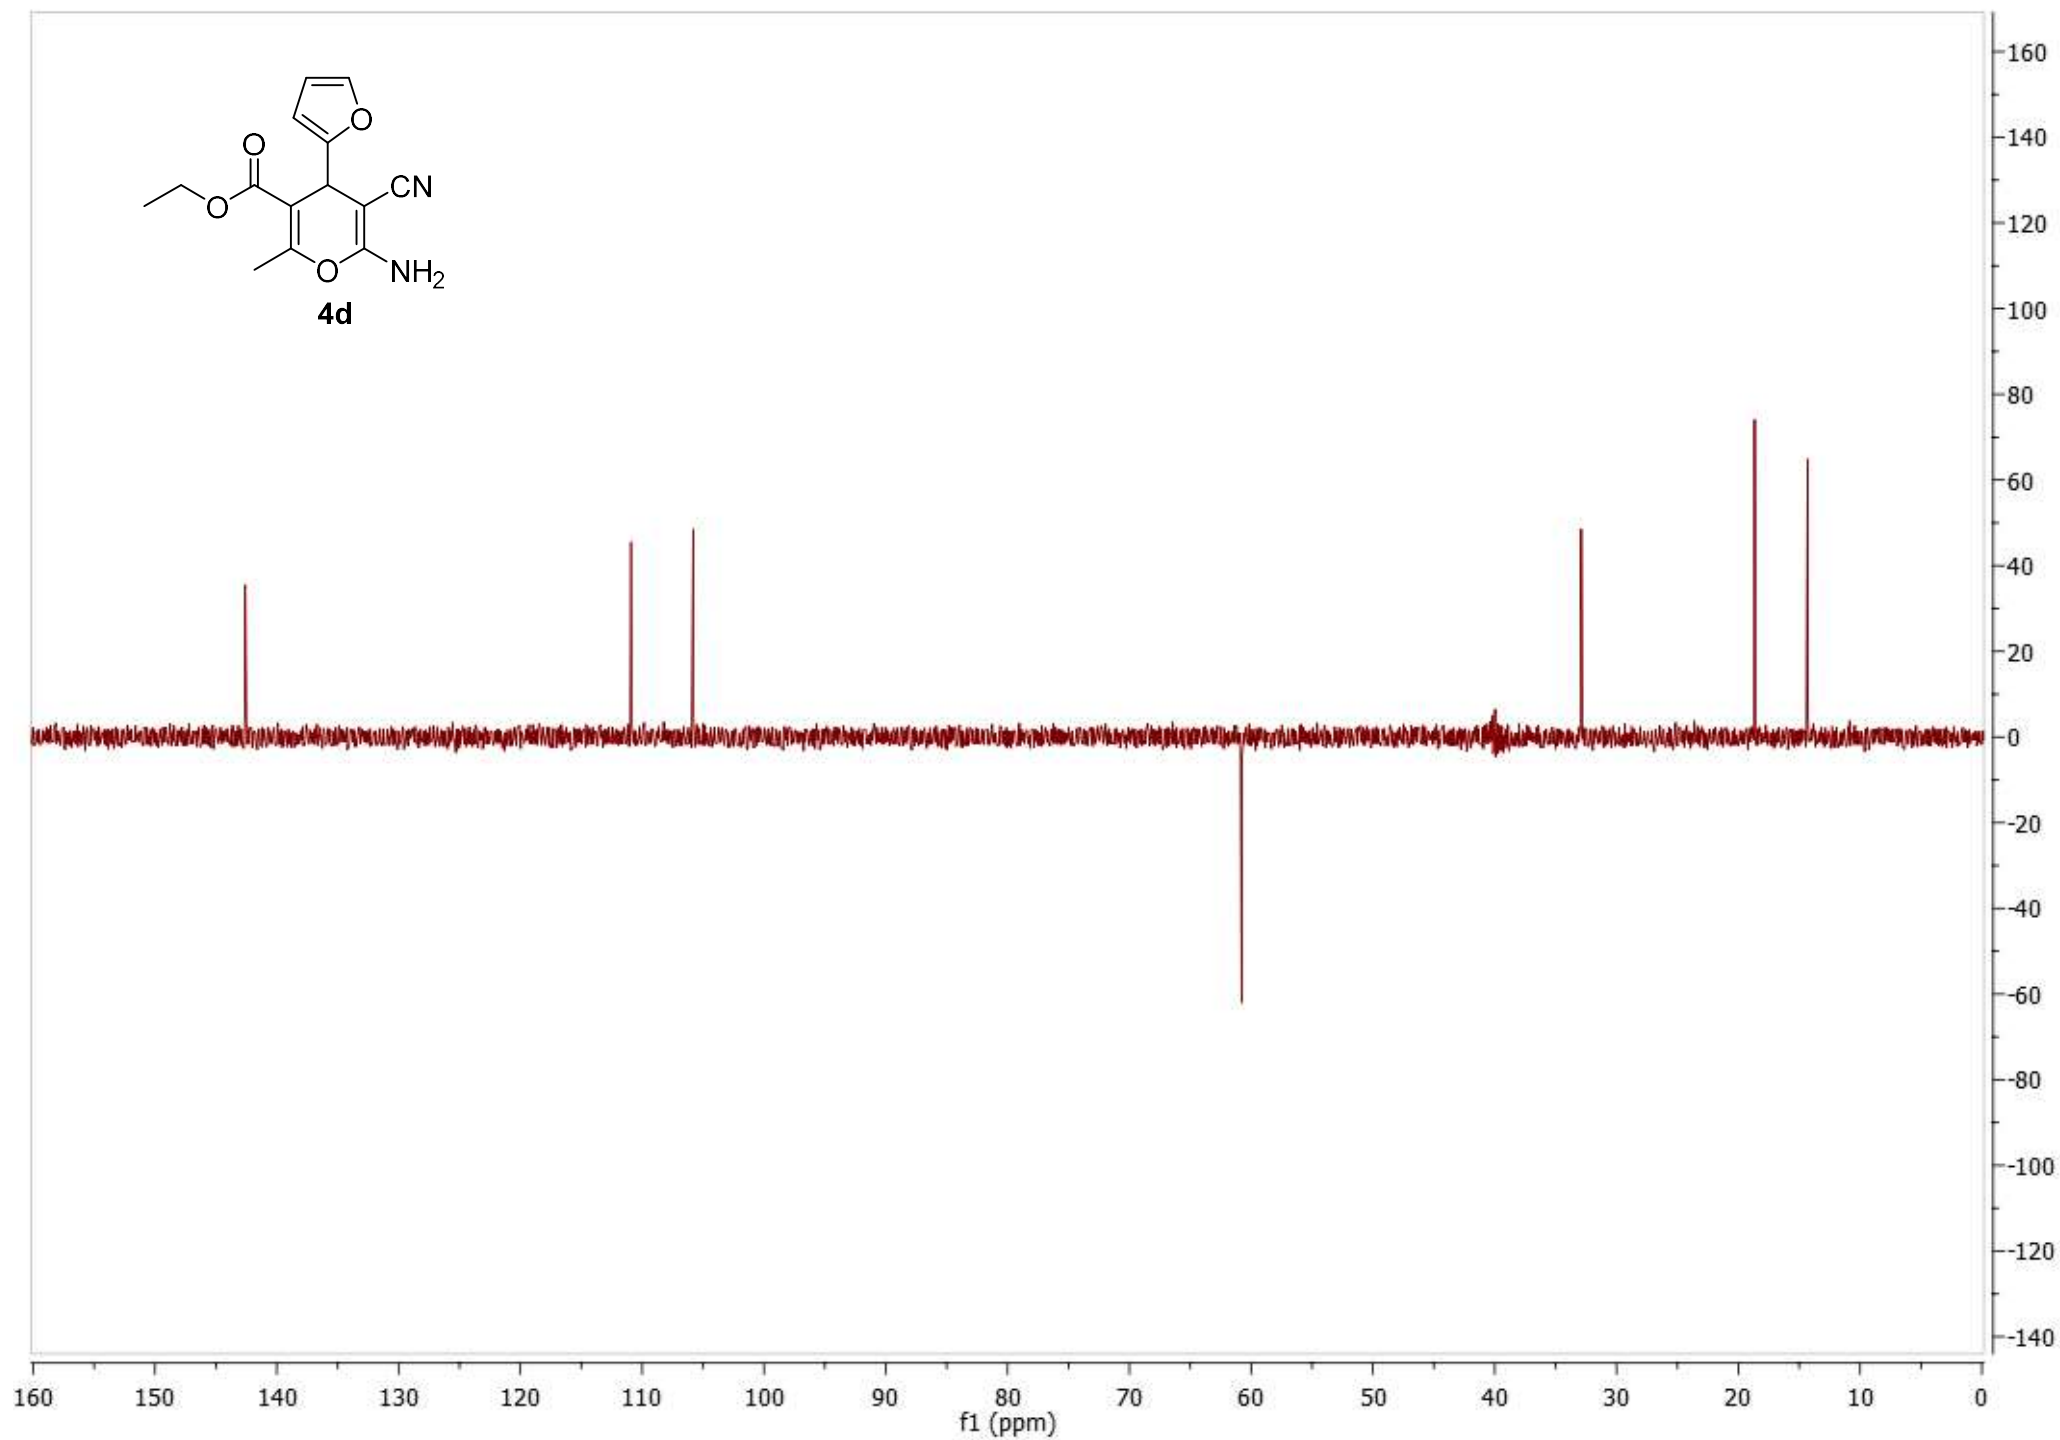 $^{13}\text{C}$  NMR APT (DMSO- $d_6$ ) **4d**

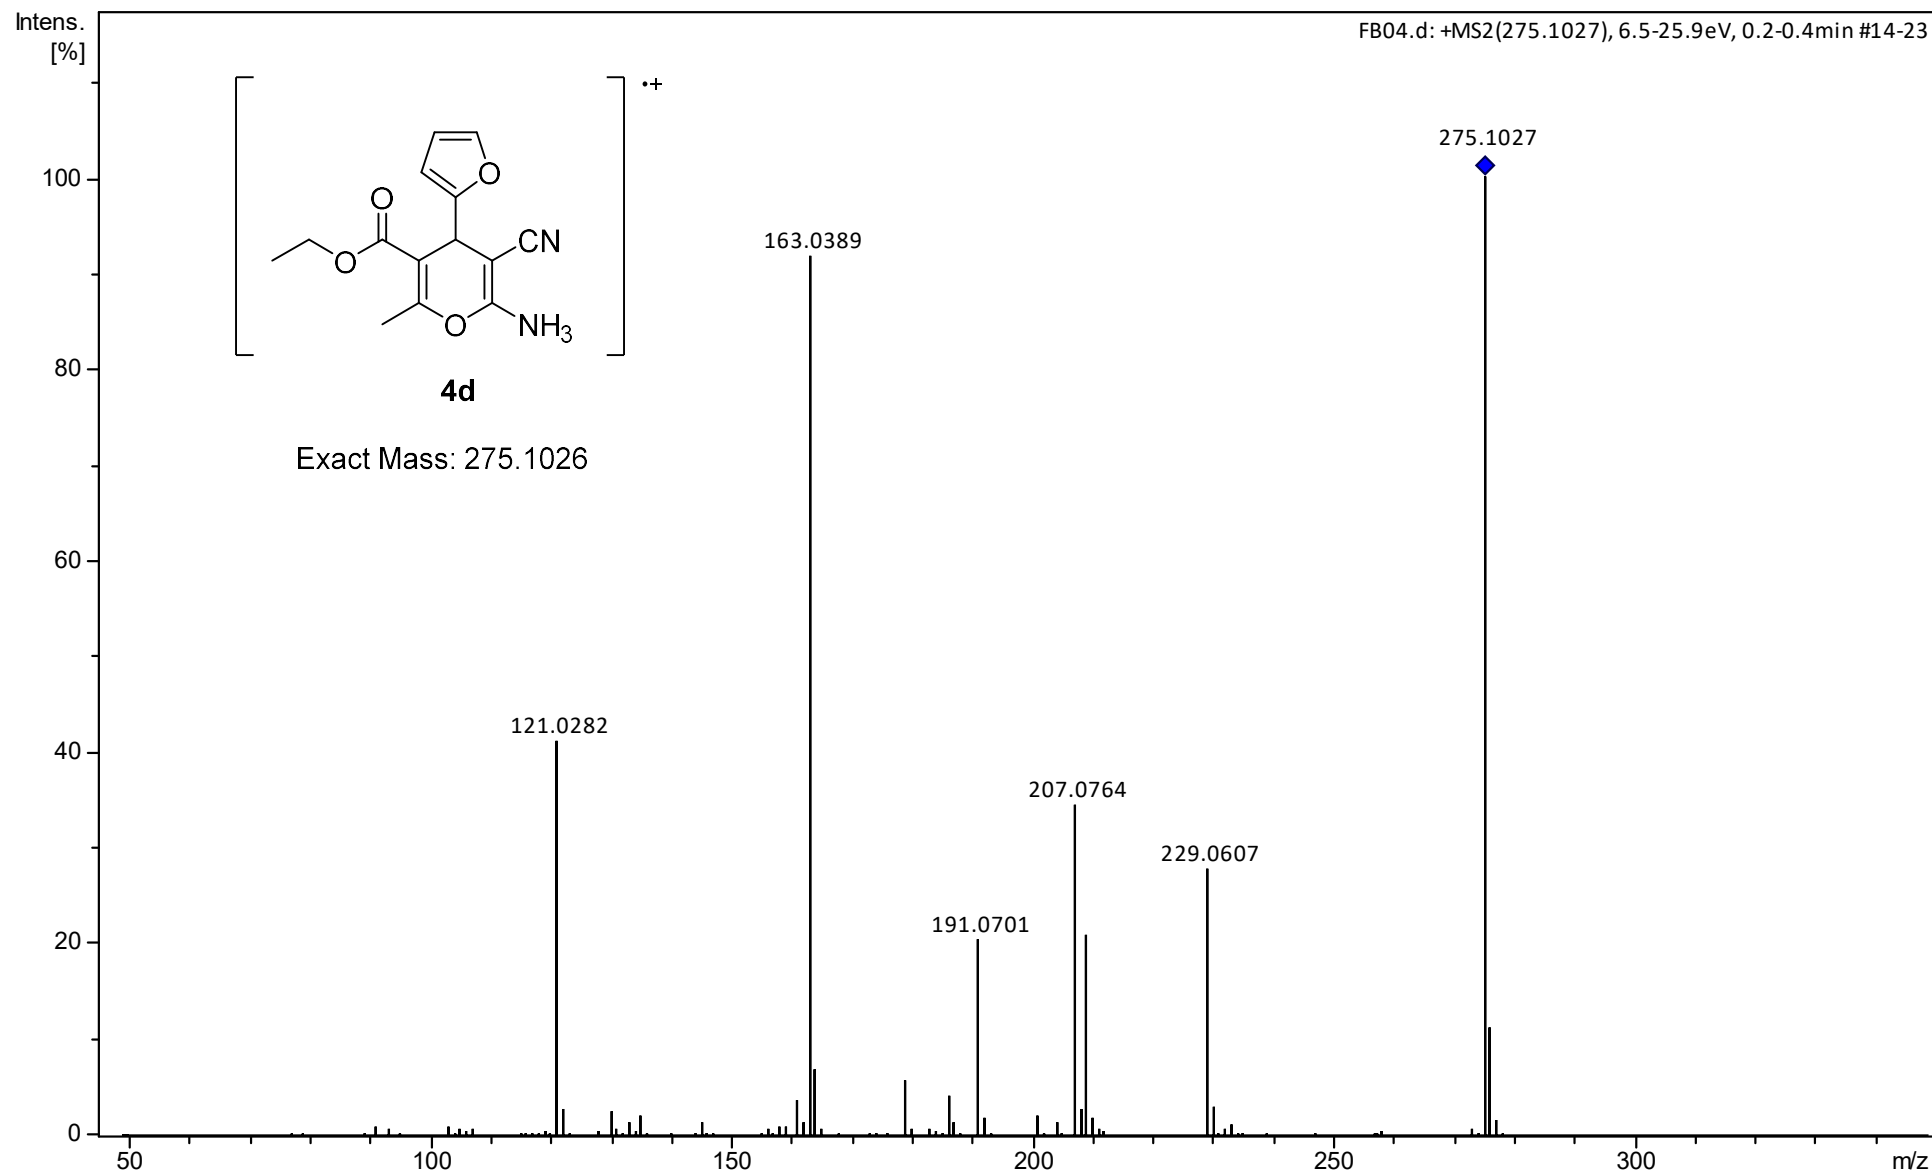HRMS **4d**



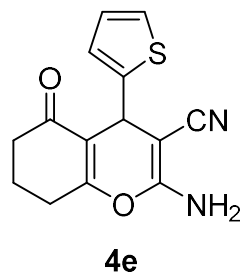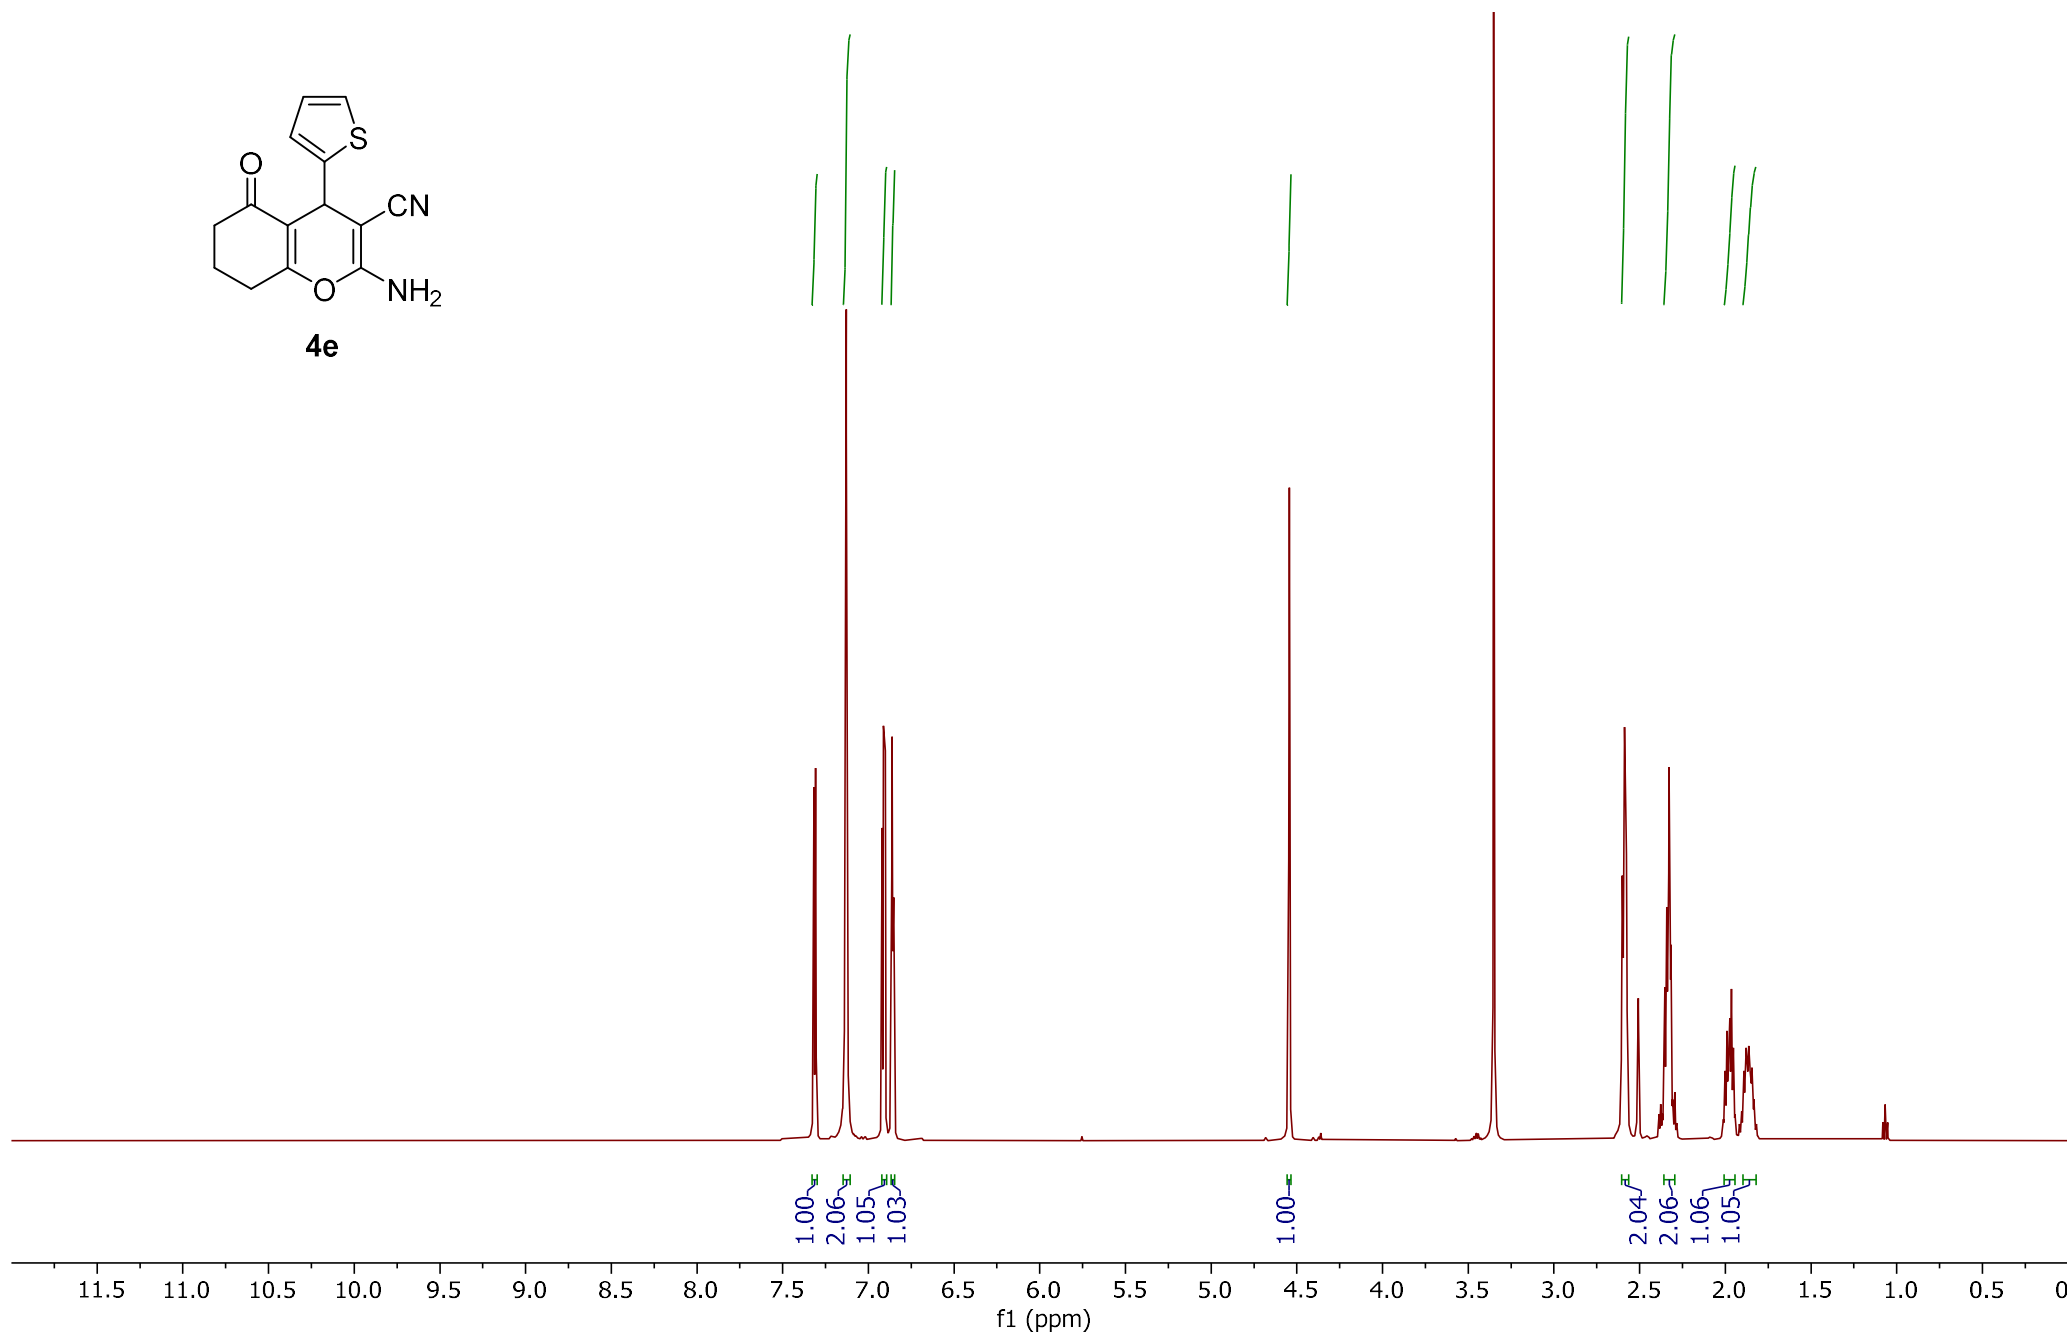

$^1\text{H}$  NMR ( $\text{DMSO}-d_6$ ) **4e**

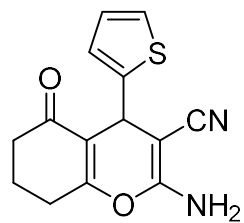**4e**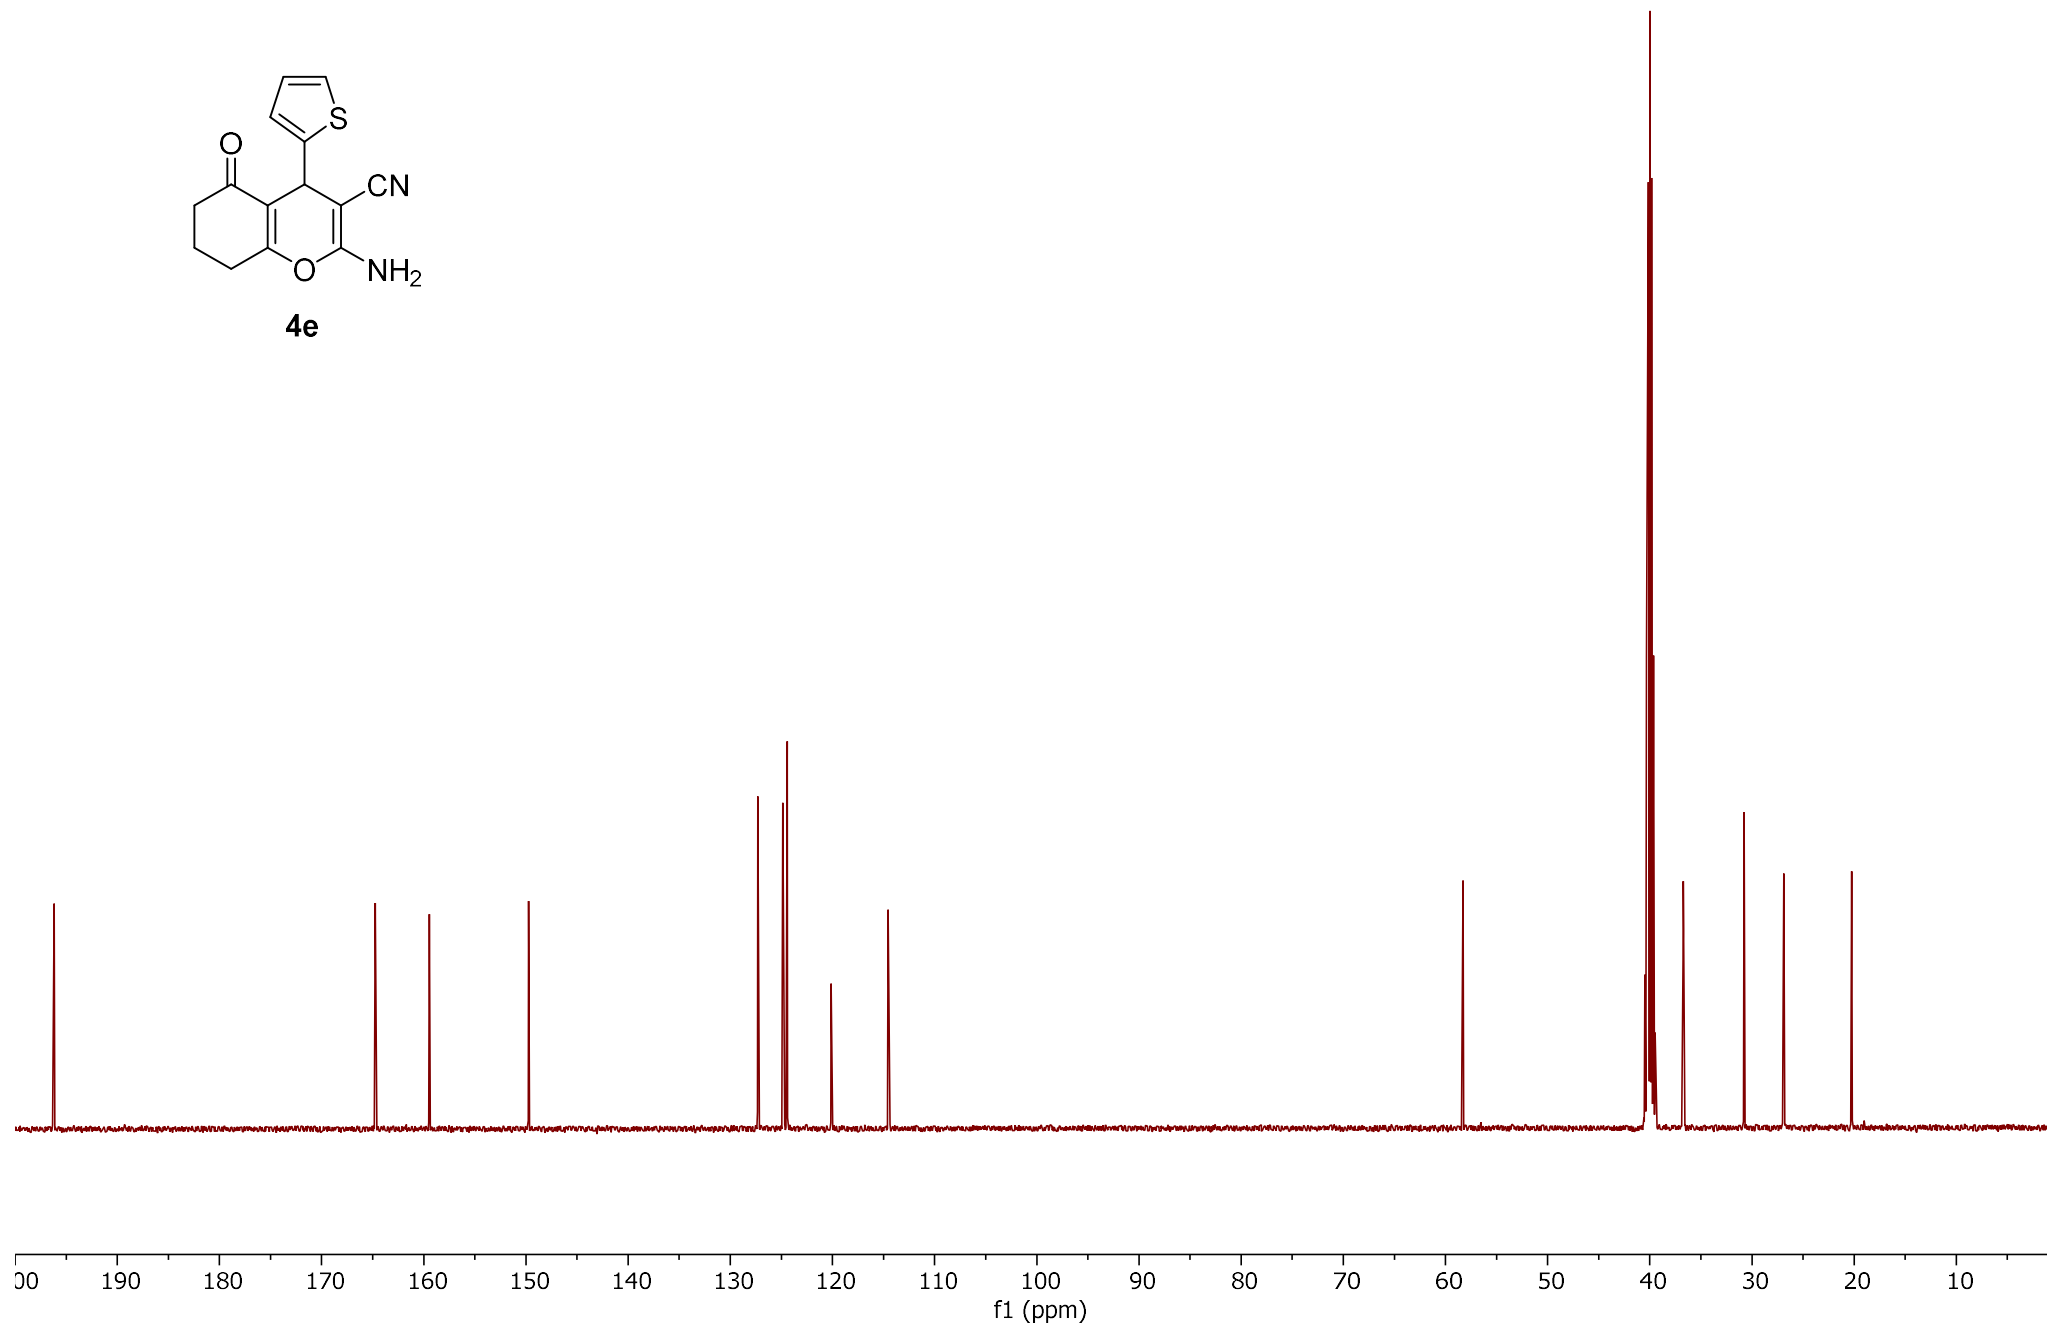<sup>13</sup>C NMR (DMSO-*d*<sub>6</sub>) **4e**

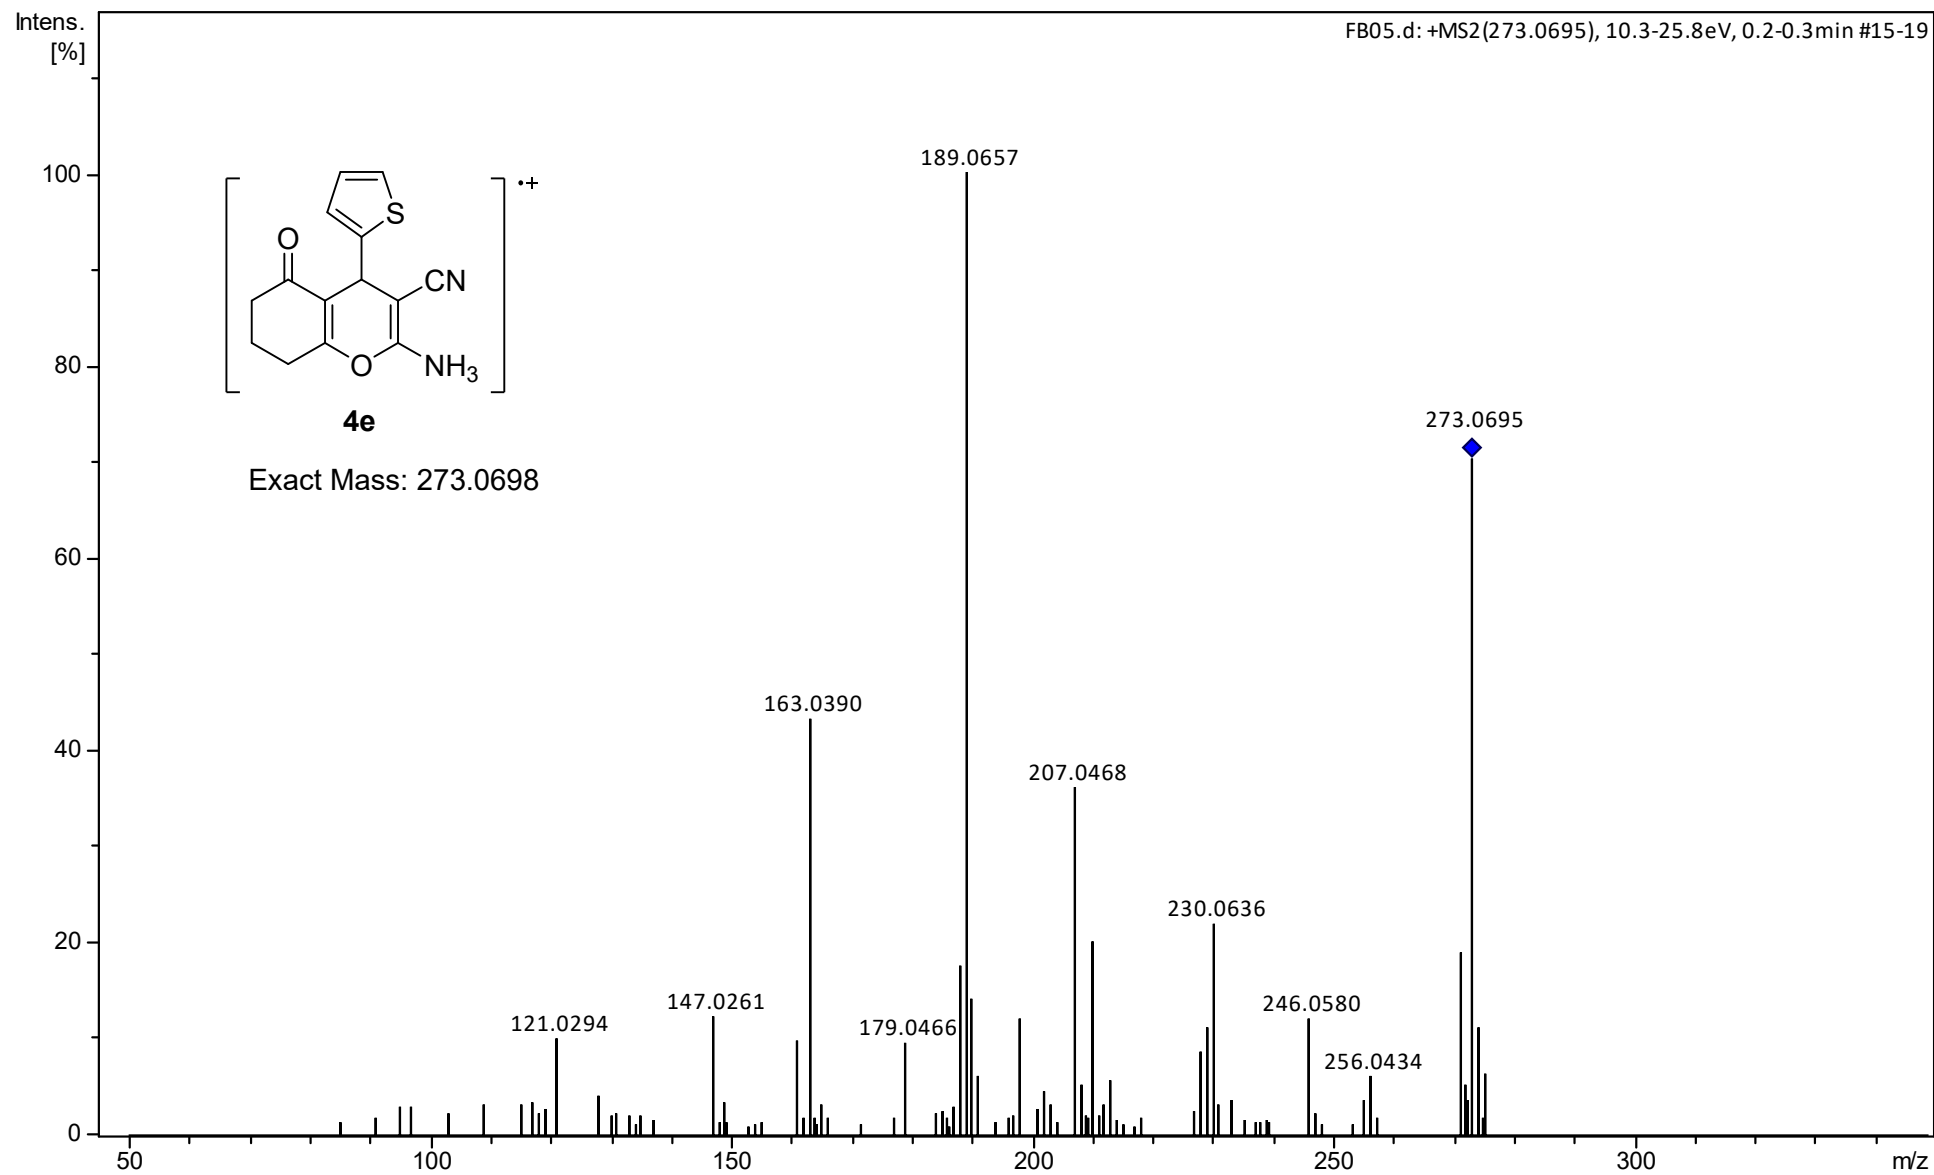HRMS **4e**

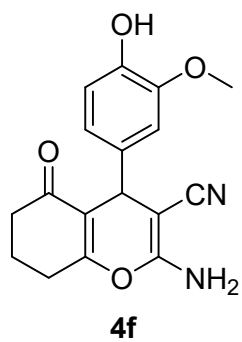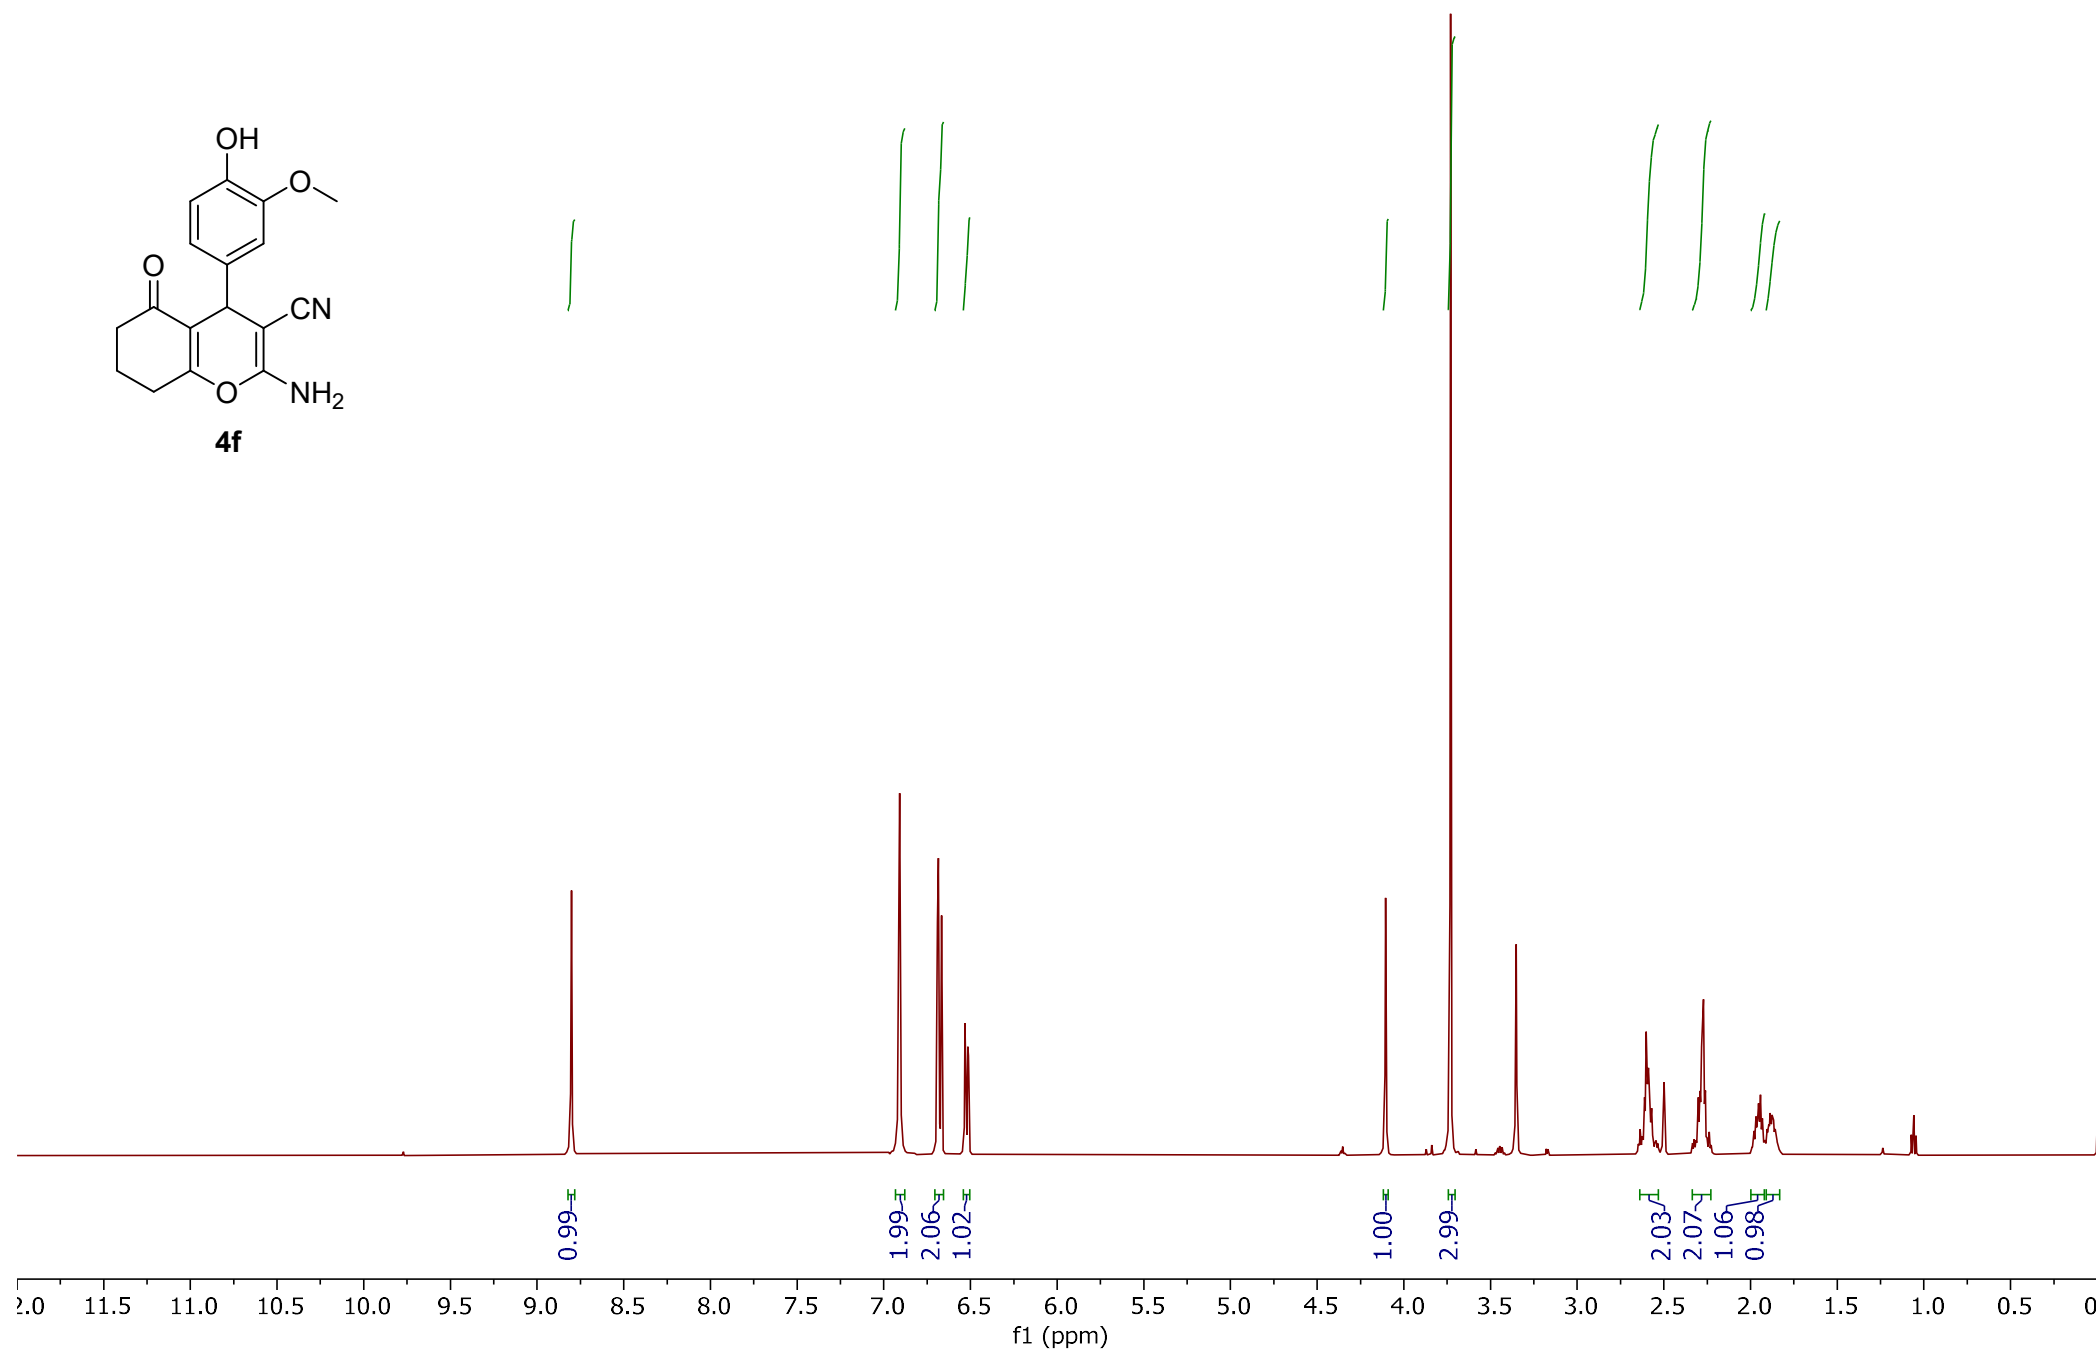

<sup>1</sup>H NMR (DMSO-*d*<sub>6</sub>) **4f**

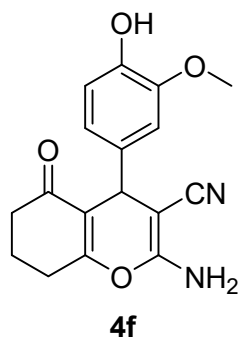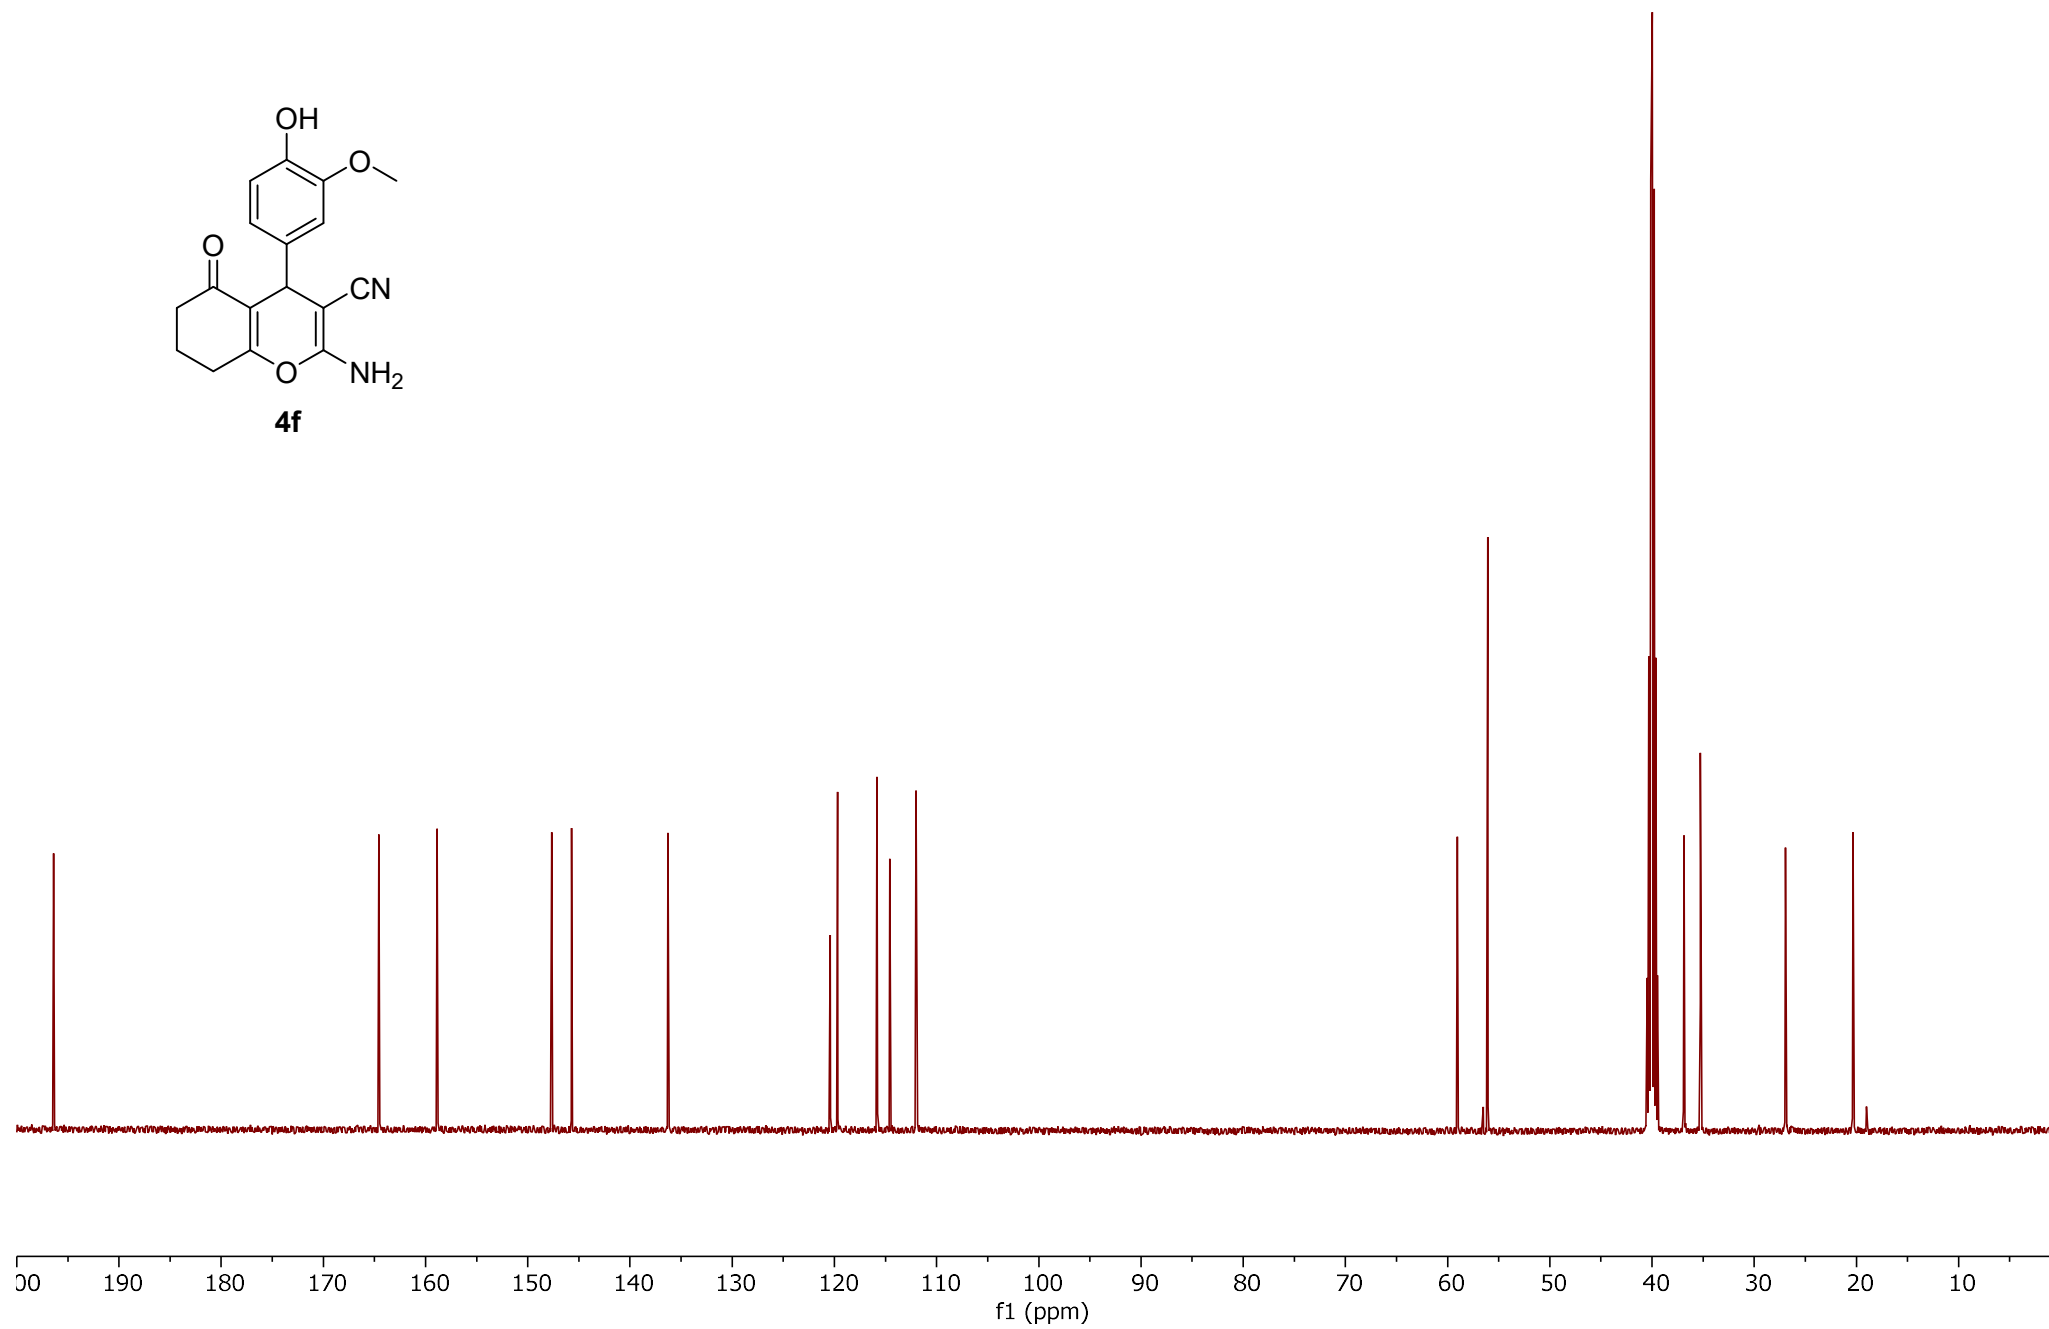

<sup>13</sup>C NMR (DMSO-*d*<sub>6</sub>) **4f**

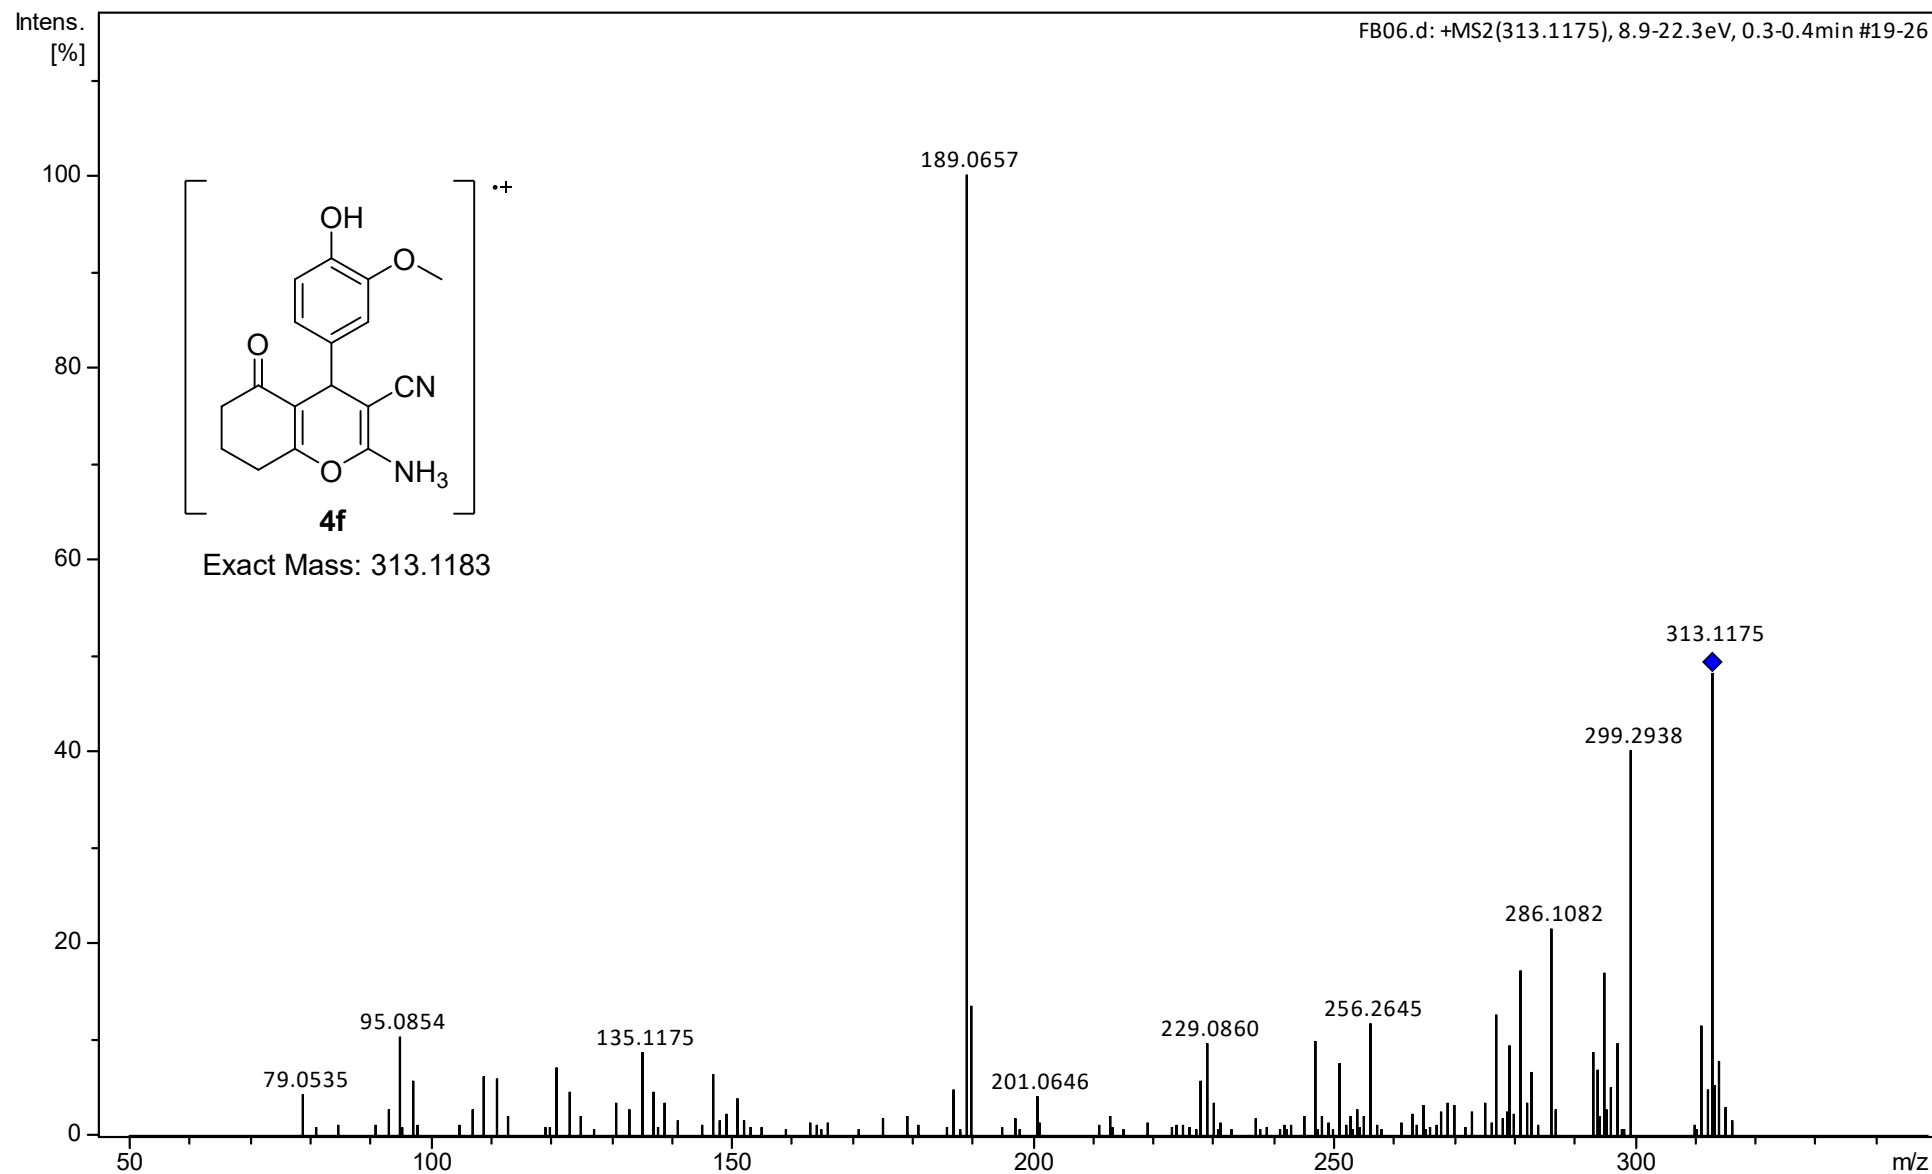HRMS **4f**

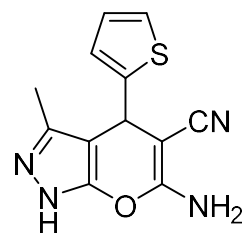**6a**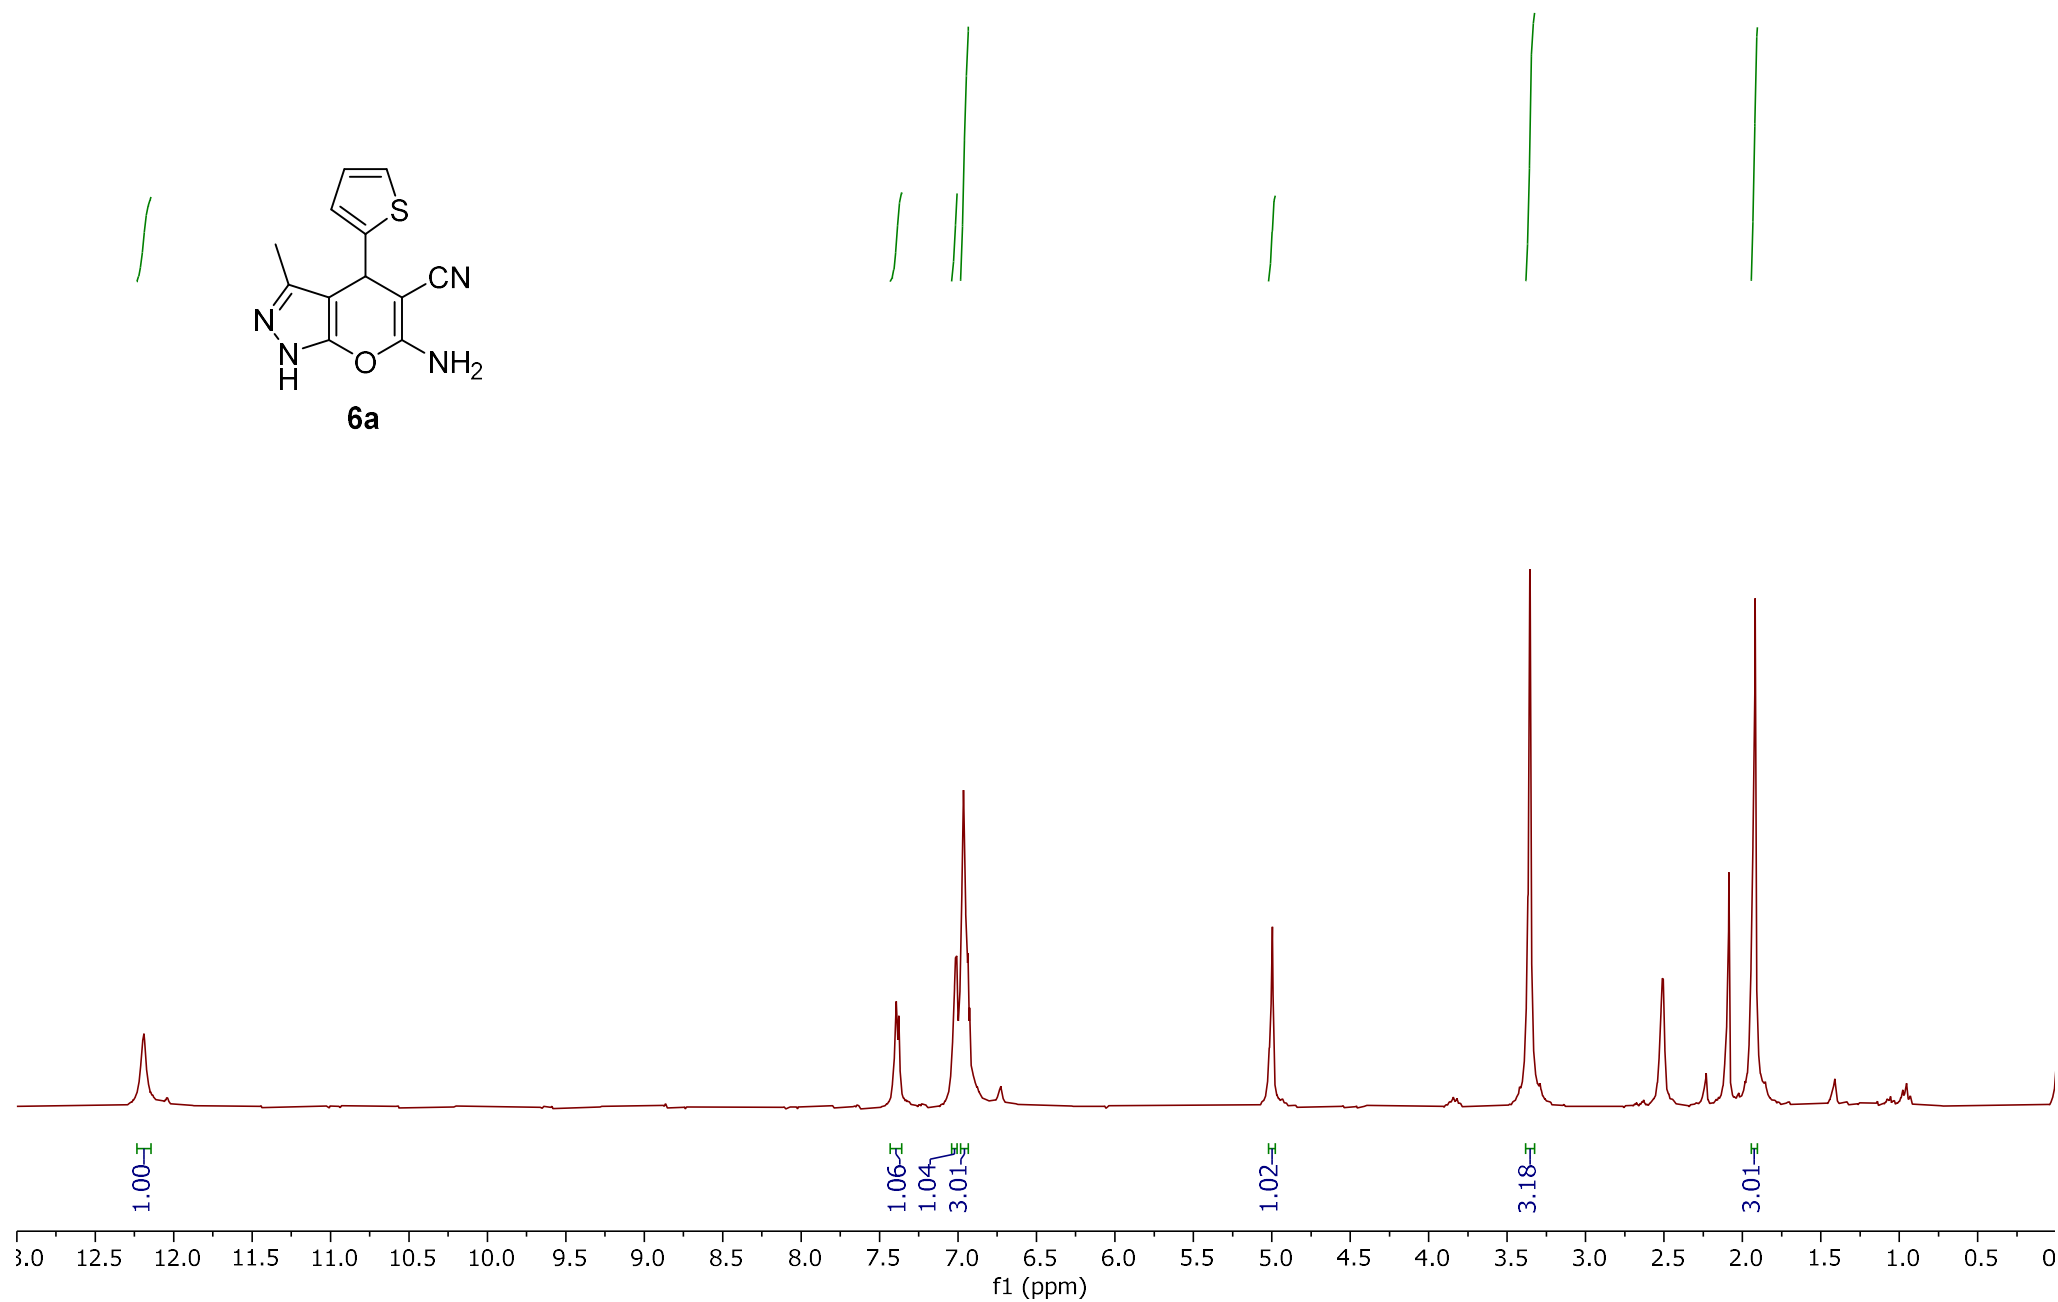**<sup>1</sup>H NMR (DMSO-*d*<sub>6</sub>) 6a**

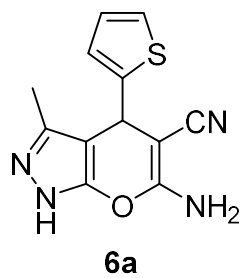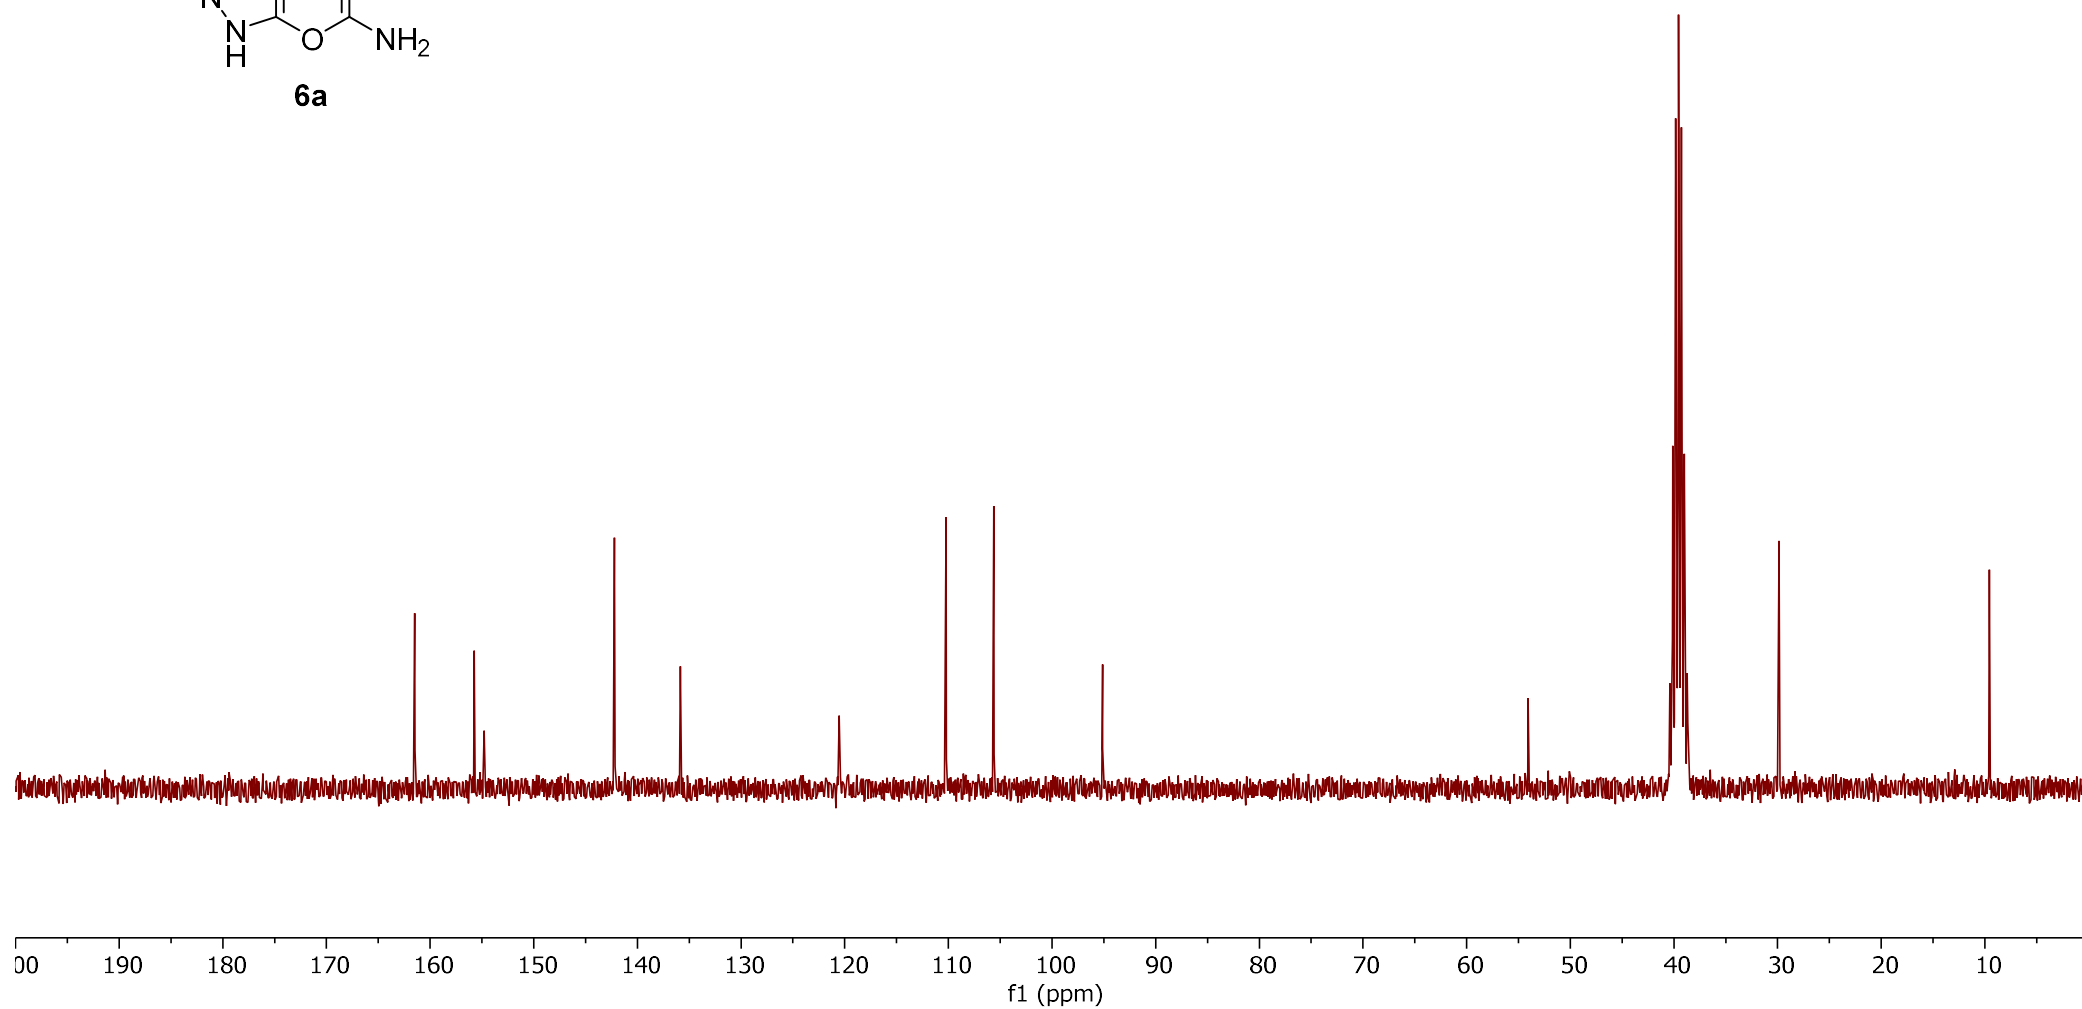

<sup>13</sup>C NMR (DMSO-*d*<sub>6</sub>) **6a**



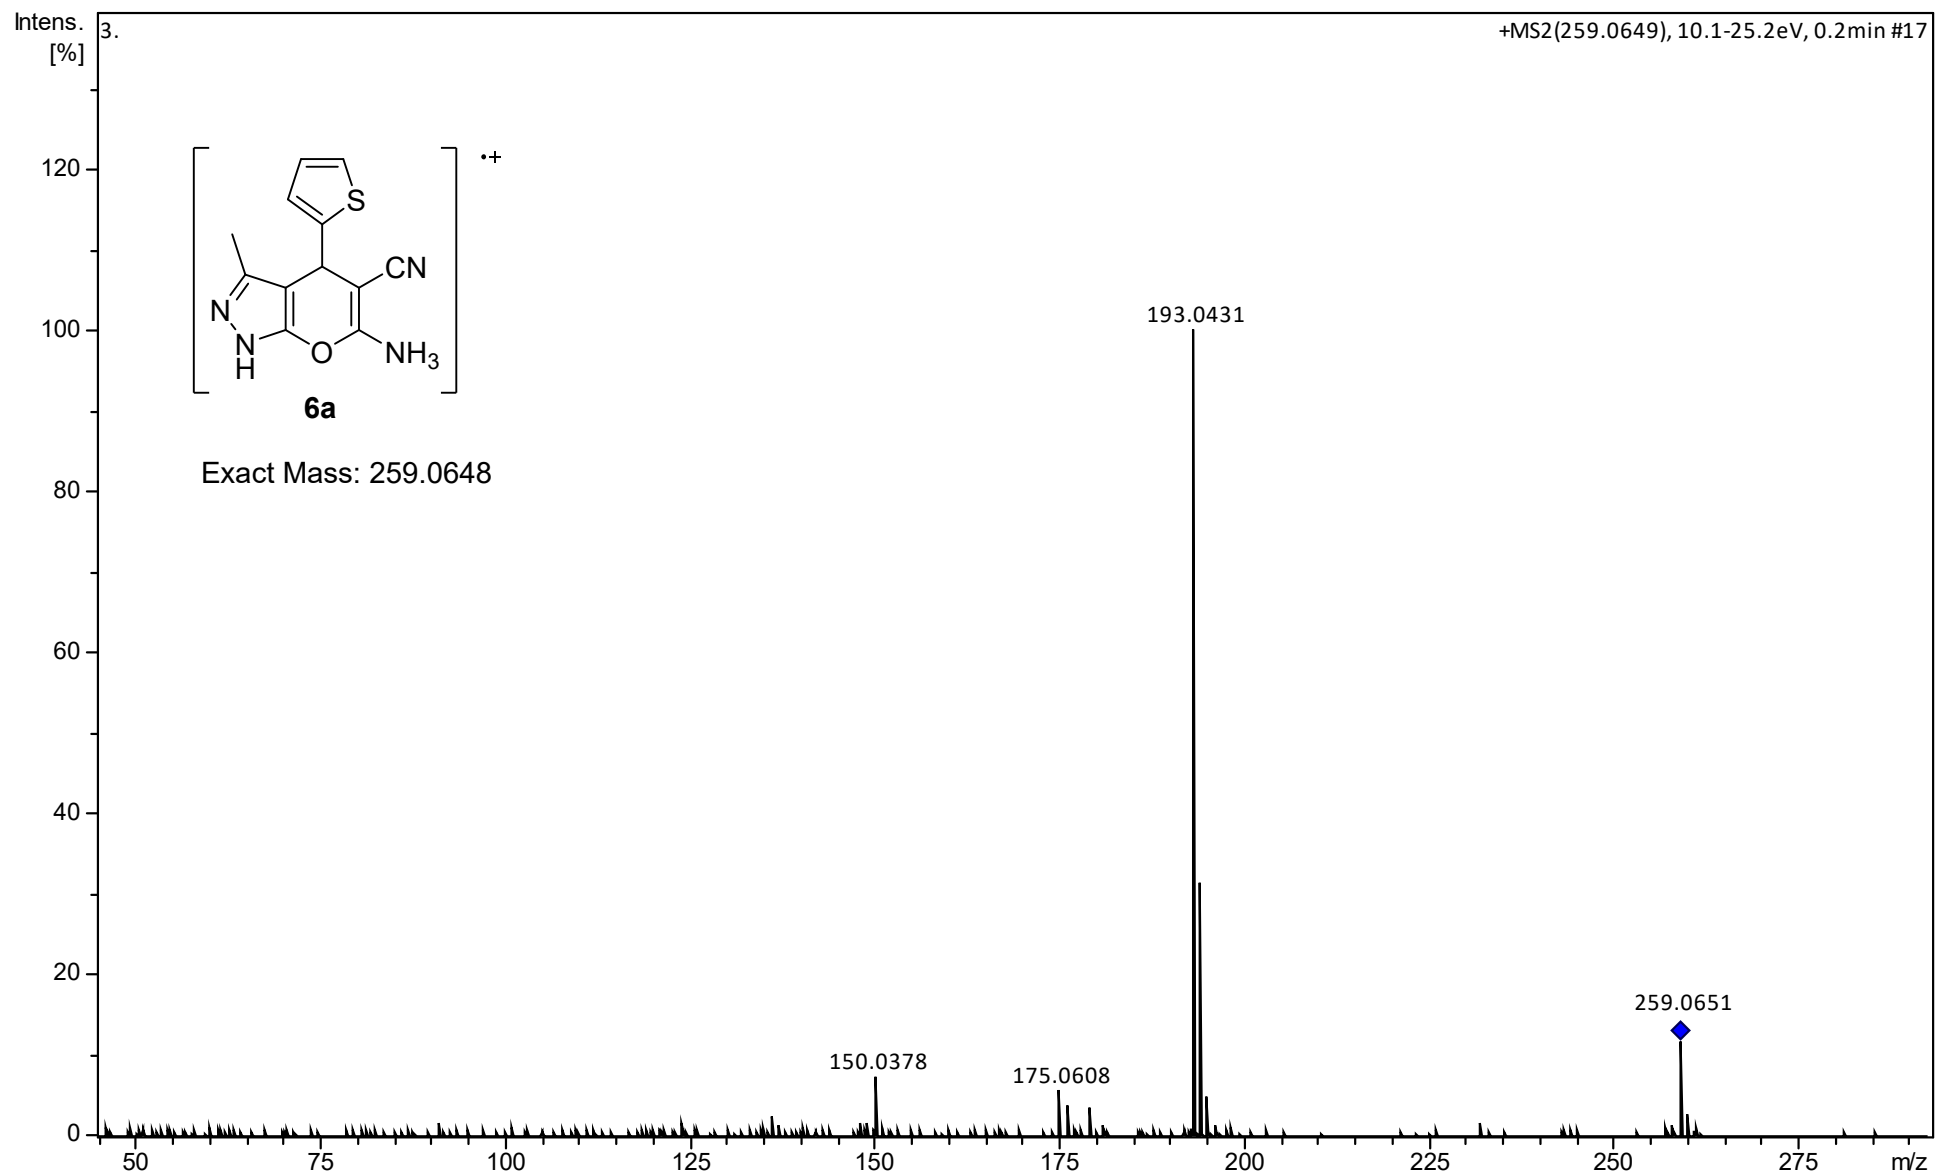HRMS **6a**

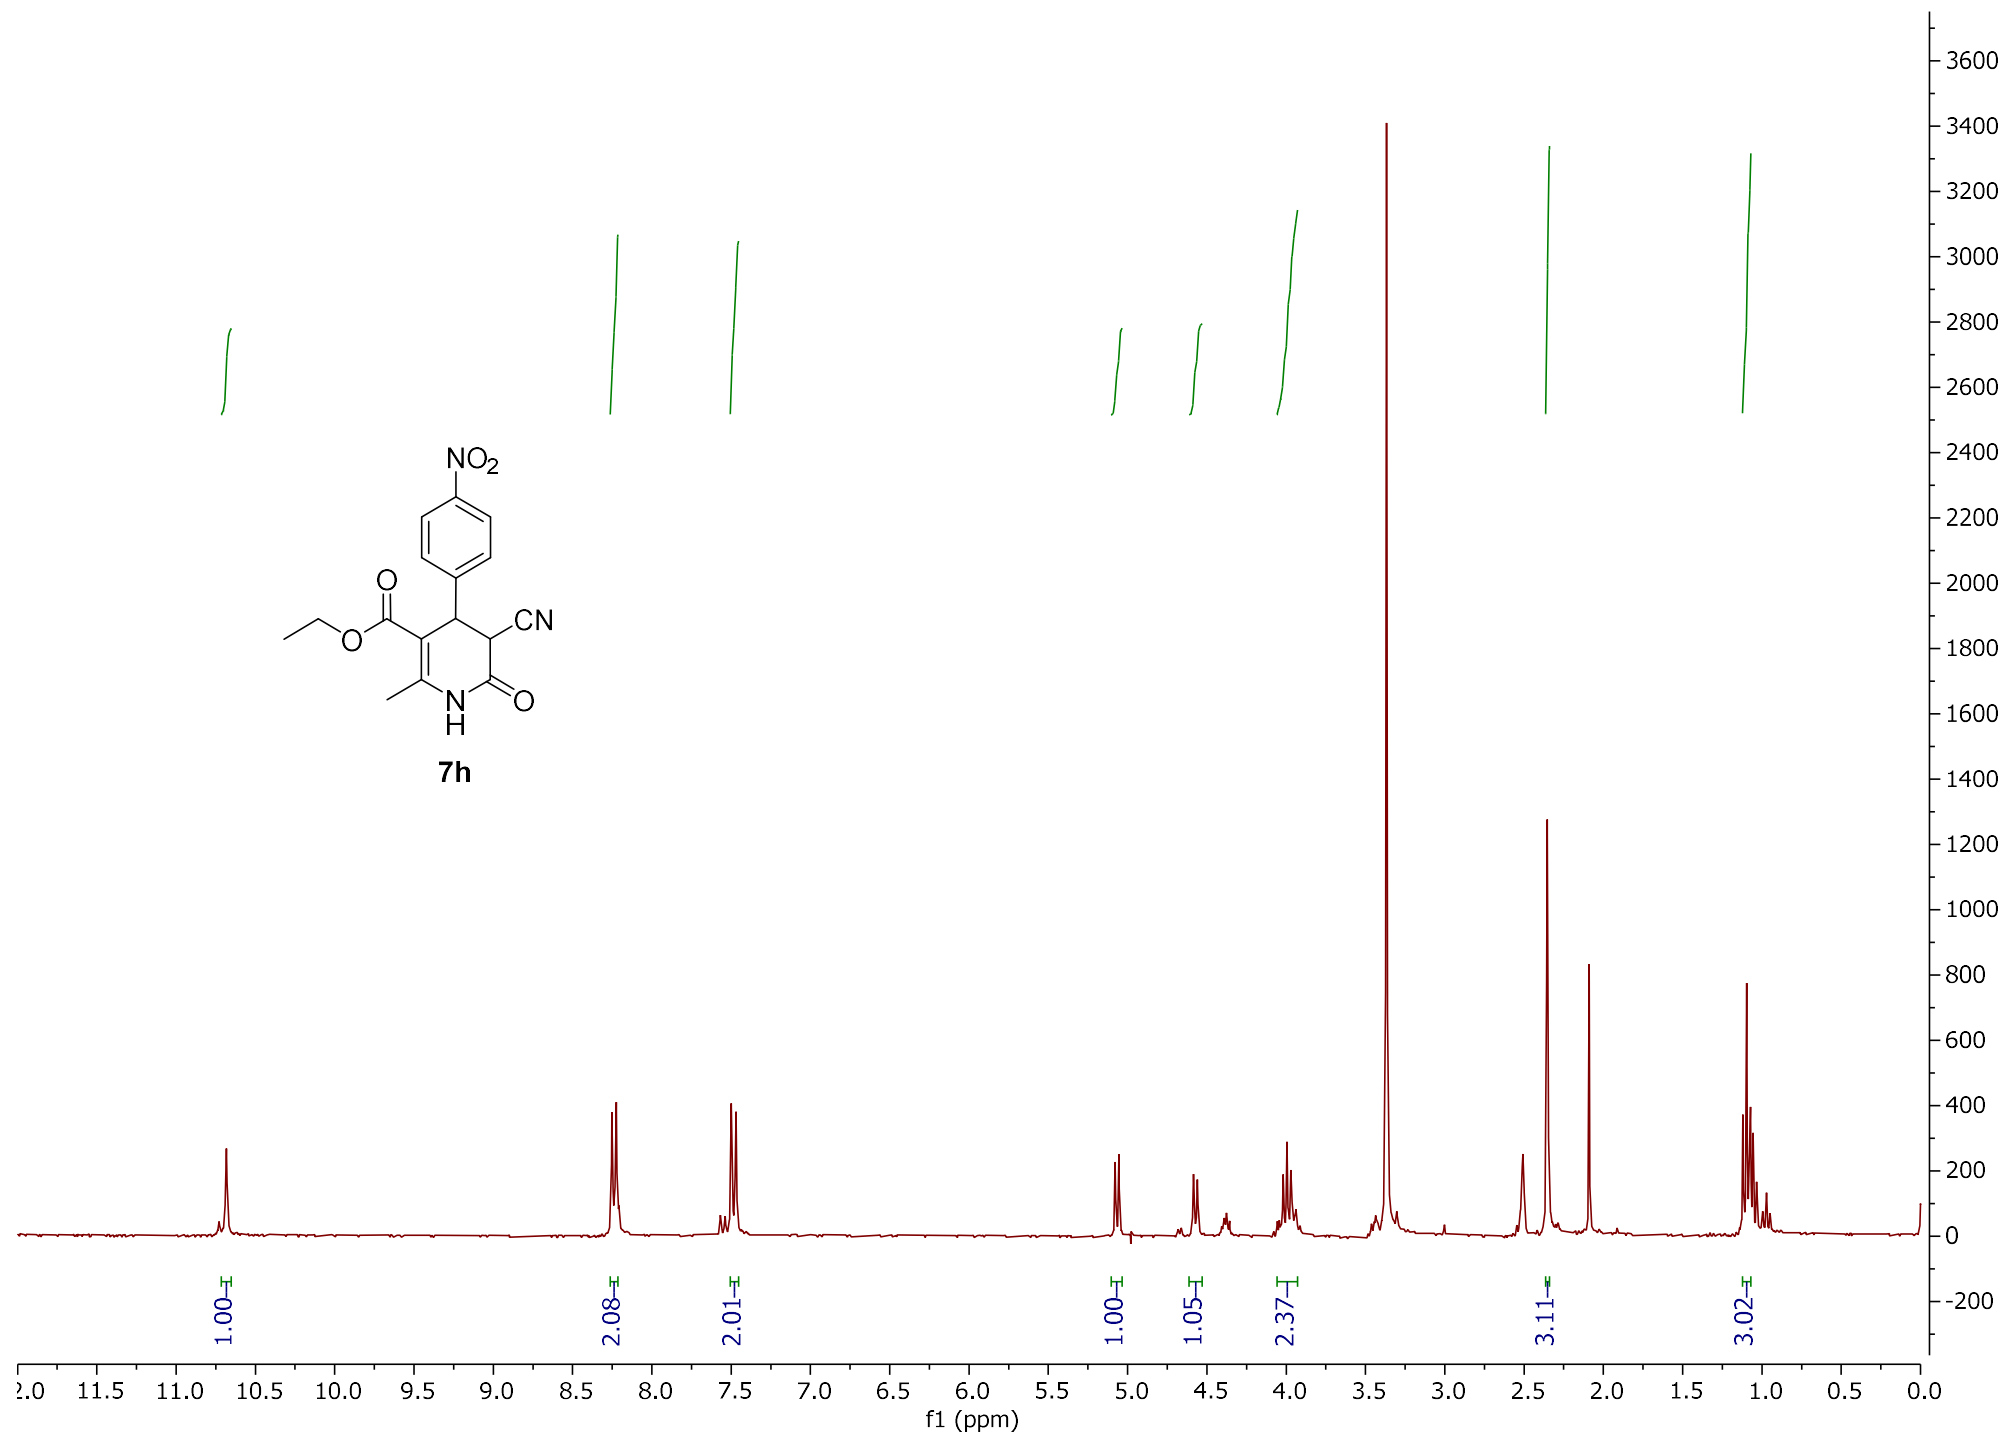 $^1\text{H}$  NMR (DMSO- $d_6$ ) **7h**

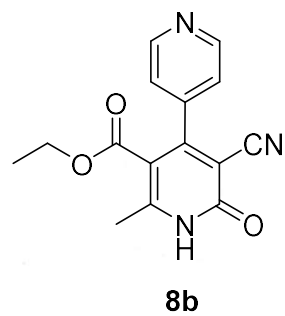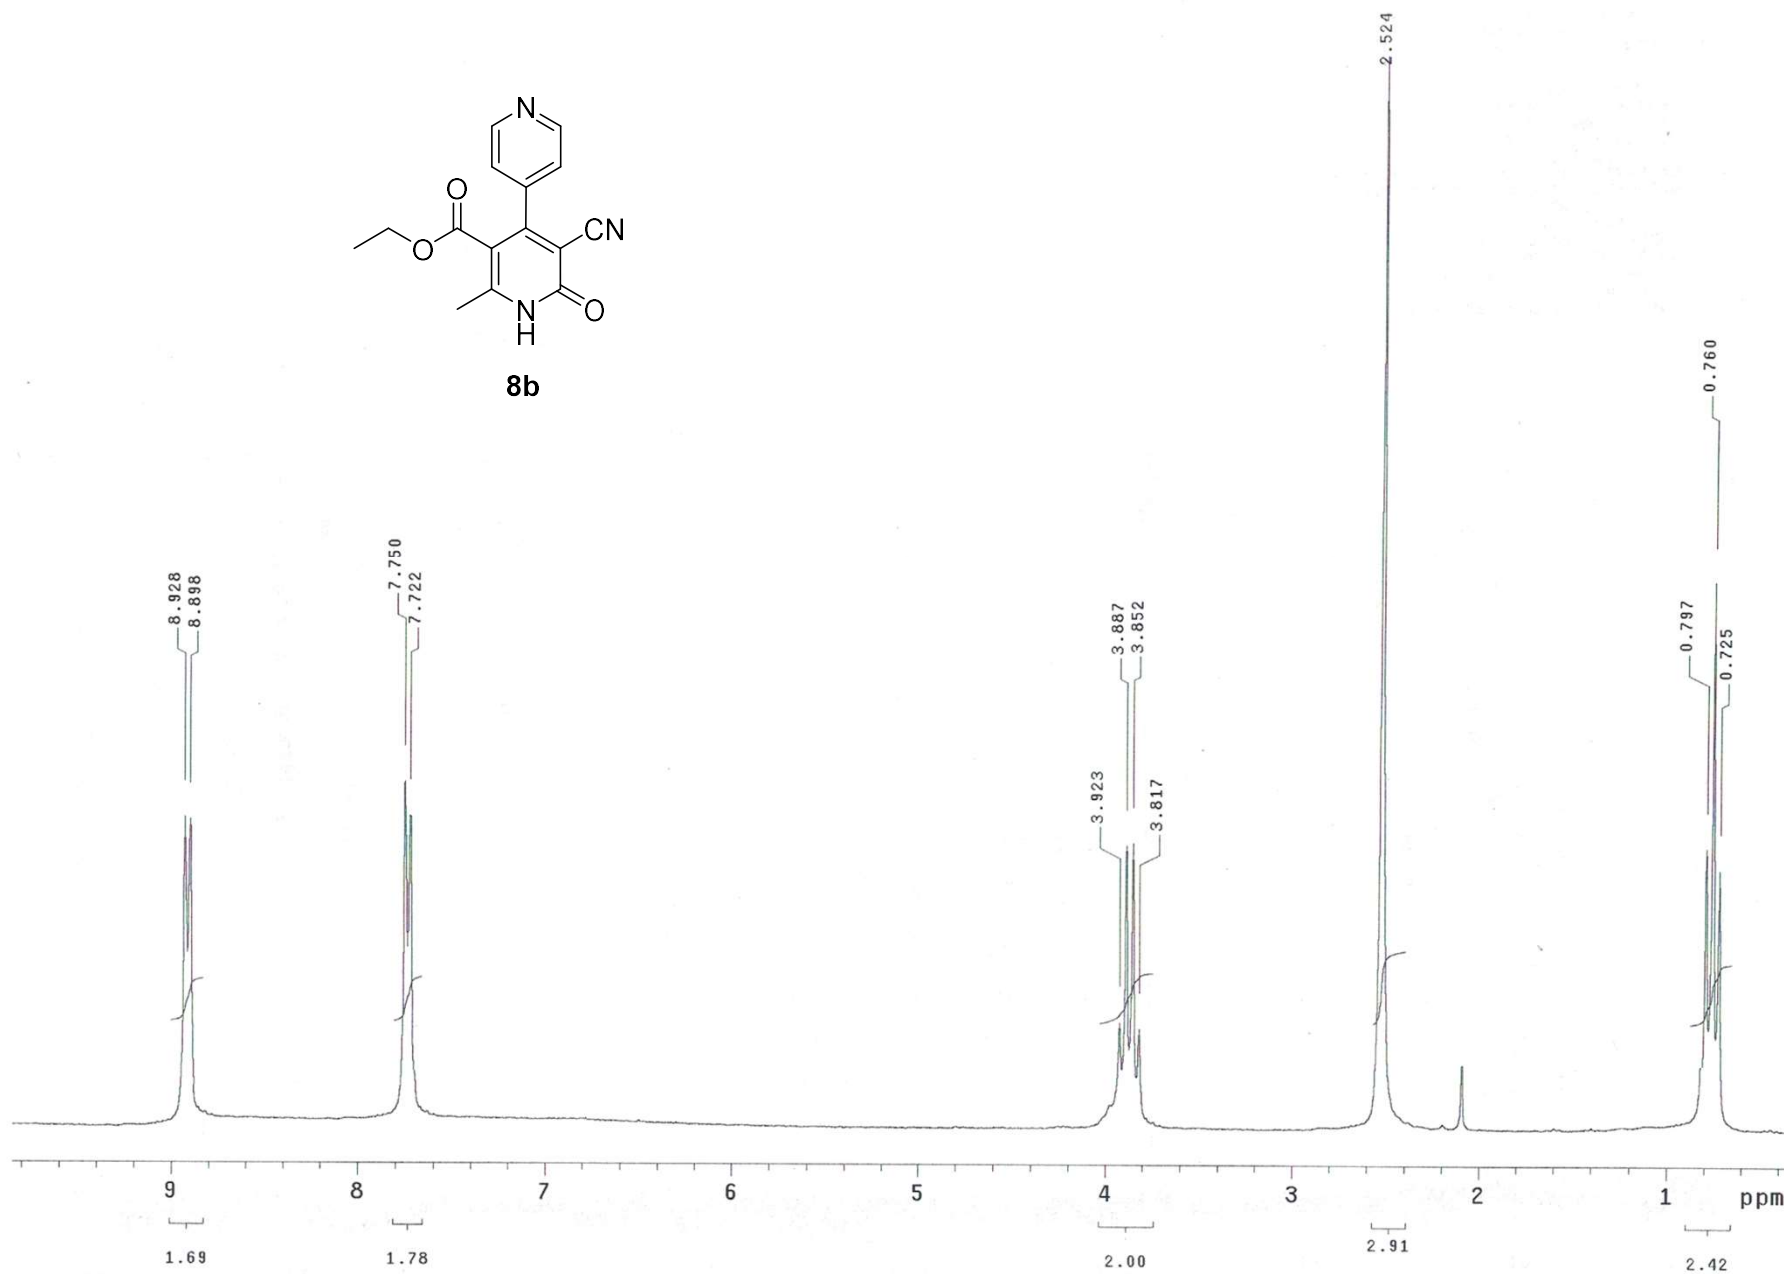

$^1\text{H}$  NMR (DMSO- $d_6$ ) **8b**

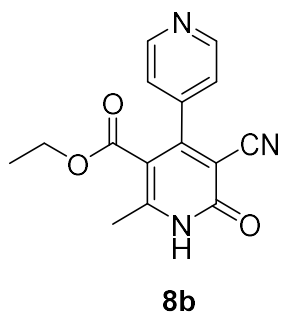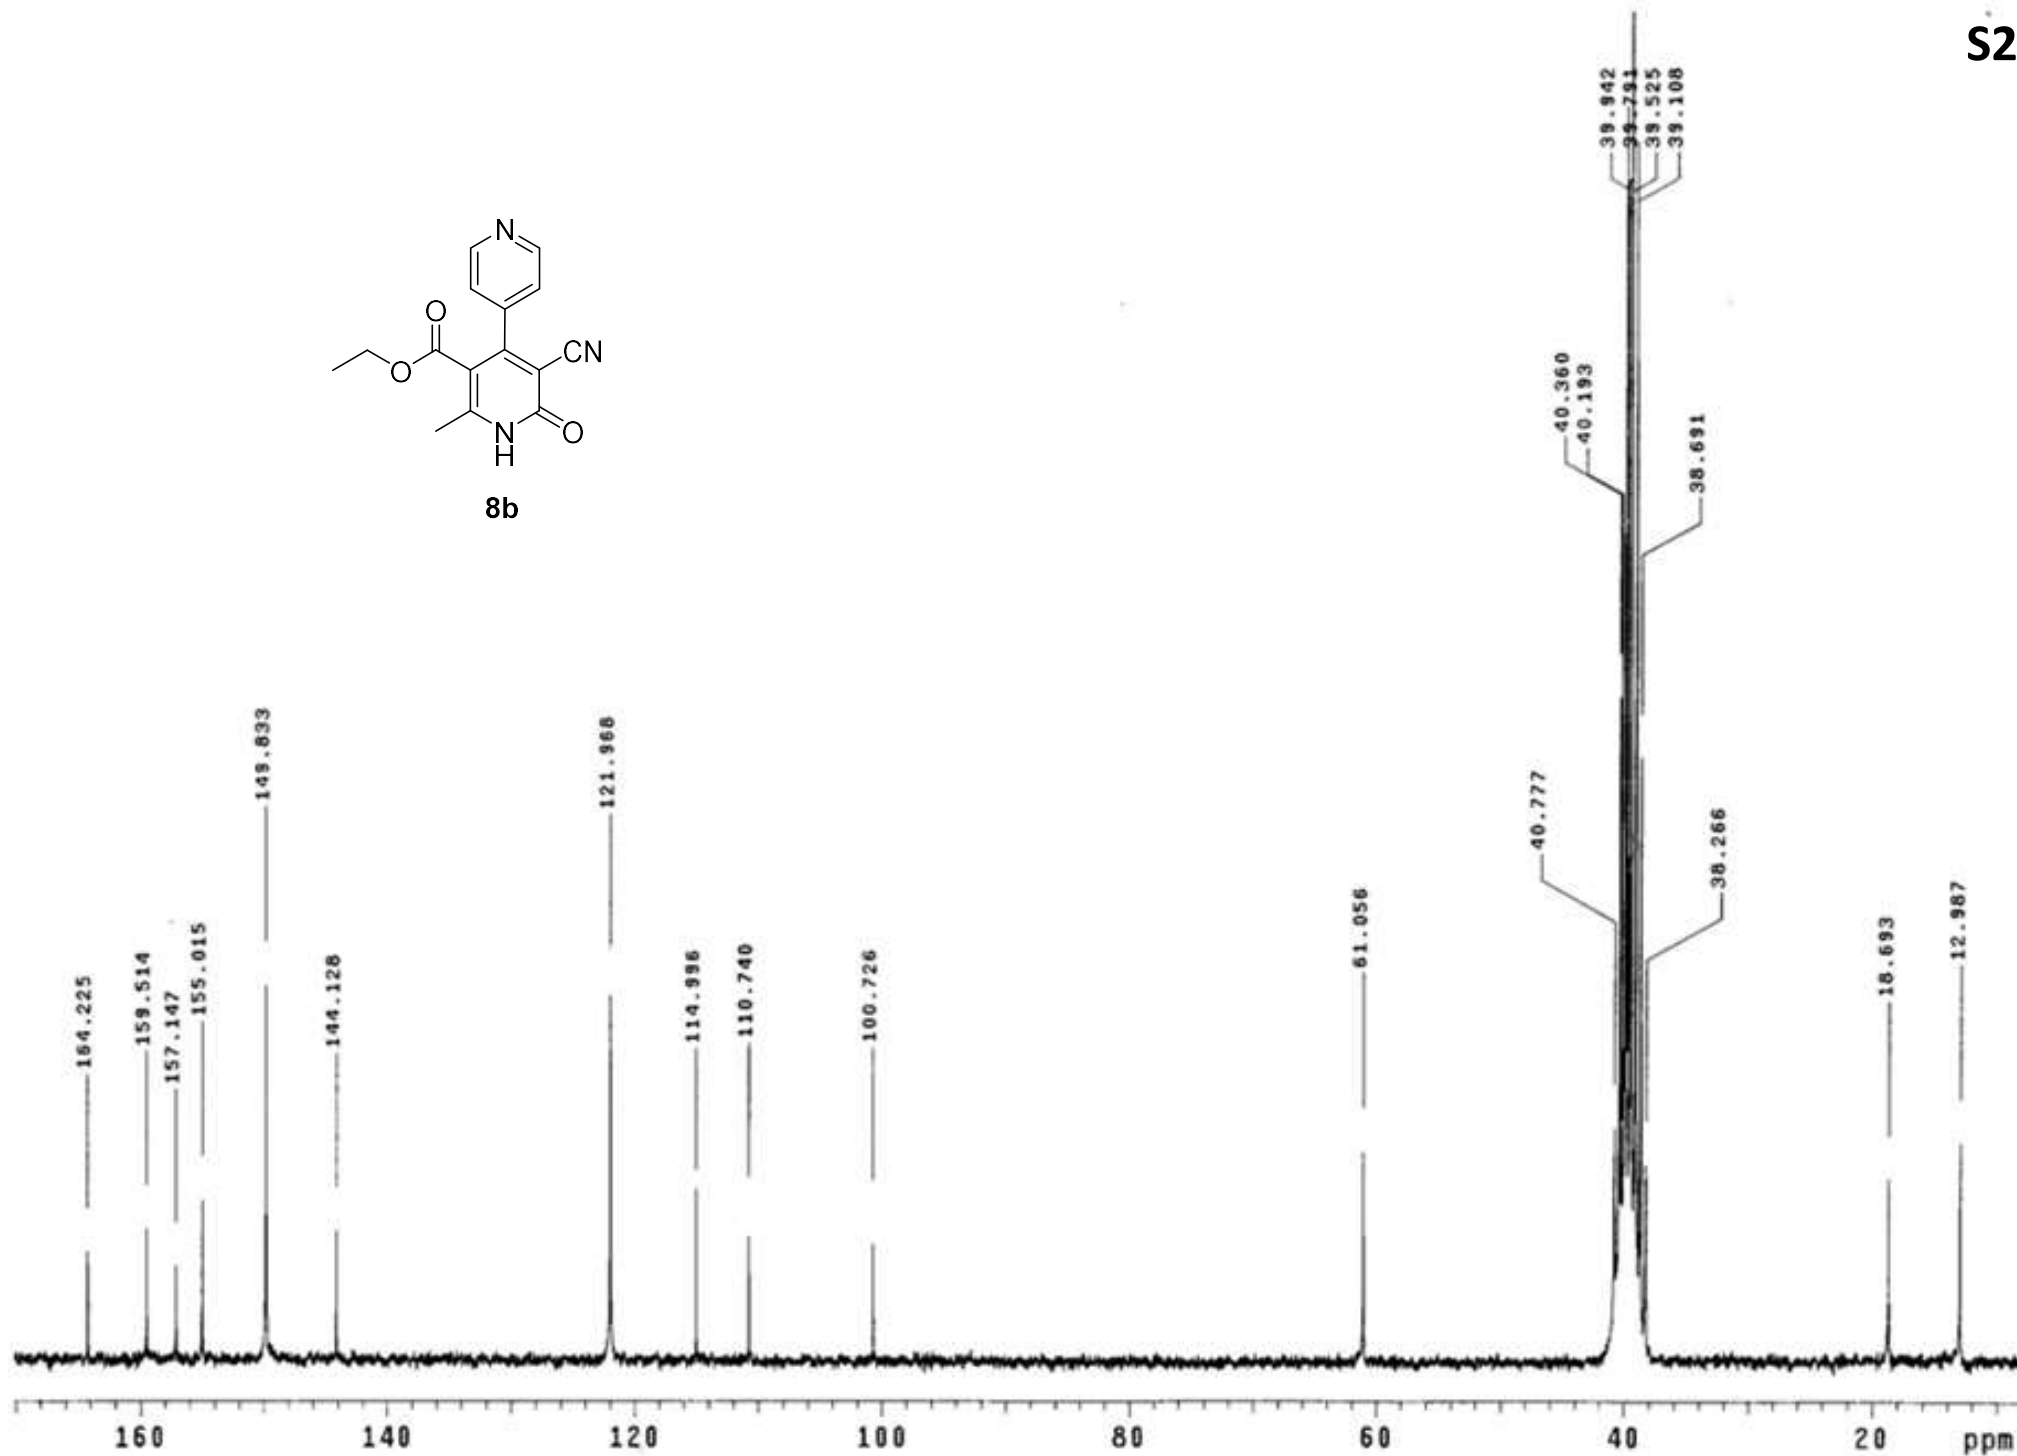

$^{13}\text{C}$  NMR (DMSO- $d_6$ ) **8b**

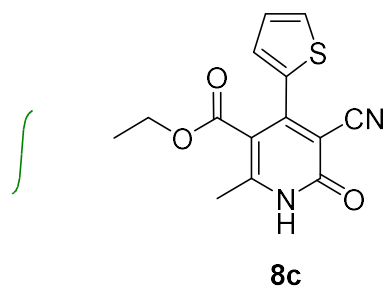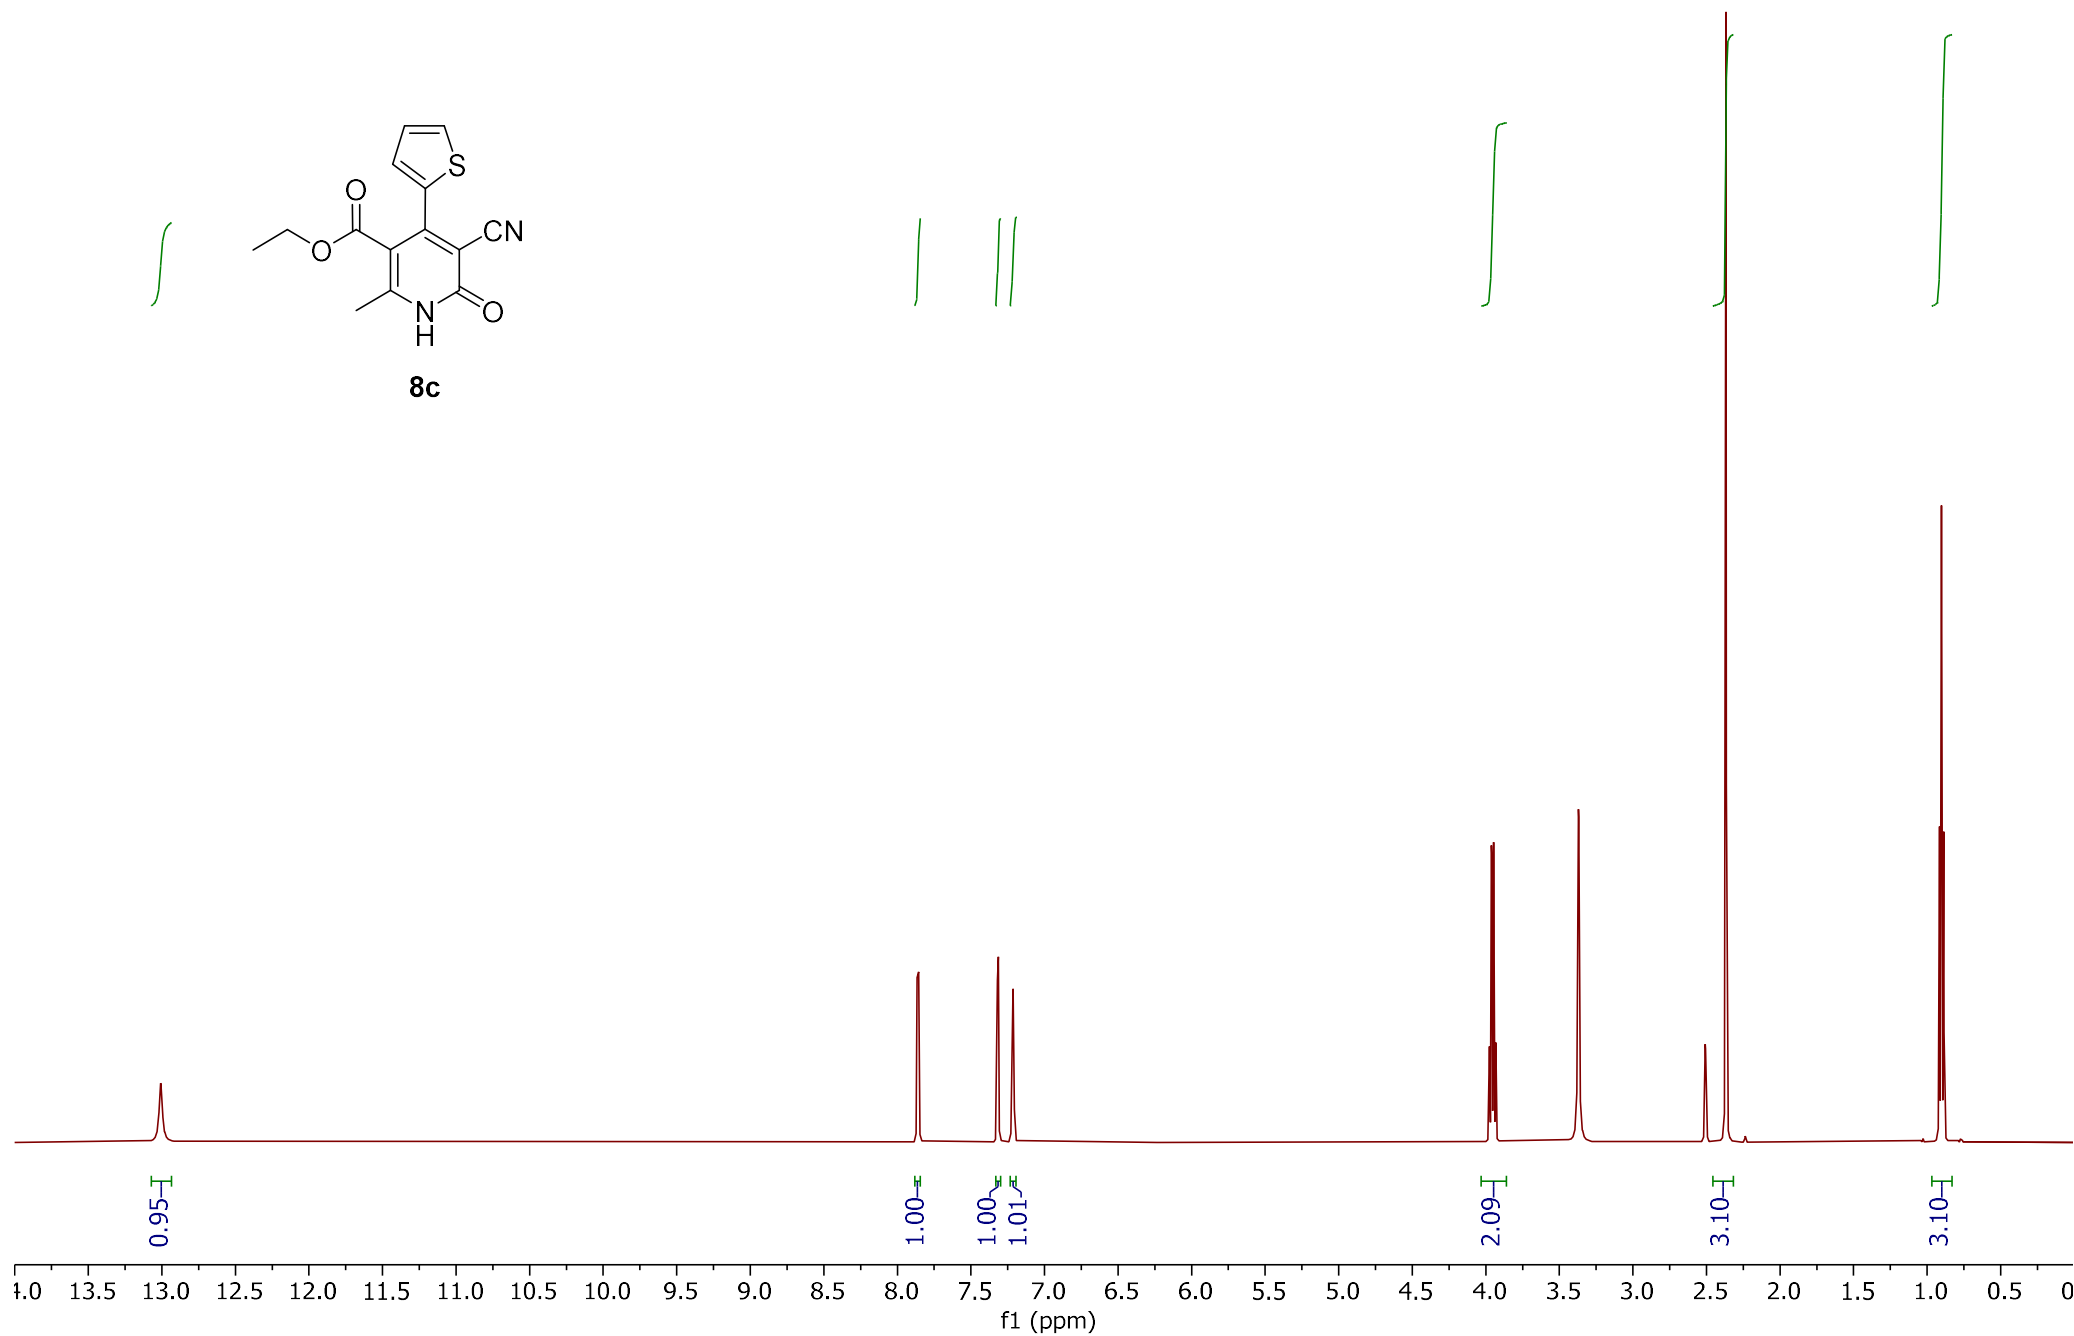 $^1\text{H}$  NMR (DMSO- $d_6$ ) **8c**

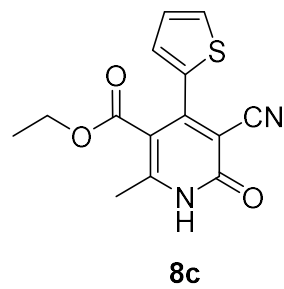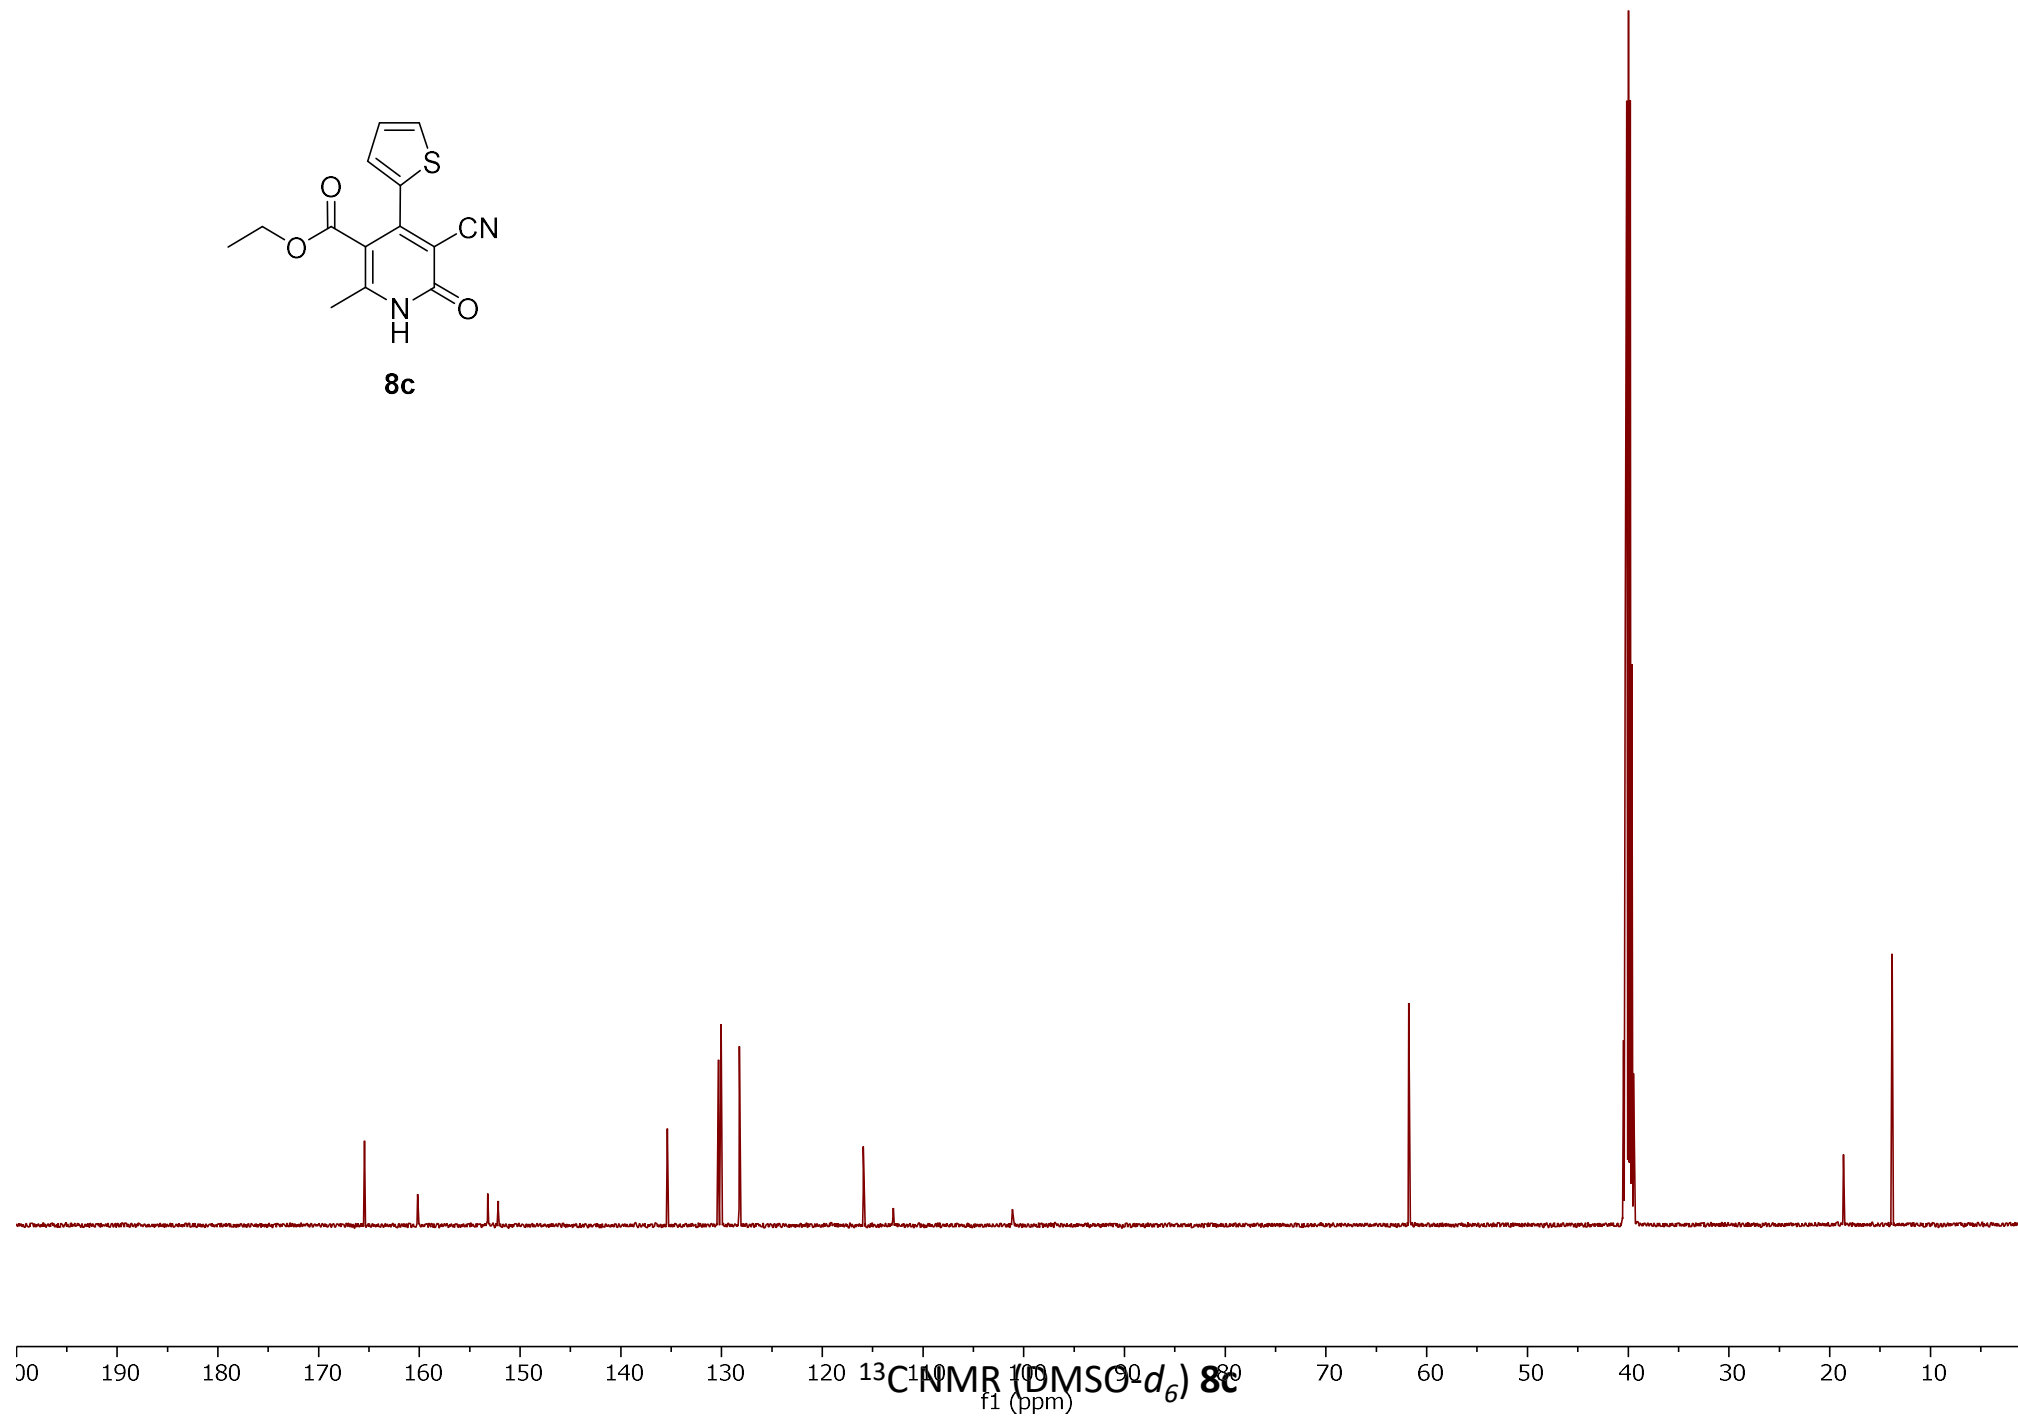

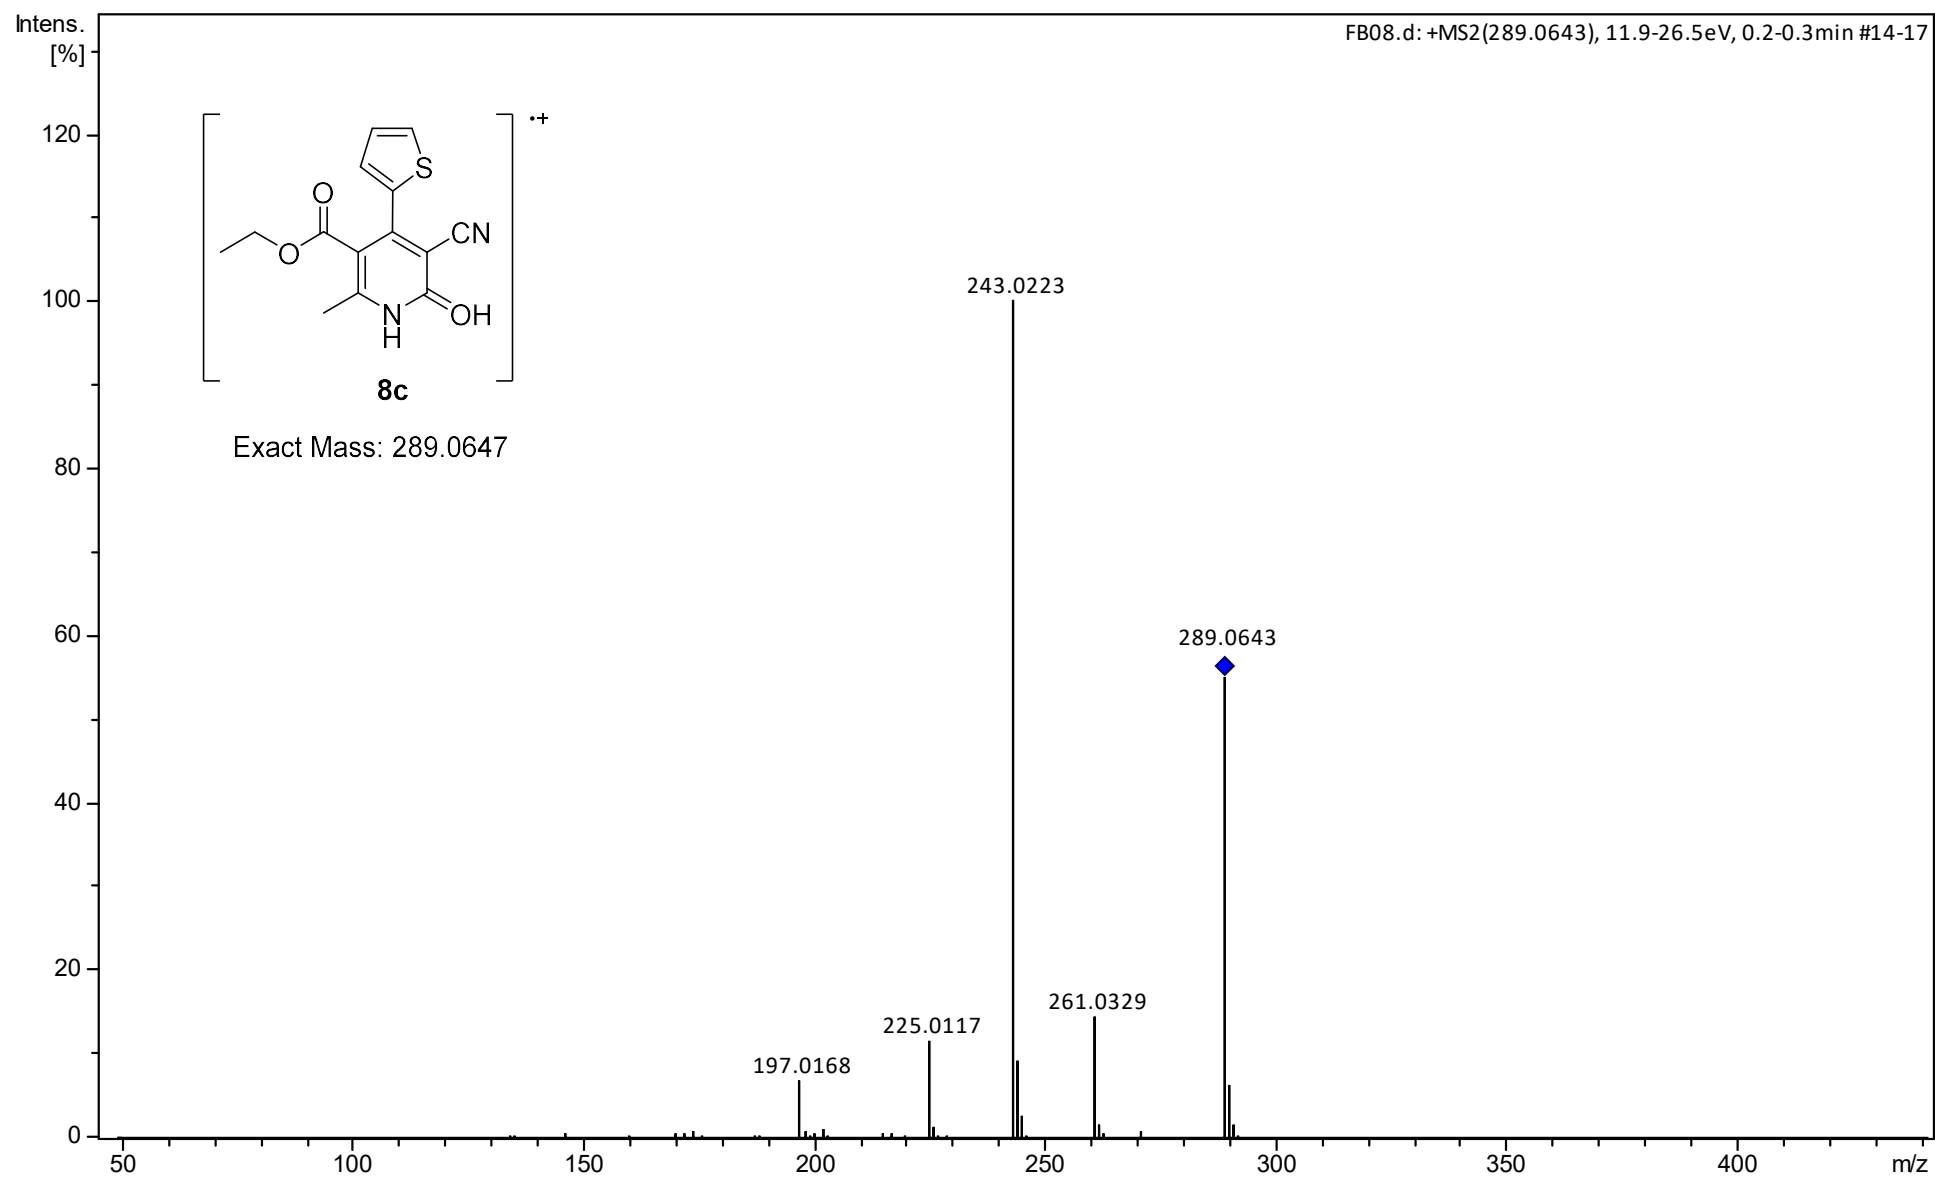HRMS **8c**

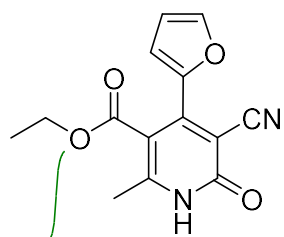**8d**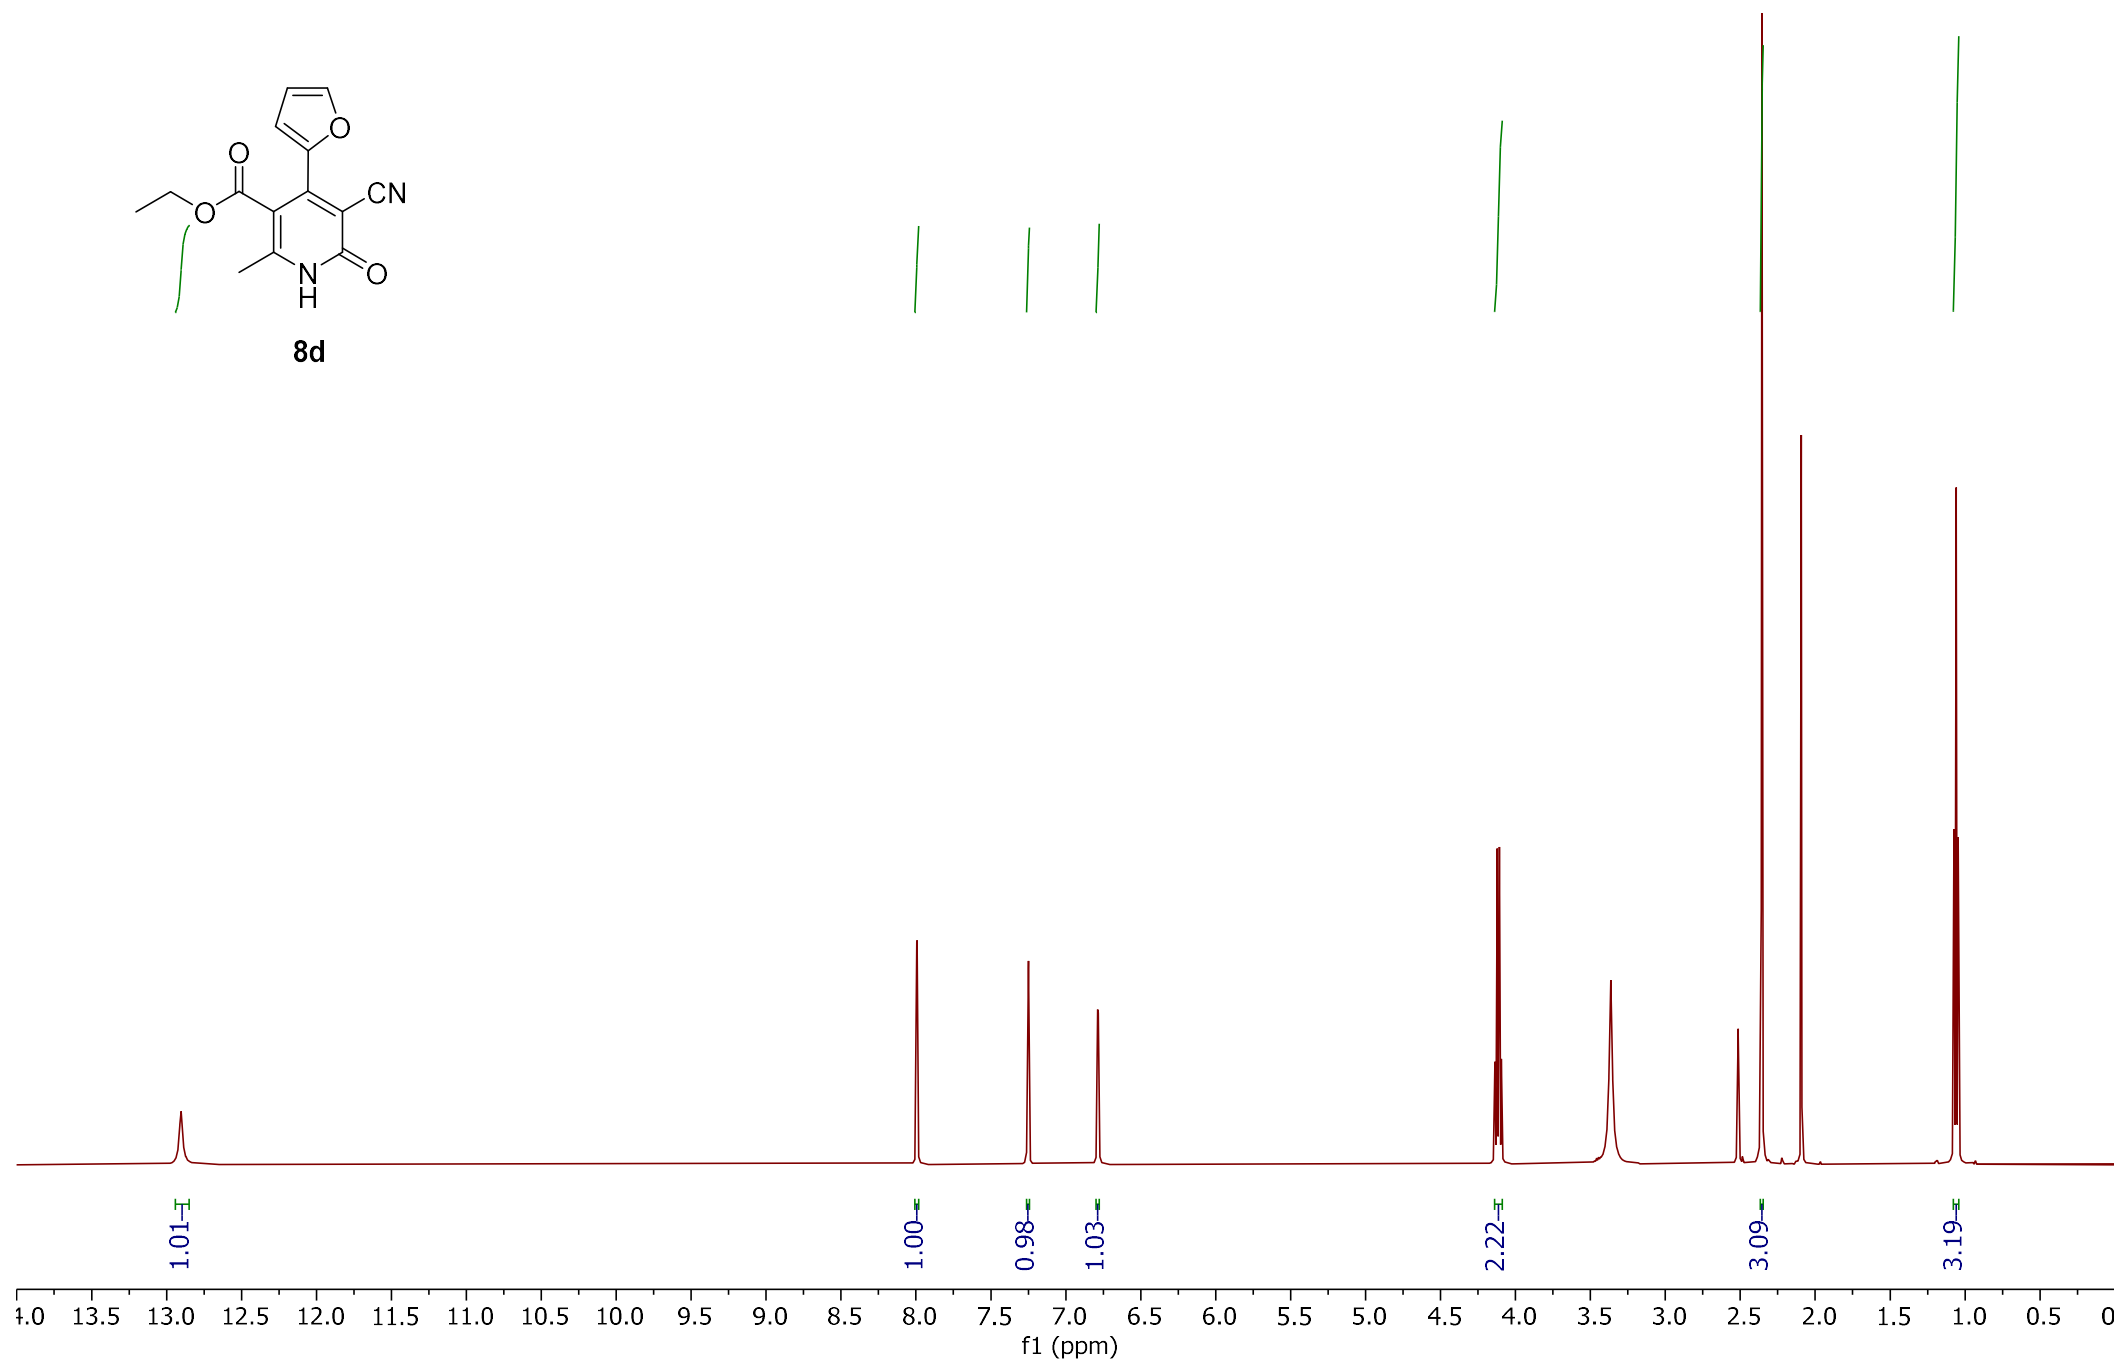 $^1\text{H}$  NMR (DMSO- $d_6$ ) **8d**



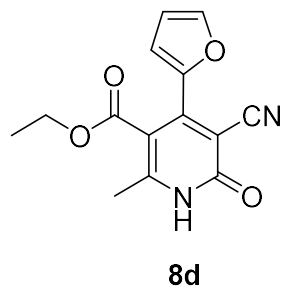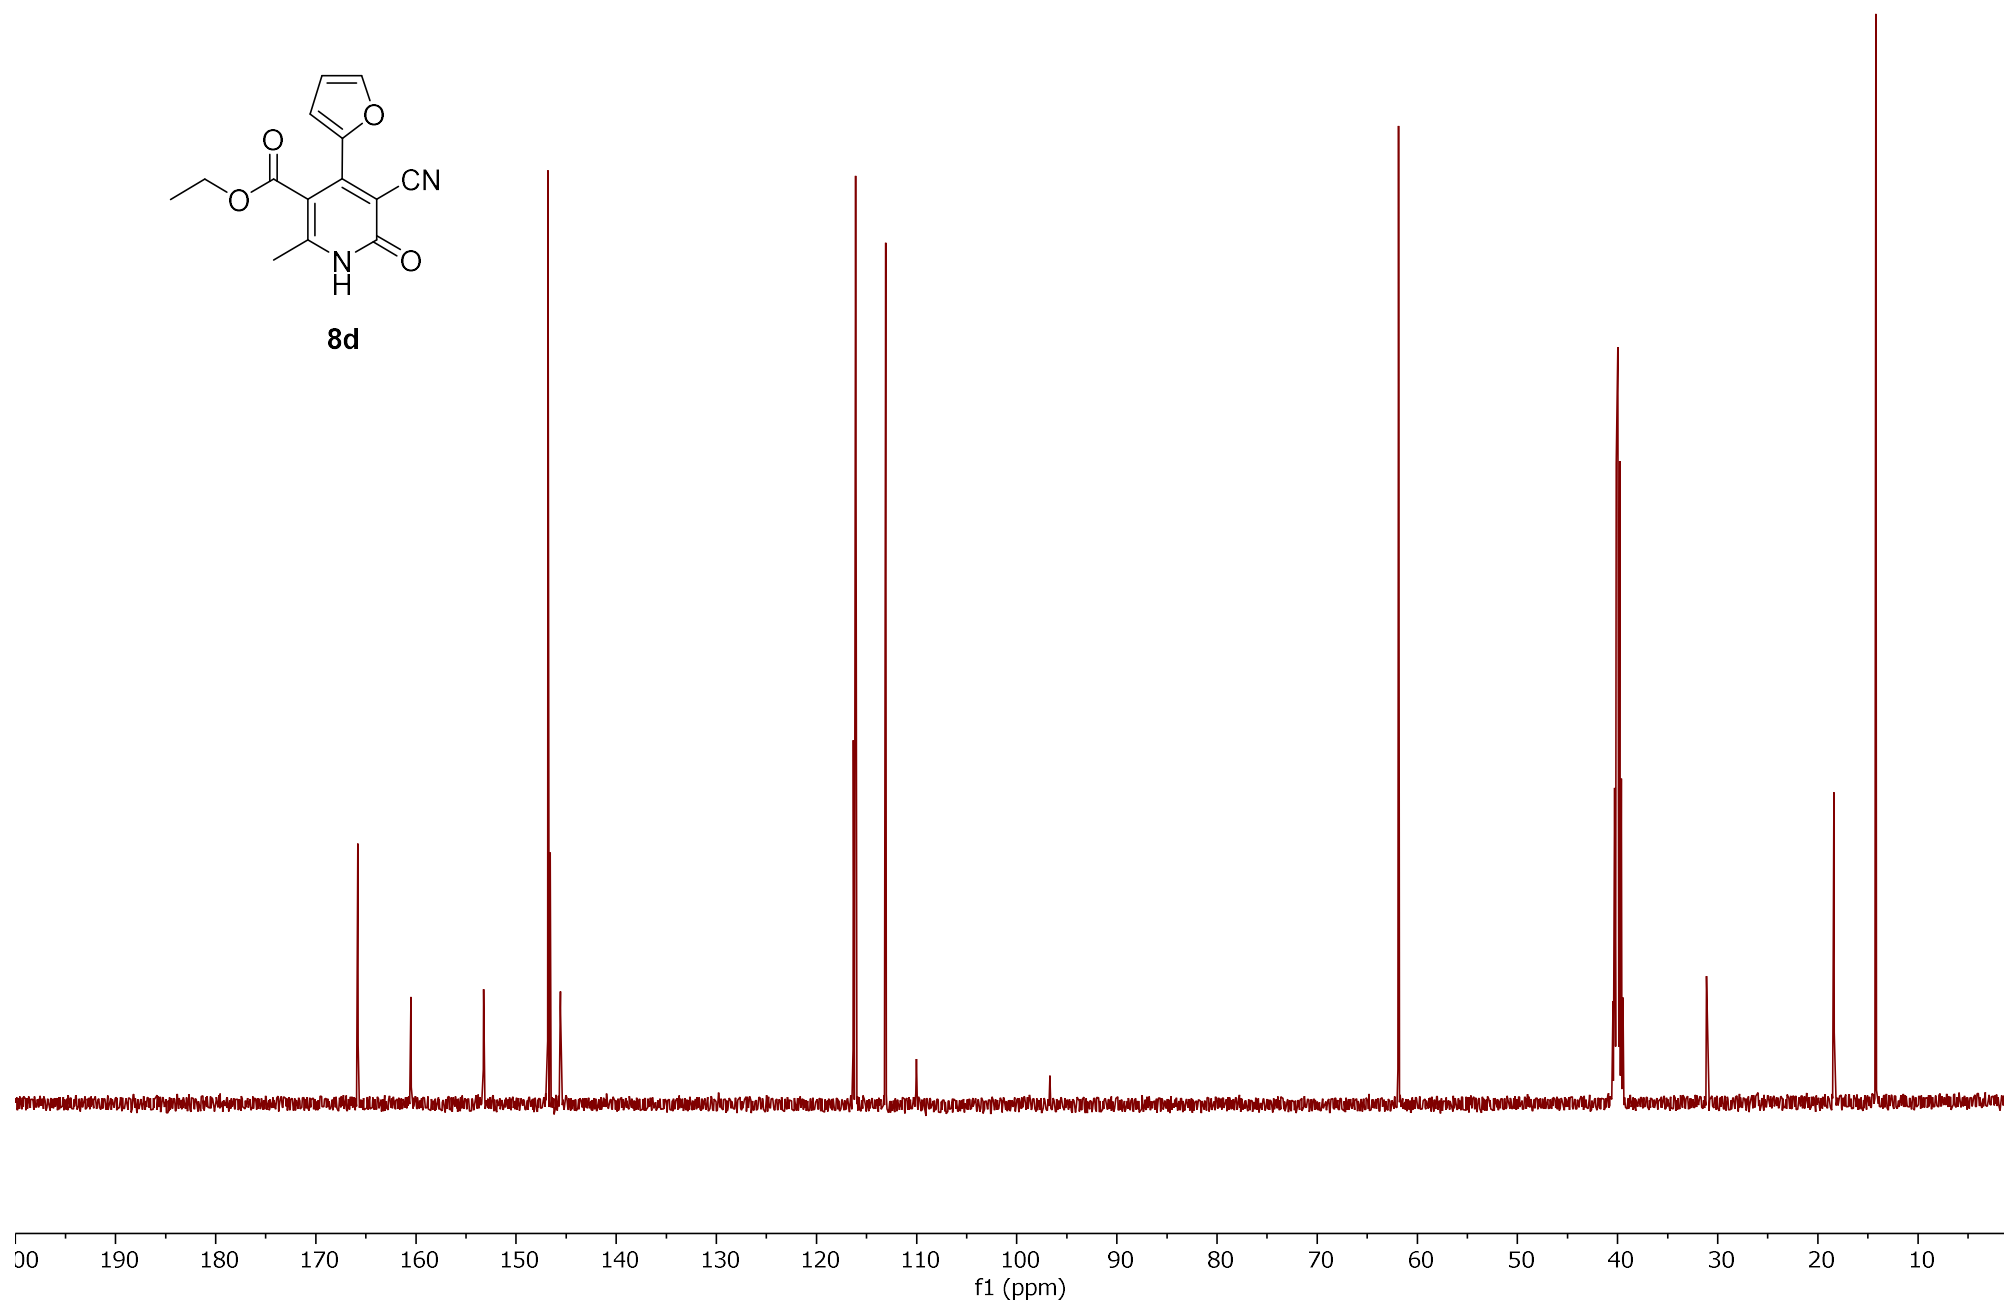

$^{13}\text{C}$  NMR (DMSO- $d_6$ ) **8d**

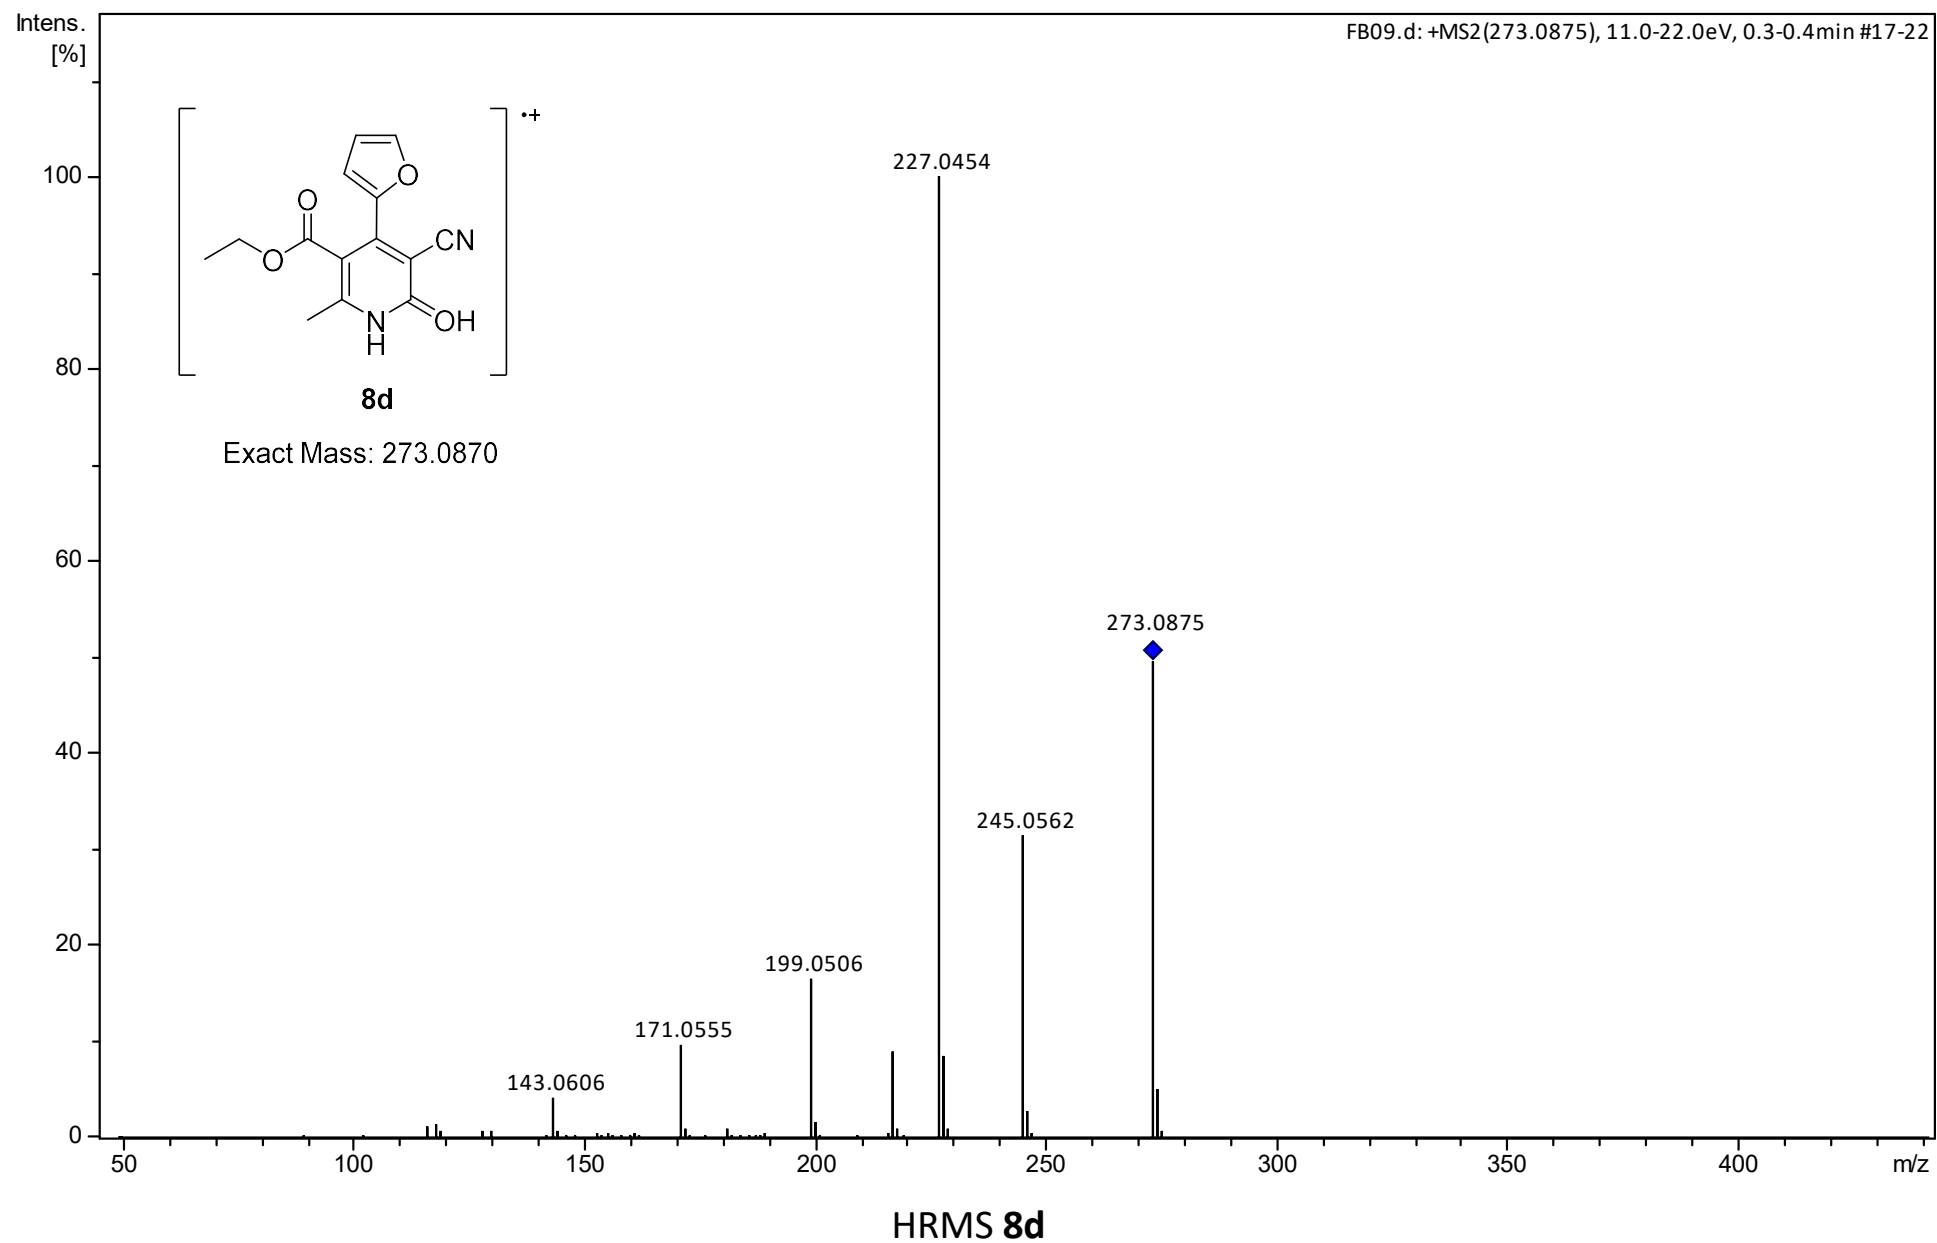

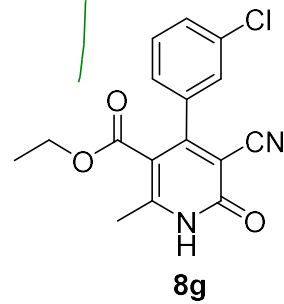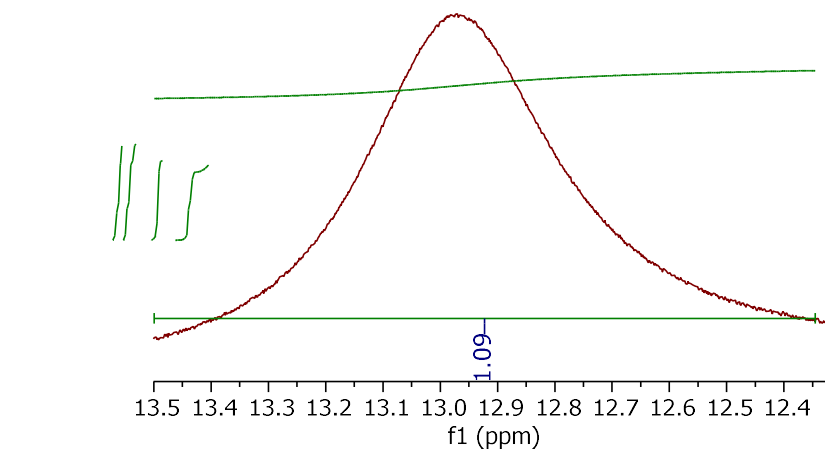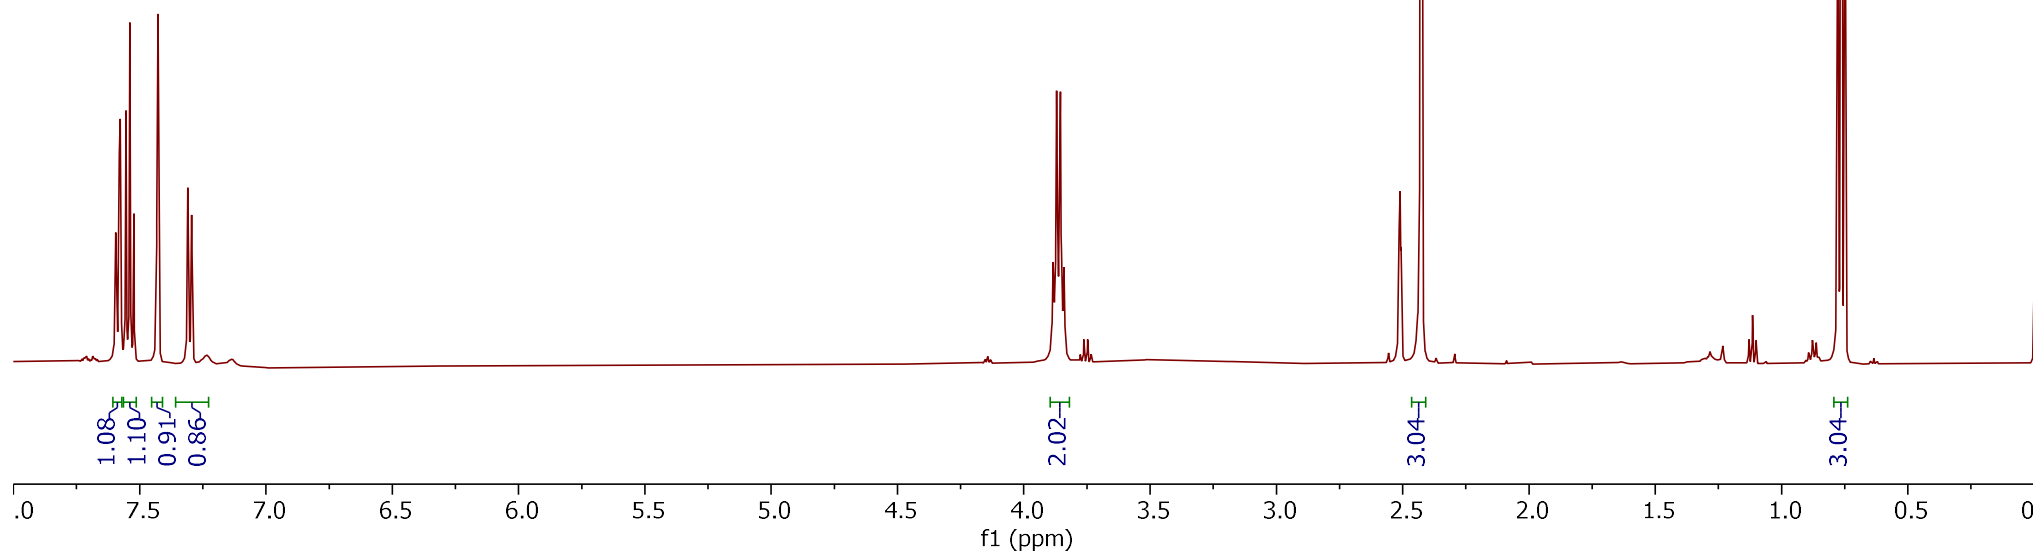 $^1\text{H}$  NMR ( $\text{DMSO}-d_6$ ) **8g**

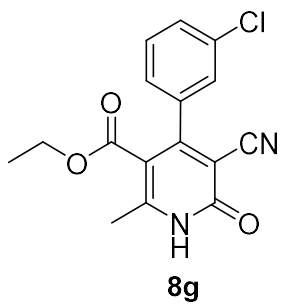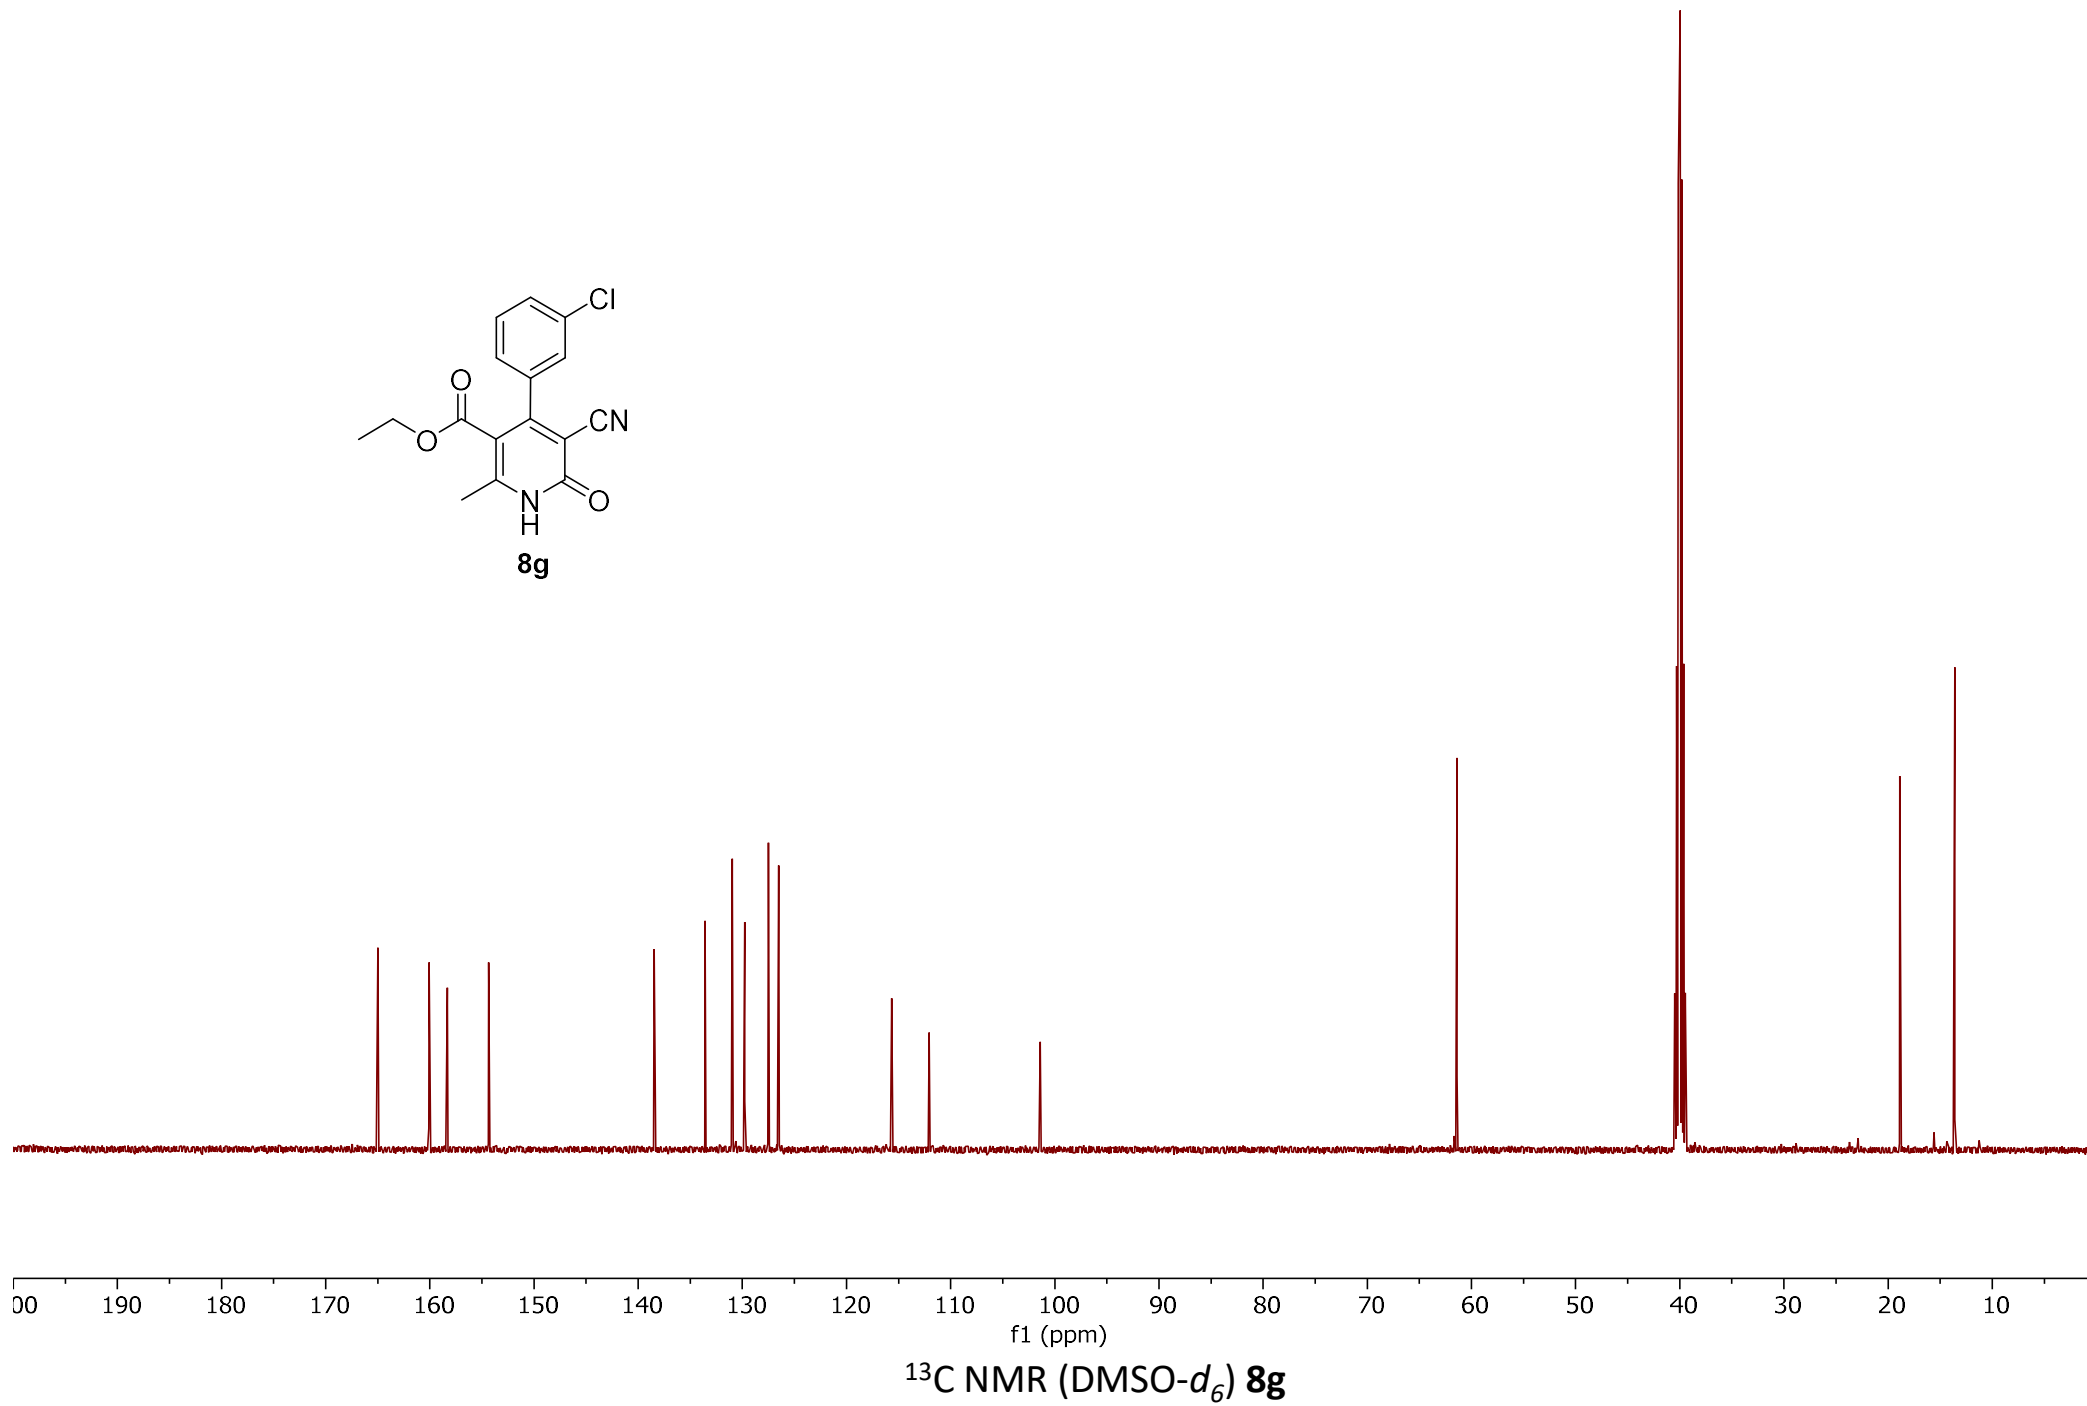

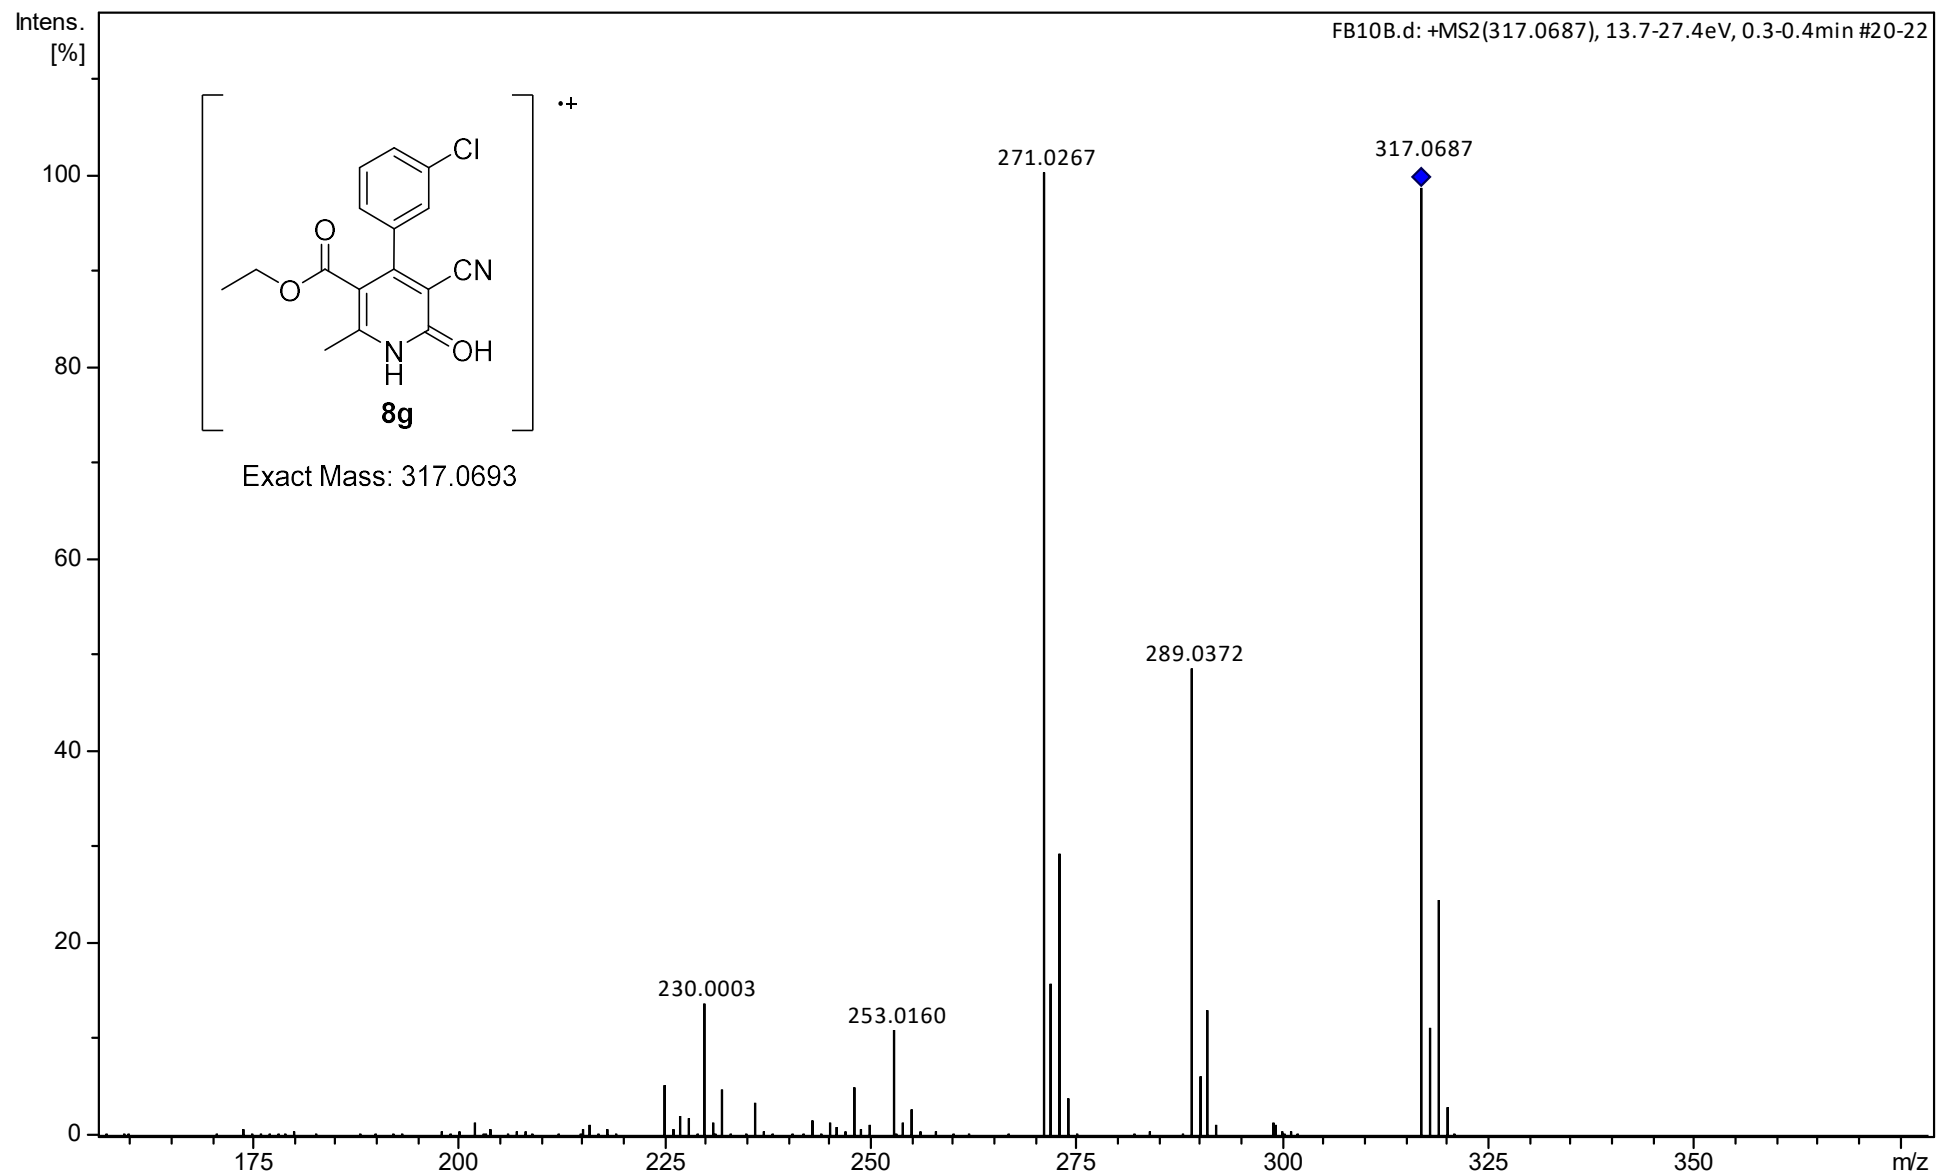HRMS **8g**

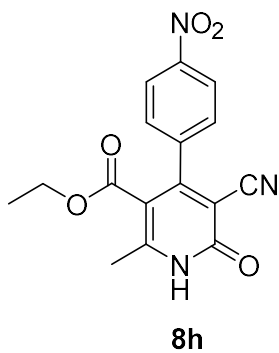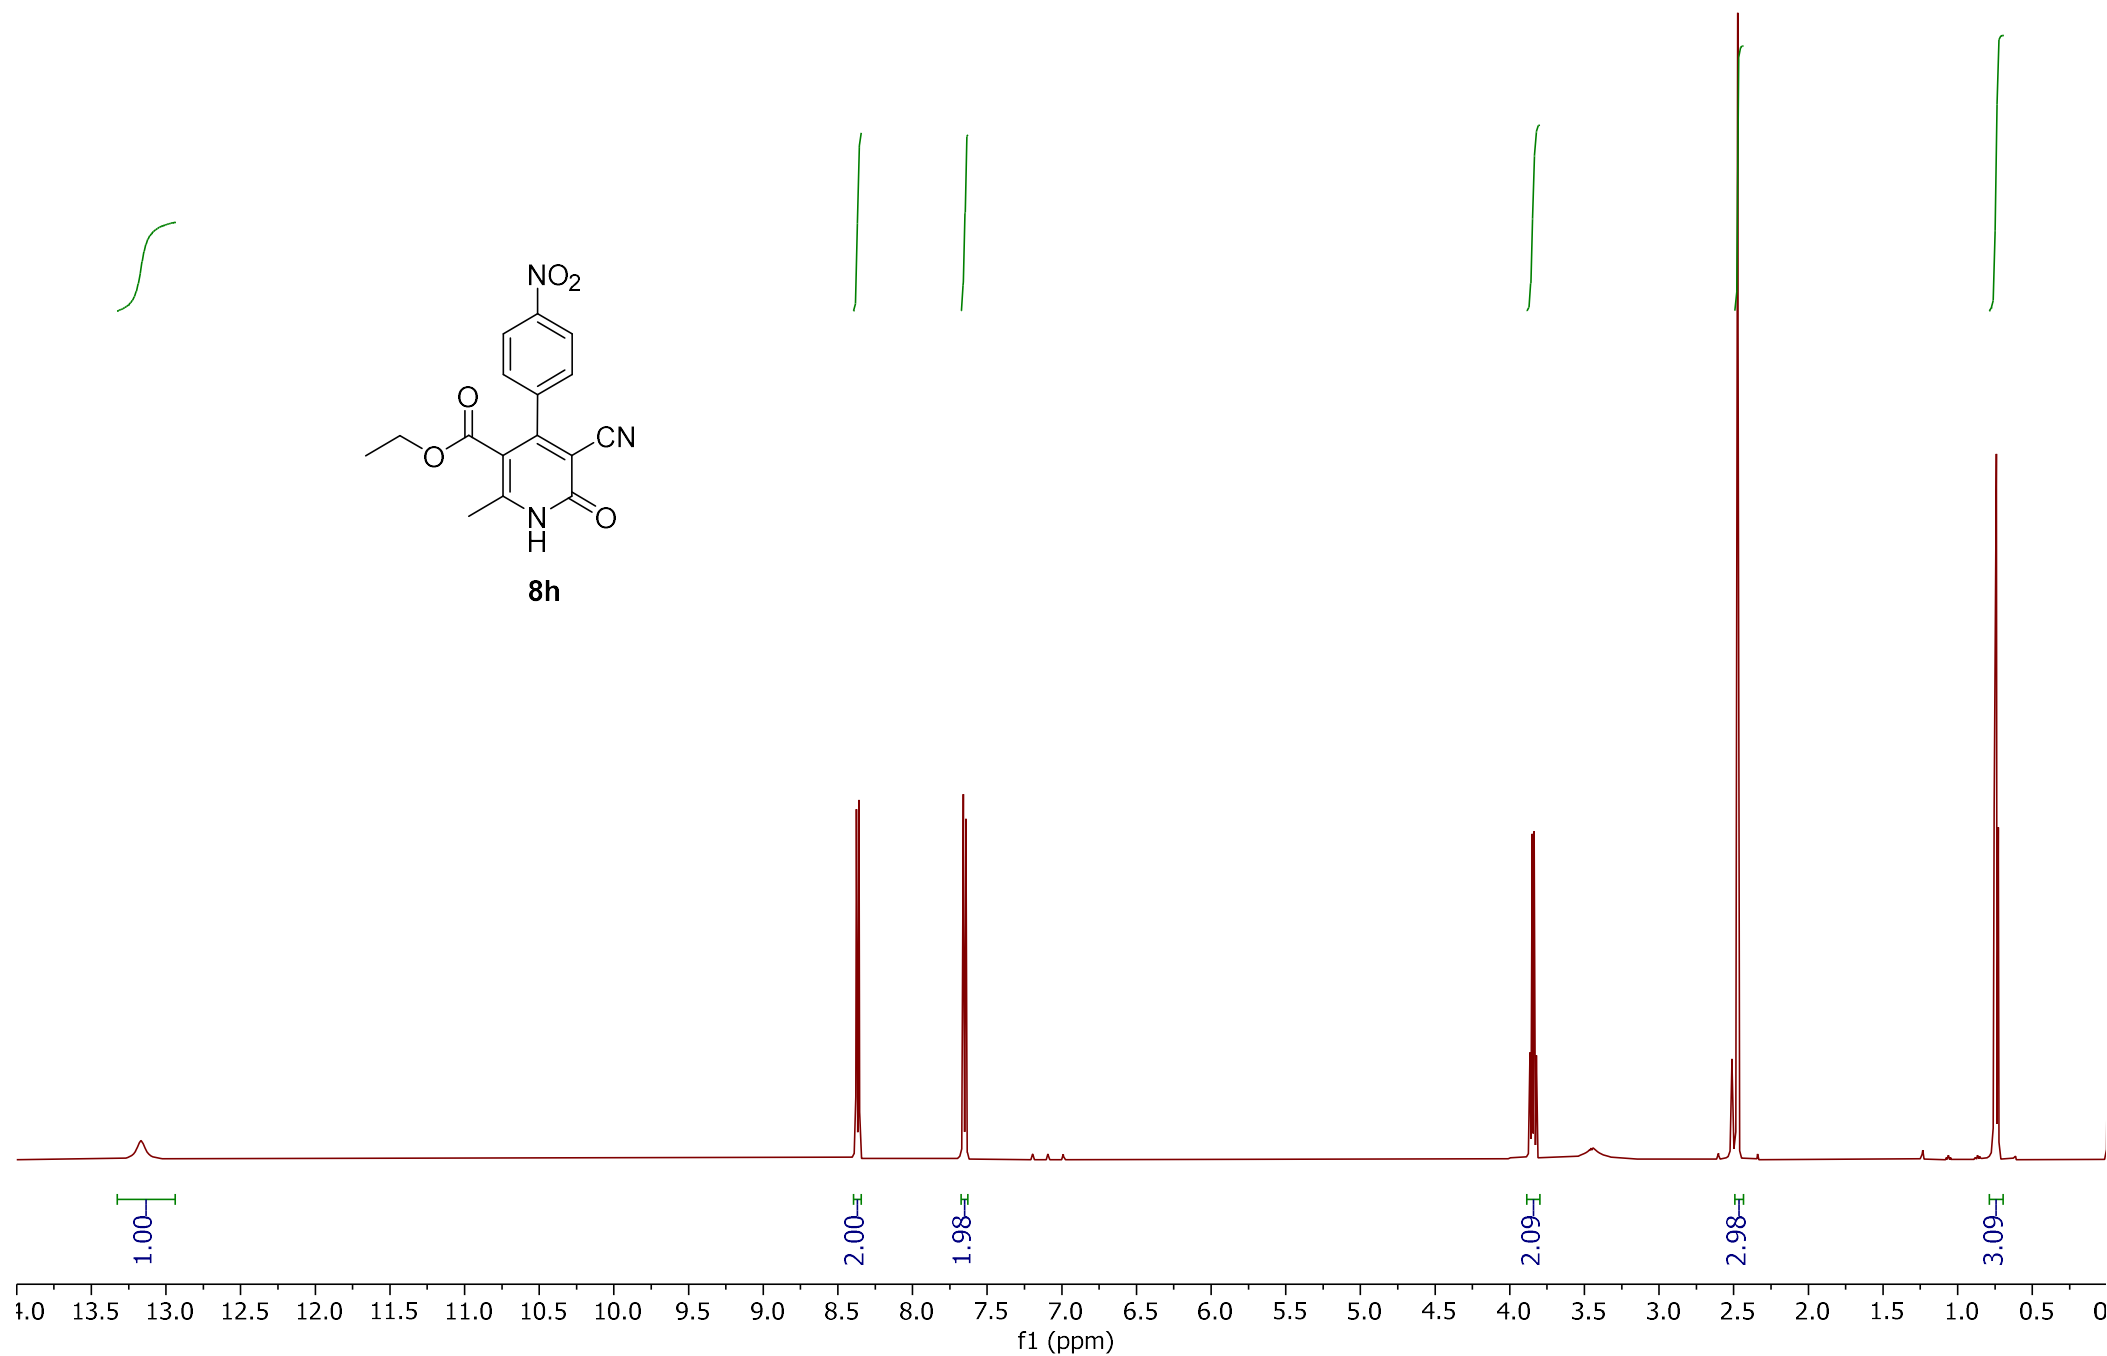 $^1\text{H}$  NMR (DMSO- $d_6$ ) **8h**

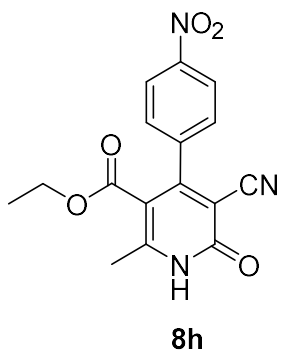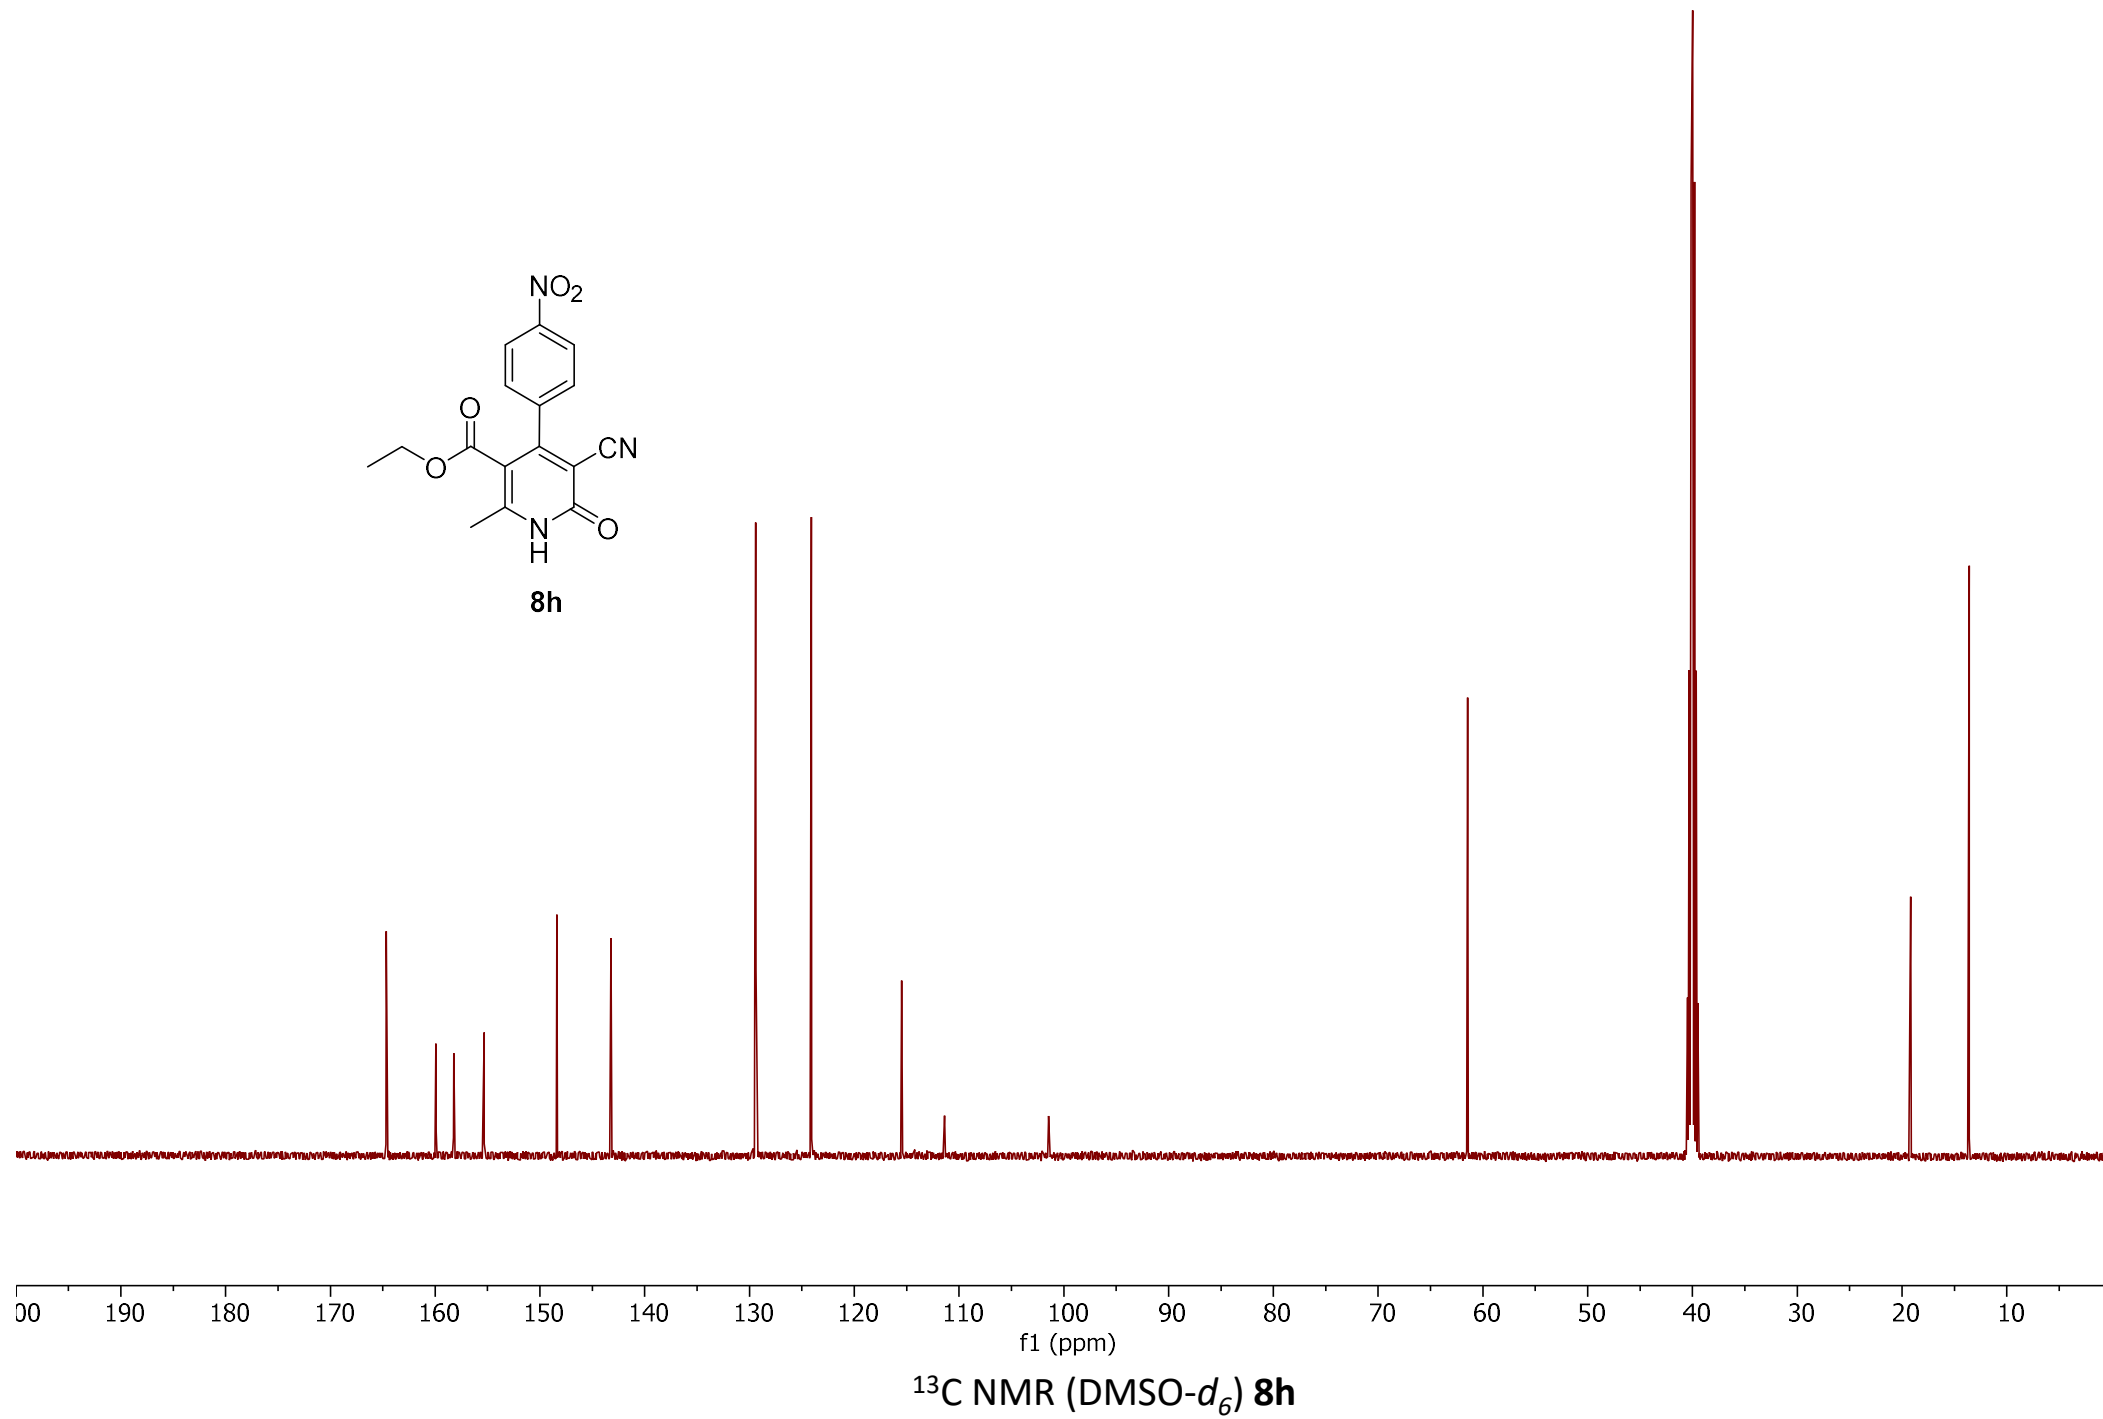

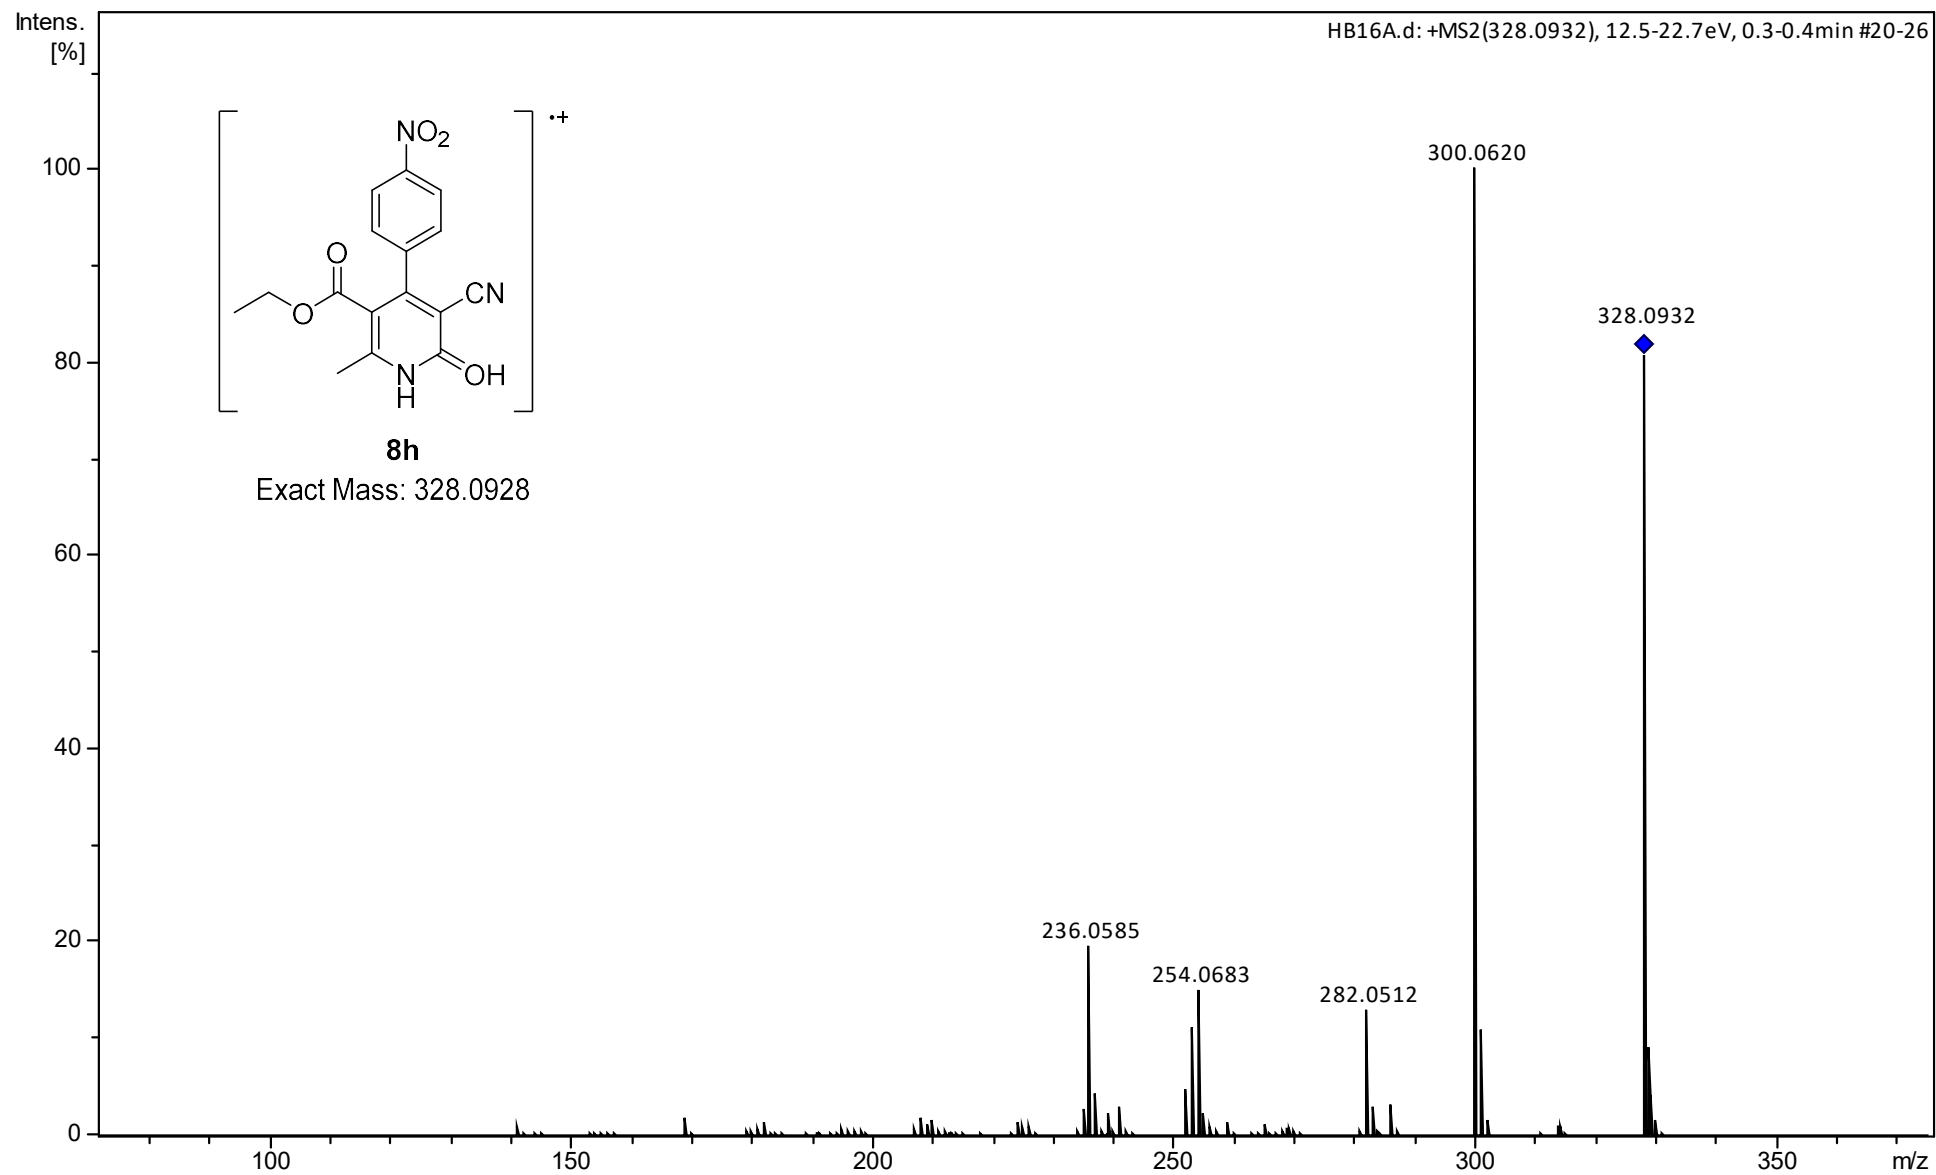HRMS **8h**
